# Supplementary material for: Molecular effects of resistance elicitors from biological origin and their potential for crop protection
Source: Front Plant Sci. 2014 Nov 21;5:655. doi: 10.3389/fpls.2014.00655 (PMC4240061; doi:10.3389/fpls.2014.00655)
Supplement: Supplementary file 3 [file DataSheet2.XLSX]

## Sheet: Sheet1
Table S2: Significant shared GO terms determined by agriGo (Du et al., 2010) using Arabidopsis thaliana genes that have been shown to be activated by the detection of elicitor compounds. Term-type P stands for biological process, F for molecular function and C for cellular component. Queryitem gives the number of genes of interest within the GO term, querytotal the total number of genes in the li…
GO_acc	term_type	Term	queryitem	querytotal	bgitem	bgtotal	pvalue	FDR	Entries
GO:0050896	P	response to stimulus	571	1564	4057	37767	3.3e-120	1.1e-116	AT5G46050 AT5G06870 AT1G51660 AT4G11660 AT5G44870 AT3G44320 AT3G47520 AT3G50950 AT5G64100 AT4G23550 AT3G14990 AT1G56160 AT1G74950 AT2G14580 AT4G10390 AT4G17070 AT1G19610 AT1G58340 AT1G72920 AT3G15020 AT1G19180 AT5G48655 AT2G26740 AT1G73500 AT1G20823 AT5G27420 AT1G45145 AT3G52400 AT2G21640 AT5G10380 AT3G14050 AT1G66370 AT3G05370 AT4G16920 AT5G26030 AT2G26380 AT2G24850 AT2G30750 AT1G72060 AT4G11360…
GO:0006950	P	response to stress	375	1564	2320	37767	1e-100	1.7e-97	AT5G46050 AT5G06870 AT1G51660 AT5G44870 AT3G44320 AT3G47520 AT3G50950 AT5G64100 AT1G56160 AT1G74950 AT4G10390 AT1G19610 AT1G72920 AT3G15020 AT1G19180 AT2G26740 AT1G73500 AT1G45145 AT3G52400 AT2G21640 AT3G14050 AT3G05370 AT4G16920 AT5G26030 AT2G26380 AT2G24850 AT1G72060 AT1G72260 AT2G29500 AT2G32660 AT4G36990 AT1G17610 AT4G08780 AT1G17190 AT2G35000 AT5G10520 AT2G20360 AT2G16500 AT4G33420 AT5G50200…
GO:0006952	P	defense response	206	1564	766	37767	1.9e-99	2e-96	AT4G31500 AT5G46050 AT5G06870 AT1G80840 AT4G26090 AT3G04210 AT2G34930 AT5G44870 AT2G43790 AT3G50950 AT1G06160 AT2G30770 AT2G32680 AT1G65390 AT3G44400 AT3G07040 AT5G61900 AT1G17600 AT5G64905 AT1G51660 AT3G12500 AT1G19610 AT5G43580 AT3G48090 AT1G72920 AT3G15020 AT2G03760 AT4G16950 AT1G19180 AT5G66900 AT4G23810 AT1G59620 AT5G06860 AT5G11250 AT1G22900 AT5G22570 AT5G36930 AT3G57260 AT3G54420 AT1G19250…
GO:0042221	P	response to chemical stimulus	327	1564	2085	37767	9.6e-86	7.7e-83	AT5G49520 AT5G46050 AT5G07010 AT1G80840 AT3G49530 AT4G11660 AT1G51700 AT2G43790 AT5G47220 AT1G18890 AT2G33380 AT1G06160 AT4G26400 AT3G46600 AT4G23550 AT4G27260 AT3G16530 AT1G56160 AT5G26920 AT2G37430 AT1G74020 AT3G53600 AT5G01550 AT1G66160 AT1G74950 AT1G69270 AT2G14580 AT2G35510 AT4G12720 AT5G01560 AT4G39230 AT4G23260 AT3G48090 AT5G09800 AT2G21640 AT5G39610 AT4G17788 AT1G19180 AT2G20420 AT5G37490…
GO:0009607	P	response to biotic stimulus	167	1564	638	37767	1.2e-79	7.5e-77	AT4G31500 AT5G46050 AT1G80840 AT4G26090 AT5G47220 AT2G34930 AT2G43790 AT2G33380 AT2G30770 AT1G56160 AT5G24530 AT2G38290 AT1G51660 AT3G12500 AT1G69370 AT3G48090 AT3G15020 AT4G16950 AT4G14400 AT4G23810 AT3G28740 AT5G22570 AT3G57260 AT4G39950 AT2G43510 AT2G04450 AT2G02810 AT3G25070 AT1G45145 AT3G52400 AT4G33430 AT4G19660 AT5G67330 AT1G74100 AT1G64060 AT2G24570 AT1G56510 AT4G12470 AT3G49120 AT5G06320…
GO:0051707	P	response to other organism	161	1564	599	37767	8.7e-79	4.7e-76	AT4G31500 AT5G46050 AT1G80840 AT4G26090 AT5G47220 AT2G34930 AT2G43790 AT2G33380 AT2G30770 AT1G56160 AT5G24530 AT2G38290 AT1G51660 AT3G12500 AT3G48090 AT3G15020 AT4G16950 AT2G39350 AT4G23810 AT3G28740 AT5G22570 AT3G57260 AT4G39950 AT2G43510 AT2G04450 AT3G25070 AT1G45145 AT4G14400 AT4G33430 AT4G19660 AT5G67330 AT1G74100 AT1G64060 AT3G52400 AT1G56510 AT4G12470 AT3G49120 AT5G06320 AT2G30750 AT5G46470…
GO:0010200	P	response to chitin	84	1564	151	37767	2.2e-73	1e-70	AT5G49520 AT1G64380 AT3G23230 AT2G13790 AT1G80840 AT2G38470 AT3G53600 AT4G11660 AT3G46620 AT1G51700 AT5G47220 AT3G21150 AT1G42990 AT3G46600 AT2G44840 AT5G67450 AT4G33940 AT4G11360 AT3G45640 AT3G21630 AT4G17230 AT3G19380 AT2G37430 AT3G28210 AT3G49530 AT5G10380 AT2G33710 AT1G66160 AT5G59550 AT1G27730 AT3G52450 AT5G51190 AT1G32640 AT1G74650 AT2G40140 AT3G15210 AT5G59450 AT4G15975 AT5G09800 AT4G17490…
GO:0051704	P	multi-organism process	173	1564	776	37767	7.5e-71	3e-68	AT4G31500 AT5G46050 AT1G80840 AT4G26090 AT5G47220 AT2G34930 AT2G43790 AT2G33380 AT2G30770 AT1G56160 AT5G24530 AT2G38290 AT1G61610 AT1G51660 AT3G12500 AT3G48090 AT3G15020 AT4G16950 AT4G14400 AT5G22650 AT4G23810 AT3G28740 AT5G22570 AT2G19130 AT3G57260 AT1G29340 AT4G39950 AT2G43510 AT2G04450 AT1G11330 AT3G25070 AT1G45145 AT3G52400 AT1G61370 AT4G27300 AT4G19660 AT5G67330 AT1G74100 AT1G64060 AT2G24570…
GO:0010033	P	response to organic substance	221	1564	1342	37767	6.8e-64	2.4e-61	AT5G49520 AT5G46050 AT5G07010 AT1G80840 AT3G49530 AT4G11660 AT1G51700 AT2G43790 AT5G47220 AT3G21150 AT2G33380 AT4G37790 AT3G46600 AT4G23550 AT4G27260 AT1G56160 AT5G26920 AT2G37430 AT1G74020 AT3G53600 AT5G01550 AT1G66160 AT1G74950 AT1G69270 AT2G14580 AT4G23260 AT3G48090 AT5G09800 AT4G17788 AT1G19180 AT2G14560 AT5G37490 AT1G72450 AT3G28580 AT4G09570 AT5G48655 AT5G01540 AT3G07390 AT2G26740 AT1G73500…
GO:0009743	P	response to carbohydrate stimulus	93	1564	240	37767	1e-62	3.4e-60	AT5G49520 AT1G64380 AT1G80840 AT3G49530 AT4G11660 AT1G51700 AT3G21150 AT3G46600 AT4G23550 AT2G37430 AT3G53600 AT1G66160 AT4G17788 AT4G23810 AT5G48655 AT4G35480 AT5G46910 AT5G27420 AT4G17230 AT2G24570 AT5G10380 AT3G50260 AT2G28830 AT5G43170 AT2G35930 AT3G46620 AT4G11360 AT3G19380 AT3G28210 AT2G33710 AT5G59550 AT5G46845 AT5G09800 AT1G20823 AT4G01350 AT4G34390 AT2G35000 AT3G44350 AT3G11840 AT2G13790…
GO:0006955	P	immune response	104	1564	367	37767	1.6e-54	4.6e-52	AT1G80840 AT4G26090 AT3G04210 AT5G44870 AT2G43790 AT1G17600 AT1G56160 AT3G44400 AT5G61900 AT1G51660 AT3G48090 AT4G16950 AT4G23810 AT5G11250 AT5G36930 AT3G57260 AT3G54420 AT1G72950 AT5G41550 AT3G25070 AT4G14400 AT1G57630 AT4G19660 AT1G74100 AT1G64060 AT3G52400 AT1G56510 AT4G12470 AT4G16920 AT1G69550 AT5G44910 AT5G06320 AT4G11650 AT1G72900 AT2G14610 AT1G75040 AT1G06160 AT5G26920 AT2G40000 AT3G05360…
GO:0002376	P	immune system process	104	1564	368	37767	2.1e-54	5.7e-52	AT1G80840 AT4G26090 AT3G04210 AT5G44870 AT2G43790 AT1G17600 AT1G56160 AT3G44400 AT5G61900 AT1G51660 AT3G48090 AT4G16950 AT4G23810 AT5G11250 AT5G36930 AT3G57260 AT3G54420 AT1G72950 AT5G41550 AT3G25070 AT4G14400 AT1G57630 AT4G19660 AT1G74100 AT1G64060 AT3G52400 AT1G56510 AT4G12470 AT4G16920 AT1G69550 AT5G44910 AT5G06320 AT4G11650 AT1G72900 AT2G14610 AT1G75040 AT1G06160 AT5G26920 AT2G40000 AT3G05360…
GO:0045087	P	innate immune response	97	1564	347	37767	1.8e-50	4.6e-48	AT4G26090 AT3G04210 AT5G44870 AT2G43790 AT1G17600 AT1G56160 AT3G44400 AT5G61900 AT1G51660 AT3G48090 AT4G16950 AT4G23810 AT5G11250 AT5G36930 AT3G57260 AT3G54420 AT1G72950 AT5G41550 AT3G25070 AT4G14400 AT1G57630 AT4G19660 AT1G74100 AT1G64060 AT3G52400 AT1G56510 AT4G12470 AT4G16920 AT1G69550 AT5G44910 AT4G11650 AT4G29810 AT2G14610 AT1G75040 AT1G06160 AT5G26920 AT2G40000 AT3G05360 AT1G17610 AT5G45110…
GO:0009617	P	response to bacterium	76	1564	247	37767	2.4e-43	5.5e-41	AT4G31500 AT5G46050 AT3G49120 AT1G80840 AT2G38470 AT4G26090 AT4G12720 AT2G30750 AT2G43790 AT5G46470 AT5G46330 AT3G54640 AT5G44070 AT2G30770 AT3G45640 AT1G56160 AT5G02490 AT5G24530 AT4G39980 AT2G23150 AT1G59870 AT3G52430 AT5G40990 AT5G57890 AT5G67330 AT5G47220 AT5G06320 AT4G11850 AT4G37980 AT5G26920 AT1G19180 AT3G28930 AT3G15020 AT2G40000 AT4G14400 AT4G23810 AT4G11650 AT3G57240 AT5G57220 AT4G23210…
GO:0009620	P	response to fungus	62	1564	158	37767	5.6e-43	1.2e-40	AT3G49120 AT1G80840 AT2G38470 AT2G34930 AT5G64120 AT4G16760 AT2G33380 AT3G25780 AT2G30770 AT3G21630 AT5G24530 AT1G17420 AT1G59870 AT5G40990 AT1G74710 AT5G42650 AT2G06050 AT2G40140 AT1G79670 AT1G05010 AT4G12480 AT2G14560 AT2G39200 AT4G16950 AT2G44490 AT1G29340 AT4G16860 AT4G01370 AT2G46440 AT5G39580 AT2G37130 AT5G57220 AT2G39660 AT3G19260 AT3G45140 AT5G45110 AT5G61600 AT3G22231 AT3G56400 AT2G35000…
GO:0009611	P	response to wounding	65	1564	197	37767	1.7e-39	3.4e-37	AT5G46050 AT1G80840 AT2G02220 AT5G10300 AT4G11280 AT5G59820 AT2G34810 AT1G73500 AT4G24350 AT3G13790 AT3G45640 AT5G54170 AT3G44260 AT2G30490 AT4G39980 AT2G37040 AT1G74020 AT1G74950 AT5G42650 AT4G10390 AT3G12500 AT2G06050 AT1G32640 AT5G43580 AT1G06160 AT4G15440 AT1G72920 AT5G53750 AT1G61120 AT5G13930 AT4G08500 AT1G76930 AT4G01370 AT4G22880 AT1G72450 AT5G20230 AT5G14780 AT1G43160 AT3G11480 AT3G45140…
GO:0016310	P	phosphorylation	151	1564	1079	37767	1.3e-36	2.5e-34	AT4G11470 AT5G61560 AT5G65600 AT1G70740 AT1G73500 AT1G28390 AT3G09830 AT1G67470 AT3G59350 AT2G17220 AT1G61610 AT5G04870 AT4G30340 AT5G25440 AT3G46930 AT4G11150 AT2G23200 AT5G58540 AT4G04500 AT5G45840 AT1G74330 AT4G09570 AT2G19130 AT5G47070 AT4G18250 AT3G55450 AT1G11330 AT3G25070 AT1G61370 AT4G23150 AT4G27300 AT4G02580 AT3G20410 AT5G63410 AT1G16670 AT1G53440 AT2G32800 AT1G66980 AT2G02220 AT4G39940…
GO:0006793	P	phosphorus metabolic process	156	1564	1179	37767	7e-35	1.2e-32	AT4G11470 AT5G61560 AT5G65600 AT1G70740 AT1G73500 AT1G28390 AT3G09830 AT1G67470 AT3G59350 AT2G17220 AT1G61610 AT5G04870 AT4G30340 AT5G25440 AT3G46930 AT4G11150 AT2G23200 AT5G58540 AT4G04500 AT5G45840 AT1G74330 AT4G09570 AT2G19130 AT5G47070 AT4G18250 AT3G55450 AT1G11330 AT3G25070 AT1G61370 AT4G33920 AT4G27300 AT4G02580 AT3G20410 AT4G23150 AT5G63410 AT1G16670 AT1G53440 AT2G32800 AT1G66980 AT2G02220…
GO:0006796	P	phosphate metabolic process	155	1564	1178	37767	2.1e-34	3.5e-32	AT4G11470 AT5G61560 AT5G65600 AT1G70740 AT1G73500 AT1G28390 AT3G09830 AT1G67470 AT3G59350 AT2G17220 AT1G61610 AT5G04870 AT4G30340 AT5G25440 AT3G46930 AT4G11150 AT2G23200 AT5G58540 AT4G04500 AT5G45840 AT1G74330 AT4G09570 AT2G19130 AT5G47070 AT4G18250 AT3G55450 AT1G11330 AT3G25070 AT1G61370 AT4G33920 AT4G27300 AT4G02580 AT3G20410 AT4G23150 AT5G63410 AT1G16670 AT1G53440 AT2G32800 AT1G66980 AT2G02220…
GO:0042742	P	defense response to bacterium	57	1564	177	37767	3e-34	4.9e-32	AT4G31500 AT5G46050 AT3G49120 AT1G80840 AT2G38470 AT4G26090 AT4G12720 AT2G43790 AT5G46470 AT5G46330 AT3G54640 AT5G44070 AT2G30770 AT1G56160 AT2G23150 AT1G59870 AT3G52430 AT5G40990 AT1G74710 AT5G67330 AT5G47220 AT5G06320 AT4G11850 AT5G26920 AT1G19180 AT3G15020 AT2G40000 AT4G14400 AT4G23810 AT4G11650 AT5G57220 AT5G22570 AT5G45110 AT1G53240 AT1G19250 AT3G56400 AT4G39950 AT1G70690 AT1G02450 AT2G19190…
GO:0006468	P	protein amino acid phosphorylation	135	1564	946	37767	6.1e-34	9.3e-32	AT4G11470 AT5G61560 AT5G65600 AT1G70740 AT1G73500 AT1G28390 AT3G09830 AT1G67470 AT3G59350 AT2G17220 AT1G61610 AT5G04870 AT5G25440 AT3G46930 AT2G23200 AT5G58540 AT4G04500 AT5G45840 AT1G74330 AT4G09570 AT2G19130 AT5G47070 AT4G18250 AT3G55450 AT1G11330 AT3G25070 AT1G61370 AT4G23150 AT4G27300 AT3G20410 AT5G63410 AT1G66880 AT1G53440 AT2G32800 AT1G66980 AT2G02220 AT5G39030 AT1G51850 AT3G09010 AT1G61360…
GO:0009605	P	response to external stimulus	86	1564	429	37767	3.6e-33	5.2e-31	AT5G46050 AT1G80840 AT1G74020 AT4G26090 AT5G45380 AT3G44320 AT1G73500 AT5G10300 AT4G10390 AT5G43580 AT4G15440 AT3G49620 AT1G72920 AT5G53750 AT1G72450 AT1G71040 AT5G27420 AT1G76650 AT3G13790 AT1G74100 AT1G72520 AT4G11280 AT2G02220 AT2G24850 AT4G24350 AT1G55920 AT2G34810 AT2G14610 AT1G06160 AT2G06850 AT5G20230 AT1G74950 AT5G13320 AT2G38870 AT5G50200 AT1G55020 AT5G20480 AT4G34710 AT3G51660 AT5G05730…
GO:0050832	P	defense response to fungus	44	1564	108	37767	6.7e-32	9.4e-30	AT3G49120 AT1G80840 AT2G38470 AT2G34930 AT5G64120 AT1G29340 AT2G30770 AT2G39660 AT3G21630 AT1G59870 AT5G40990 AT1G74710 AT2G40140 AT4G12480 AT2G14560 AT2G39200 AT4G16950 AT2G44490 AT4G16860 AT5G39580 AT5G61600 AT5G57220 AT5G45110 AT3G56400 AT2G35000 AT2G37130 AT1G19250 AT2G43510 AT4G31800 AT1G45145 AT3G52400 AT1G11310 AT4G33430 AT1G61560 AT4G19660 AT4G12490 AT3G11820 AT1G64060 AT2G38870 AT1G64280…
GO:0043687	P	post-translational protein modification	150	1564	1248	37767	3.4e-29	4.6e-27	AT4G11470 AT5G61560 AT5G65600 AT1G70740 AT1G73500 AT1G28390 AT3G09830 AT1G67470 AT3G59350 AT2G17220 AT5G67340 AT5G04870 AT4G24940 AT1G76390 AT5G25440 AT3G46930 AT5G06750 AT2G23200 AT5G58540 AT4G04500 AT5G45840 AT1G74330 AT4G09570 AT2G19130 AT5G47070 AT4G18250 AT3G55450 AT1G11330 AT3G25070 AT1G61370 AT4G33920 AT4G27300 AT3G20410 AT4G23150 AT5G63410 AT1G16670 AT1G53440 AT2G32800 AT1G66980 AT2G02220…
GO:0009814	P	defense response, incompatible interaction	46	1564	143	37767	5.6e-28	7.1e-26	AT3G21630 AT1G51660 AT2G39200 AT4G11850 AT1G29340 AT4G20380 AT4G29810 AT1G59870 AT3G52430 AT1G74710 AT1G75040 AT3G12500 AT1G06160 AT5G26920 AT3G48090 AT4G16950 AT2G40000 AT4G14400 AT4G01370 AT4G23810 AT4G11650 AT3G57260 AT5G45110 AT2G14610 AT3G56400 AT1G02450 AT5G10520 AT5G13320 AT1G19250 AT4G12470 AT3G25070 AT4G26070 AT4G16860 AT1G11310 AT1G61560 AT4G19660 AT1G55020 AT4G16890 AT1G74100 AT2G44490…
GO:0009719	P	response to endogenous stimulus	130	1564	1068	37767	3.5e-26	4.3e-24	AT5G46050 AT5G07010 AT1G74020 AT5G47220 AT2G43790 AT2G33380 AT4G37790 AT4G27260 AT1G56160 AT5G01550 AT1G74950 AT1G69270 AT2G14580 AT4G23260 AT4G17788 AT1G19180 AT1G72450 AT3G28580 AT4G09570 AT2G26740 AT1G73500 AT2G23170 AT5G01540 AT3G07390 AT5G27420 AT1G63840 AT3G52400 AT5G54490 AT2G05710 AT5G66400 AT1G74100 AT5G60360 AT1G64060 AT1G18570 AT1G28480 AT5G55120 AT5G59310 AT3G50970 AT1G01560 AT2G24850…
GO:0019748	P	secondary metabolic process	81	1564	489	37767	1.4e-25	1.7e-23	AT4G31500 AT3G51430 AT1G10370 AT2G38470 AT1G32640 AT4G15340 AT2G43790 AT3G44320 AT1G73500 AT5G44070 AT2G30770 AT5G14700 AT1G02400 AT3G45640 AT1G64160 AT5G24530 AT1G27130 AT5G45340 AT2G37040 AT1G59870 AT3G21230 AT1G33030 AT2G39175 AT4G36220 AT3G21070 AT2G29470 AT3G02130 AT1G66370 AT1G56650 AT5G46845 AT4G34230 AT3G14440 AT3G51440 AT2G30490 AT1G67980 AT1G72680 AT1G17170 AT5G13930 AT1G62570 AT5G40760…
GO:0006725	P	cellular aromatic compound metabolic process	71	1564	399	37767	1.5e-24	1.7e-22	AT4G31500 AT2G04400 AT2G38470 AT1G32640 AT2G43790 AT4G39950 AT3G54640 AT1G73500 AT5G44070 AT2G30770 AT5G14700 AT3G45640 AT1G64160 AT5G24530 AT5G26920 AT4G39980 AT2G37040 AT1G59870 AT3G21230 AT5G57890 AT2G39175 AT4G36220 AT2G41010 AT3G02130 AT1G33030 AT1G56650 AT5G46845 AT4G34230 AT5G13930 AT2G30490 AT1G67980 AT1G72680 AT1G22410 AT2G43820 AT5G17990 AT5G38530 AT3G50740 AT4G22880 AT4G17788 AT5G22630…
GO:0006464	P	protein modification process	156	1564	1474	37767	1.7e-24	1.9e-22	AT4G11470 AT5G61560 AT3G06300 AT1G70740 AT1G73500 AT1G28390 AT3G09830 AT1G67470 AT3G59350 AT2G17220 AT5G67340 AT5G57500 AT5G04870 AT4G24940 AT1G76390 AT5G25440 AT3G46930 AT5G06750 AT2G23200 AT5G58540 AT5G65600 AT4G04500 AT5G45840 AT1G74330 AT4G09570 AT2G19130 AT5G47070 AT4G18250 AT3G55450 AT1G11330 AT3G25070 AT1G61370 AT4G33920 AT4G27300 AT3G20410 AT4G23150 AT5G63410 AT1G16670 AT1G53440 AT2G32800…
GO:0019438	P	aromatic compound biosynthetic process	54	1564	237	37767	2.2e-24	2.4e-22	AT4G31500 AT2G04400 AT2G38470 AT1G32640 AT2G43790 AT4G39950 AT3G54640 AT1G73500 AT1G33030 AT2G30770 AT5G14700 AT3G45640 AT1G64160 AT5G24530 AT5G26920 AT4G39980 AT2G37040 AT3G21230 AT5G57890 AT2G39175 AT4G36220 AT1G56650 AT5G46845 AT4G34230 AT5G13930 AT2G30490 AT1G67980 AT1G72680 AT4G39030 AT5G17990 AT5G38530 AT4G22880 AT4G17788 AT5G22630 AT3G55120 AT2G36790 AT1G74710 AT1G69370 AT3G44720 AT3G14990…
GO:0009753	P	response to jasmonic acid stimulus	50	1564	215	37767	3.9e-23	4e-21	AT5G55120 AT5G07010 AT3G09600 AT1G74020 AT2G24850 AT5G46050 AT2G43790 AT5G47220 AT2G31180 AT1G70700 AT2G34810 AT1G66370 AT1G72260 AT5G24780 AT2G14580 AT1G32640 AT1G06160 AT1G56650 AT3G23240 AT5G13930 AT1G61120 AT1G17380 AT1G19180 AT1G15520 AT4G01370 AT4G22880 AT1G72450 AT1G06180 AT3G45140 AT2G16720 AT5G13220 AT3G56400 AT3G09940 AT3G15210 AT1G74950 AT2G34600 AT4G11280 AT3G52400 AT5G44420 AT5G42650…
GO:0031347	P	regulation of defense response	29	1564	66	37767	9.9e-23	9.9e-21	AT5G47220 AT1G80840 AT4G12720 AT2G43790 AT1G56160 AT1G59870 AT3G52430 AT5G40990 AT1G74710 AT5G61900 AT3G11820 AT3G05360 AT4G23810 AT3G61190 AT3G56400 AT1G02450 AT3G15210 AT1G19250 AT2G18950 AT4G31800 AT3G25070 AT3G52400 AT2G25000 AT5G20480 AT4G39030 AT2G40750 AT1G64280 AT1G11310 AT3G01080
GO:0008219	P	cell death	56	1564	286	37767	8e-22	7.5e-20	AT4G11280 AT5G58120 AT1G69550 AT4G26090 AT3G04210 AT5G44870 AT3G50950 AT4G19510 AT1G29340 AT1G66090 AT4G33430 AT4G20380 AT1G61560 AT3G07040 AT3G44400 AT2G26560 AT5G61900 AT1G17600 AT2G17480 AT1G16420 AT4G12720 AT5G41740 AT4G37980 AT3G48090 AT1G56540 AT2G39200 AT5G40910 AT4G14400 AT5G66900 AT1G17610 AT3G04220 AT5G11250 AT4G23210 AT5G36930 AT5G46520 AT1G29690 AT5G47910 AT5G22690 AT5G41550 AT1G19250…
GO:0016265	P	death	56	1564	286	37767	8e-22	7.5e-20	AT4G11280 AT5G58120 AT1G69550 AT4G26090 AT3G04210 AT5G44870 AT3G50950 AT4G19510 AT1G29340 AT1G66090 AT4G33430 AT4G20380 AT1G61560 AT3G07040 AT3G44400 AT2G26560 AT5G61900 AT1G17600 AT2G17480 AT1G16420 AT4G12720 AT5G41740 AT4G37980 AT3G48090 AT1G56540 AT2G39200 AT5G40910 AT4G14400 AT5G66900 AT1G17610 AT3G04220 AT5G11250 AT4G23210 AT5G36930 AT5G46520 AT1G29690 AT5G47910 AT5G22690 AT5G41550 AT1G19250…
GO:0043412	P	macromolecule modification	159	1564	1636	37767	2.8e-21	2.5e-19	AT4G11470 AT5G61560 AT3G06300 AT1G70740 AT1G73500 AT1G28390 AT3G09830 AT1G67470 AT3G59350 AT2G17220 AT5G67340 AT5G57500 AT5G04870 AT4G24940 AT1G76390 AT5G25440 AT3G46930 AT5G06750 AT2G23200 AT5G58540 AT5G65600 AT4G04500 AT5G45840 AT1G74330 AT4G09570 AT2G19130 AT5G47070 AT4G18250 AT3G55450 AT1G11330 AT3G25070 AT1G61370 AT4G33920 AT4G27300 AT3G20410 AT4G23150 AT5G63410 AT1G16670 AT1G53440 AT2G32800…
GO:0006979	P	response to oxidative stress	59	1564	332	37767	1e-20	9.1e-19	AT5G05340 AT5G26030 AT3G17790 AT5G08670 AT4G12720 AT5G59820 AT1G16420 AT2G43790 AT1G72060 AT1G32640 AT5G19890 AT1G49570 AT4G20380 AT2G47510 AT3G45640 AT2G37040 AT5G20230 AT2G29500 AT1G27730 AT4G39640 AT2G35510 AT5G44380 AT1G56650 AT3G48090 AT5G13930 AT5G39610 AT1G61120 AT4G20830 AT4G02380 AT1G14540 AT2G40000 AT1G09940 AT1G02930 AT1G21520 AT1G13340 AT4G08780 AT3G30775 AT4G33420 AT1G78410 AT5G55070…
GO:0080134	P	regulation of response to stress	30	1564	83	37767	1.7e-20	1.4e-18	AT5G47220 AT1G80840 AT4G12720 AT2G43790 AT3G45640 AT1G56160 AT1G59870 AT3G52430 AT5G40990 AT1G74710 AT5G61900 AT3G11820 AT3G05360 AT4G23810 AT3G61190 AT3G01080 AT1G02450 AT3G15210 AT1G19250 AT2G18950 AT4G31800 AT3G25070 AT3G52400 AT2G25000 AT5G20480 AT4G39030 AT2G40750 AT1G64280 AT1G11310 AT3G56400
GO:0006575	P	cellular amino acid derivative metabolic process	57	1564	315	37767	1.8e-20	1.5e-18	AT4G31500 AT4G11280 AT1G01480 AT1G32640 AT5G17990 AT3G06300 AT3G54640 AT1G73500 AT1G80820 AT4G20380 AT5G14700 AT1G64160 AT5G24530 AT5G46845 AT2G37040 AT3G21230 AT5G57890 AT2G39175 AT1G62380 AT4G36220 AT3G02130 AT1G56650 AT2G04400 AT4G34230 AT5G13930 AT2G30490 AT1G67980 AT1G72680 AT5G38530 AT3G50740 AT4G22880 AT3G28480 AT4G17788 AT4G39640 AT4G29210 AT1G05010 AT3G55120 AT2G36790 AT1G33030 AT4G39950…
GO:0010035	P	response to inorganic substance	51	1564	279	37767	1.1e-18	8.7e-17	AT3G17790 AT3G09600 AT1G16420 AT2G43790 AT1G20630 AT5G44070 AT3G51860 AT4G20380 AT2G32240 AT5G02490 AT2G23150 AT4G13180 AT5G08300 AT2G45290 AT2G29500 AT3G48090 AT2G41380 AT1G56650 AT3G48450 AT4G39230 AT1G61120 AT5G13740 AT4G02380 AT3G23250 AT5G65750 AT1G32450 AT2G20420 AT4G08500 AT2G37760 AT3G53230 AT1G06180 AT2G16720 AT4G33540 AT3G15352 AT2G28210 AT3G14990 AT4G19030 AT5G51830 AT4G21830 AT4G19880…
GO:0042398	P	cellular amino acid derivative biosynthetic process	46	1564	233	37767	2.1e-18	1.7e-16	AT4G31500 AT4G11280 AT1G01480 AT1G32640 AT5G17990 AT3G19010 AT3G54640 AT4G26200 AT1G80820 AT5G14700 AT3G13650 AT1G64160 AT5G24530 AT5G46845 AT2G37040 AT3G21230 AT5G57890 AT2G39175 AT1G62380 AT4G36220 AT1G56650 AT2G04400 AT4G34230 AT5G13930 AT2G30490 AT1G67980 AT1G72680 AT5G38530 AT4G22880 AT4G17788 AT1G05010 AT3G55120 AT2G36790 AT1G33030 AT2G19590 AT1G69370 AT5G42800 AT1G73500 AT1G76470 AT1G75040…
GO:0012501	P	programmed cell death	47	1564	244	37767	2.5e-18	2e-16	AT4G11280 AT5G58120 AT4G26090 AT3G04210 AT5G44870 AT3G50950 AT4G19510 AT1G29340 AT1G66090 AT4G20380 AT3G44400 AT2G26560 AT5G61900 AT1G17600 AT3G07040 AT4G12720 AT5G41740 AT4G37980 AT3G48090 AT1G56540 AT1G16420 AT5G40910 AT5G66900 AT1G17610 AT3G04220 AT5G11250 AT4G23210 AT5G36930 AT5G46520 AT1G28380 AT5G47910 AT5G22690 AT5G41550 AT1G19250 AT3G54420 AT3G25070 AT3G52400 AT1G69550 AT4G37990 AT5G10380…
GO:0009628	P	response to abiotic stimulus	138	1564	1471	37767	1.4e-17	1.1e-15	AT4G31500 AT5G46050 AT2G43790 AT3G46230 AT3G47520 AT2G33380 AT1G73500 AT5G61900 AT1G51680 AT2G35510 AT4G11150 AT2G31180 AT5G49480 AT3G57260 AT2G26740 AT3G17609 AT2G05710 AT4G29810 AT1G54100 AT5G43170 AT1G18570 AT4G11280 AT5G59310 AT3G50970 AT1G16420 AT1G80820 AT4G17615 AT1G02400 AT2G29110 AT2G29500 AT1G03220 AT1G75040 AT3G55120 AT4G27410 AT2G06850 AT1G48130 AT4G36990 AT5G20230 AT3G22370 AT5G47910…
GO:0009725	P	response to hormone stimulus	103	1564	982	37767	9e-17	6.7e-15	AT5G46050 AT5G47220 AT2G43790 AT2G33380 AT1G73500 AT1G56160 AT5G01550 AT1G69270 AT2G14580 AT4G23260 AT4G17788 AT2G31180 AT3G28580 AT4G09570 AT2G26740 AT4G37790 AT5G01540 AT3G07390 AT5G27420 AT1G63840 AT5G54490 AT2G05710 AT3G14050 AT4G27260 AT5G60360 AT1G64060 AT1G18570 AT4G11280 AT5G59310 AT3G50970 AT1G01560 AT2G28085 AT4G17615 AT3G28210 AT1G06160 AT5G46845 AT4G27410 AT2G06850 AT1G48130 AT4G37610…
GO:0042434	P	indole derivative metabolic process	21	1564	53	37767	9e-16	6.4e-14	AT4G31500 AT5G05730 AT5G57890 AT2G38470 AT4G27070 AT1G73500 AT2G43790 AT4G39950 AT5G57220 AT3G54640 AT2G04400 AT1G59870 AT5G44070 AT2G30770 AT2G44490 AT3G45640 AT1G18570 AT1G69370 AT3G26830 AT5G17990 AT5G38530
GO:0042430	P	indole and derivative metabolic process	21	1564	53	37767	9e-16	6.4e-14	AT4G31500 AT5G05730 AT5G57890 AT2G38470 AT4G27070 AT1G73500 AT2G43790 AT4G39950 AT5G57220 AT3G54640 AT2G04400 AT1G59870 AT5G44070 AT2G30770 AT2G44490 AT3G45640 AT1G18570 AT1G69370 AT3G26830 AT5G17990 AT5G38530
GO:0009751	P	response to salicylic acid stimulus	39	1564	200	37767	1.1e-15	7.6e-14	AT5G46050 AT3G09600 AT1G80840 AT2G37710 AT2G33380 AT4G20380 AT1G72260 AT3G52430 AT5G40990 AT2G14580 AT3G11820 AT3G48090 AT1G74650 AT2G14560 AT2G40000 AT4G14400 AT1G15520 AT4G01370 AT2G31180 AT5G54610 AT5G22570 AT1G06180 AT2G16720 AT3G56400 AT5G13320 AT4G31800 AT1G21250 AT3G52400 AT5G44420 AT1G05560 AT1G76930 AT2G29420 AT4G16890 AT1G21270 AT1G64280 AT1G18570 AT2G25000 AT1G28480 AT3G61190
GO:0009737	P	response to abscisic acid stimulus	55	1564	378	37767	1.7e-15	1.1e-13	AT5G46050 AT1G18890 AT3G50970 AT1G01560 AT2G17290 AT1G32640 AT2G05710 AT2G43790 AT5G59310 AT2G33380 AT3G09600 AT4G17615 AT3G45640 AT3G28210 AT5G01550 AT1G27730 AT1G69270 AT2G39175 AT4G25000 AT4G23260 AT5G46845 AT4G27410 AT4G17788 AT2G47770 AT1G48130 AT4G09570 AT4G01370 AT5G59220 AT5G44120 AT3G28580 AT4G34390 AT1G06180 AT2G16720 AT5G01560 AT2G32020 AT3G15210 AT3G26830 AT5G16600 AT5G01540 AT3G14050…
GO:0010876	P	lipid localization	15	1564	24	37767	1.8e-15	1.2e-13	AT5G59310 AT2G38540 AT3G22600 AT5G48490 AT4G39670 AT5G64080 AT4G22470 AT4G12490 AT4G12480 AT4G12500 AT5G55450 AT5G54740 AT4G22610 AT3G25610 AT4G12470
GO:0051716	P	cellular response to stimulus	90	1564	840	37767	1.8e-15	1.2e-13	AT4G31500 AT4G26090 AT5G45380 AT2G43790 AT3G44320 AT1G73500 AT4G37980 AT1G56160 AT5G61900 AT5G01550 AT1G69270 AT3G49620 AT4G17788 AT1G19180 AT2G47000 AT4G09570 AT5G22570 AT2G02810 AT4G39950 AT5G01540 AT1G71040 AT5G27420 AT3G25070 AT3G52400 AT1G64060 AT1G18570 AT1G28480 AT5G44070 AT4G17615 AT1G72260 AT1G06160 AT5G46845 AT4G29210 AT5G57220 AT5G01560 AT5G13320 AT4G30270 AT2G44490 AT5G47220 AT1G18890…
GO:0007165	P	signal transduction	114	1564	1228	37767	1.3e-14	8.1e-13	AT5G06870 AT1G51660 AT3G04210 AT2G34930 AT5G44870 AT2G43790 AT5G58120 AT1G73500 AT2G32680 AT3G44400 AT5G01550 AT1G69270 AT3G48090 AT4G17788 AT1G19180 AT5G12940 AT5G40170 AT5G11250 AT4G09570 AT5G22570 AT5G36930 AT1G72950 AT5G41550 AT5G01540 AT3G25070 AT3G52400 AT1G57630 AT3G20410 AT1G64060 AT3G05370 AT4G16920 AT1G28480 AT1G01560 AT5G44910 AT1G56160 AT4G17615 AT2G25470 AT1G72260 AT4G29810 AT1G72900…
GO:0009698	P	phenylpropanoid metabolic process	34	1564	175	37767	7.7e-14	4.8e-12	AT1G32640 AT3G13650 AT1G80820 AT5G14700 AT1G64160 AT5G24530 AT5G46845 AT2G37040 AT3G21230 AT1G33030 AT2G39175 AT4G36220 AT3G02130 AT1G56650 AT2G30490 AT4G34230 AT5G13930 AT4G17788 AT1G72680 AT3G50740 AT4G22880 AT1G67980 AT3G55120 AT2G36790 AT3G19010 AT5G42800 AT4G30210 AT1G76470 AT3G21240 AT1G51680 AT1G75040 AT1G66370 AT1G09500 AT3G13610
GO:0006519	P	cellular amino acid and derivative metabolic process	75	1564	682	37767	8.7e-14	5.4e-12	AT4G31500 AT4G11280 AT1G01480 AT1G80820 AT1G32640 AT5G17990 AT3G06300 AT3G54640 AT1G73500 AT3G53180 AT4G20380 AT5G14700 AT1G64160 AT5G24530 AT2G04400 AT4G39980 AT2G37040 AT3G21230 AT4G35630 AT5G57890 AT4G39950 AT2G39175 AT1G62380 AT4G36220 AT1G08630 AT3G02130 AT1G56650 AT5G46845 AT4G34230 AT5G13930 AT2G30490 AT1G67980 AT1G72680 AT3G28480 AT2G43820 AT1G76470 AT5G53460 AT5G38530 AT3G50740 AT4G22880…
GO:0048583	P	regulation of response to stimulus	35	1564	188	37767	1.3e-13	7.6e-12	AT5G47220 AT1G80840 AT4G12720 AT2G43790 AT3G63010 AT4G20380 AT3G45640 AT1G56160 AT3G61190 AT1G59870 AT3G52430 AT5G40990 AT1G74710 AT5G61900 AT3G11820 AT3G05360 AT4G23810 AT5G03730 AT4G09570 AT5G13080 AT3G01080 AT1G02450 AT3G15210 AT1G19250 AT2G18950 AT4G31800 AT3G25070 AT3G52400 AT1G11310 AT5G20480 AT4G39030 AT2G40750 AT1G64280 AT2G25000 AT3G56400
GO:0042435	P	indole derivative biosynthetic process	18	1564	47	37767	2e-13	1.2e-11	AT4G31500 AT5G05730 AT5G57890 AT2G38470 AT4G27070 AT1G73500 AT2G43790 AT4G39950 AT5G57220 AT3G54640 AT2G04400 AT2G30770 AT1G69370 AT3G45640 AT1G18570 AT3G26830 AT5G17990 AT5G38530
GO:0070887	P	cellular response to chemical stimulus	56	1564	452	37767	8.6e-13	5e-11	AT5G47220 AT1G18890 AT2G17290 AT1G32640 AT2G43790 AT3G23230 AT1G73500 AT3G63010 AT2G44840 AT4G20380 AT4G17615 AT3G45640 AT1G56160 AT1G72260 AT3G52430 AT5G01550 AT5G40990 AT1G69270 AT4G16890 AT1G74670 AT1G06160 AT1G56650 AT5G46845 AT3G48090 AT3G23240 AT4G17788 AT4G02380 AT3G15500 AT1G19180 AT2G47000 AT4G01370 AT4G39400 AT5G47230 AT5G03730 AT4G29210 AT4G09570 AT5G22570 AT5G01540 AT3G56400 AT5G01560…
GO:0009699	P	phenylpropanoid biosynthetic process	29	1564	141	37767	1.1e-12	6.2e-11	AT1G32640 AT3G13650 AT1G80820 AT5G14700 AT1G64160 AT5G24530 AT5G46845 AT2G37040 AT3G21230 AT1G33030 AT2G39175 AT4G36220 AT1G56650 AT2G30490 AT4G34230 AT5G13930 AT4G17788 AT1G72680 AT4G22880 AT1G67980 AT3G55120 AT2G36790 AT3G19010 AT5G42800 AT1G76470 AT1G75040 AT1G66370 AT1G09500 AT3G13610
GO:0002682	P	regulation of immune system process	16	1564	41	37767	3.1e-12	1.7e-10	AT5G47220 AT5G40990 AT1G19250 AT1G80840 AT4G31800 AT3G25070 AT4G12720 AT3G52400 AT2G43790 AT5G20480 AT3G11820 AT3G56400 AT1G56160 AT1G02450 AT3G05360 AT3G15210
GO:0050776	P	regulation of immune response	16	1564	41	37767	3.1e-12	1.7e-10	AT5G47220 AT5G40990 AT1G19250 AT1G80840 AT4G31800 AT3G25070 AT4G12720 AT3G52400 AT2G43790 AT5G20480 AT3G11820 AT3G56400 AT1G56160 AT1G02450 AT3G05360 AT3G15210
GO:0009651	P	response to salt stress	48	1564	366	37767	4.3e-12	2.3e-10	AT5G46050 AT3G09600 AT4G08500 AT2G38470 AT4G12720 AT5G59820 AT2G05710 AT2G43790 AT2G33380 AT1G73500 AT5G67450 AT4G17615 AT1G55450 AT2G41010 AT1G03220 AT2G35510 AT1G56650 AT2G47770 AT4G37530 AT4G01370 AT2G30250 AT2G31180 AT5G50950 AT5G49480 AT5G47030 AT1G06180 AT1G28380 AT1G53240 AT3G14440 AT1G73260 AT3G08720 AT1G27730 AT5G46180 AT2G20360 AT2G16500 AT4G16260 AT2G16720 AT1G54100 AT5G27600 AT4G23600…
GO:0006970	P	response to osmotic stress	51	1564	408	37767	6e-12	3.2e-10	AT5G46050 AT3G09600 AT4G08500 AT2G38470 AT4G12720 AT5G59820 AT2G05710 AT2G43790 AT5G20830 AT2G33380 AT1G73500 AT5G67450 AT4G17615 AT3G45640 AT1G55450 AT2G41010 AT1G03220 AT2G35510 AT1G56650 AT5G67590 AT2G47770 AT4G37530 AT4G01370 AT2G30250 AT2G31180 AT5G50950 AT5G49480 AT5G47030 AT1G06180 AT1G28380 AT1G53240 AT3G14440 AT1G73260 AT3G08720 AT1G27730 AT5G46180 AT2G20360 AT2G16500 AT4G16260 AT2G16720…
GO:0034641	P	cellular nitrogen compound metabolic process	57	1564	506	37767	2.5e-11	1.3e-09	AT4G31500 AT5G26030 AT1G01480 AT2G38470 AT4G11280 AT2G43790 AT4G39950 AT3G54640 AT1G73500 AT3G53180 AT4G20380 AT3G45640 AT1G17745 AT1G69370 AT4G39980 AT5G53460 AT3G51430 AT4G35630 AT5G57890 AT1G62380 AT3G21070 AT1G08630 AT5G17990 AT2G04400 AT3G51440 AT1G19670 AT3G26830 AT2G43820 AT5G40760 AT5G38530 AT1G05560 AT5G48180 AT5G22630 AT1G09940 AT1G05010 AT3G30775 AT5G22300 AT5G11670 AT3G44720 AT3G14990…
GO:0052542	P	callose deposition during defense response	11	1564	19	37767	3.5e-11	1.8e-09	AT4G31500 AT1G18570 AT5G57220 AT5G46330 AT3G54640 AT5G44070 AT1G28380 AT1G64060 AT4G39950 AT2G44490 AT1G59870
GO:0009415	P	response to water	36	1564	240	37767	4e-11	2e-09	AT5G59310 AT3G50970 AT2G38470 AT1G32640 AT5G20830 AT1G30270 AT2G33380 AT4G17615 AT5G45340 AT5G61900 AT2G41010 AT1G27730 AT3G52450 AT3G15500 AT4G27410 AT4G26070 AT4G02380 AT1G48130 AT1G02930 AT1G33560 AT5G59220 AT2G46140 AT3G45140 AT3G14440 AT2G26740 AT3G09940 AT4G02200 AT1G52890 AT1G54100 AT2G35930 AT5G58670 AT5G66400 AT5G05410 AT3G25760 AT2G46680 AT2G47800
GO:0009816	P	defense response to bacterium, incompatible interaction	14	1564	35	37767	4.7e-11	2.3e-09	AT3G52430 AT5G13320 AT4G11650 AT3G25070 AT5G45110 AT4G11850 AT4G19660 AT5G26920 AT1G55020 AT4G16890 AT4G23190 AT4G23810 AT2G40000 AT4G14400
GO:0009266	P	response to temperature stimulus	54	1564	485	37767	1.2e-10	6.1e-09	AT5G20630 AT3G50970 AT4G08500 AT2G38470 AT5G20830 AT2G43790 AT3G46230 AT3G47520 AT2G33380 AT3G24440 AT1G80820 AT5G67450 AT4G17615 AT3G45640 AT5G02490 AT1G55920 AT2G29500 AT1G27730 AT5G61900 AT4G34150 AT2G40140 AT1G09090 AT5G59820 AT5G67590 AT4G02380 AT4G36990 AT4G11150 AT5G52640 AT4G01370 AT2G30250 AT5G47230 AT5G45710 AT5G02500 AT3G57260 AT3G22370 AT1G53240 AT5G47910 AT3G61190 AT1G17190 AT3G08720…
GO:0033037	P	polysaccharide localization	11	1564	21	37767	1.5e-10	7.3e-09	AT4G31500 AT1G18570 AT5G57220 AT5G46330 AT3G54640 AT5G44070 AT1G28380 AT1G64060 AT4G39950 AT2G44490 AT1G59870
GO:0052545	P	callose localization	11	1564	21	37767	1.5e-10	7.3e-09	AT4G31500 AT1G18570 AT5G57220 AT5G46330 AT3G54640 AT5G44070 AT1G28380 AT1G64060 AT4G39950 AT2G44490 AT1G59870
GO:0045088	P	regulation of innate immune response	14	1564	38	37767	1.7e-10	8.2e-09	AT5G47220 AT5G40990 AT1G19250 AT3G25070 AT4G12720 AT3G52400 AT2G43790 AT5G20480 AT3G11820 AT3G56400 AT1G56160 AT1G02450 AT3G05360 AT3G15210
GO:0009414	P	response to water deprivation	34	1564	229	37767	1.8e-10	8.3e-09	AT5G59310 AT3G50970 AT2G38470 AT1G32640 AT1G30270 AT2G33380 AT4G17615 AT5G45340 AT2G41010 AT1G27730 AT3G52450 AT3G15500 AT4G27410 AT4G26070 AT4G02380 AT1G48130 AT1G02930 AT1G33560 AT5G59220 AT2G46140 AT3G45140 AT3G14440 AT2G26740 AT3G09940 AT4G02200 AT1G52890 AT1G54100 AT2G35930 AT5G58670 AT5G66400 AT5G05410 AT3G25760 AT2G46680 AT2G47800
GO:0009627	P	systemic acquired resistance	16	1564	54	37767	3.7e-10	1.7e-08	AT4G01370 AT3G52430 AT1G74710 AT4G12470 AT3G48090 AT1G75040 AT2G14610 AT3G57260 AT4G16890 AT1G19250 AT4G20380 AT3G56400 AT1G64280 AT1G02450 AT3G04720 AT1G59870
GO:0034050	P	host programmed cell death induced by symbiont	16	1564	55	37767	5.1e-10	2.3e-08	AT5G61900 AT3G07040 AT4G26090 AT3G25070 AT4G12720 AT3G52400 AT4G23210 AT4G37990 AT4G37980 AT3G54420 AT3G48090 AT3G11820 AT1G19250 AT4G20380 AT1G28380 AT2G26560
GO:0009626	P	plant-type hypersensitive response	16	1564	55	37767	5.1e-10	2.3e-08	AT5G61900 AT3G07040 AT4G26090 AT3G25070 AT4G12720 AT3G52400 AT4G23210 AT4G37990 AT4G37980 AT3G54420 AT3G48090 AT3G11820 AT1G19250 AT4G20380 AT1G28380 AT2G26560
GO:0009987	P	cellular process	644	1564	11684	37767	5.2e-10	2.3e-08	AT1G61580 AT5G06870 AT1G51660 AT5G44870 AT5G61560 AT3G44320 AT3G50950 AT1G73500 AT1G28390 AT4G23550 AT3G14990 AT1G56160 AT1G67470 AT3G59350 AT3G51430 AT1G22810 AT1G08630 AT2G47800 AT5G48380 AT1G19180 AT5G15730 AT5G55170 AT5G34930 AT4G04500 AT2G02390 AT1G05010 AT2G19130 AT1G19670 AT3G13650 AT3G07390 AT5G27420 AT4G23150 AT3G52400 AT5G10380 AT1G66370 AT5G63410 AT1G09500 AT3G05370 AT3G14090 AT4G16920…
GO:0007242	P	intracellular signaling cascade	64	1564	659	37767	8.2e-10	3.5e-08	AT5G47220 AT1G18890 AT4G08500 AT2G17290 AT4G12720 AT5G20480 AT2G43790 AT3G23230 AT1G73500 AT3G63010 AT2G44840 AT4G20380 AT4G17615 AT3G45640 AT1G56160 AT1G72260 AT3G52430 AT5G01550 AT5G40990 AT1G51660 AT1G69270 AT4G16890 AT1G74670 AT1G32640 AT1G06160 AT1G56650 AT5G46845 AT3G48090 AT3G23240 AT4G17788 AT3G15500 AT1G19180 AT3G05360 AT1G22280 AT2G47000 AT4G01370 AT4G39400 AT5G47230 AT2G37970 AT5G03730…
GO:0006790	P	sulfur metabolic process	32	1564	220	37767	1e-09	4.3e-08	AT4G31500 AT4G11280 AT1G01480 AT2G38470 AT5G64000 AT4G39940 AT2G43790 AT3G44320 AT1G73500 AT5G44070 AT2G30770 AT3G45640 AT1G59870 AT1G62380 AT1G05010 AT1G62570 AT5G48180 AT4G14680 AT4G39640 AT4G29210 AT5G57220 AT4G04610 AT1G18590 AT4G39950 AT1G67810 AT3G14990 AT3G26830 AT1G74100 AT2G44490 AT1G18570 AT2G19590 AT4G26200
GO:0009723	P	response to ethylene stimulus	30	1564	199	37767	1.4e-09	5.8e-08	AT5G05730 AT3G23230 AT3G09600 AT4G11280 AT2G43790 AT5G47220 AT5G47230 AT1G73500 AT2G44840 AT4G20380 AT1G56160 AT5G40990 AT2G14580 AT1G06160 AT3G23240 AT1G64060 AT1G15520 AT2G31180 AT5G03730 AT1G06180 AT2G16720 AT3G15210 AT4G17490 AT5G44420 AT1G62380 AT5G60360 AT3G23250 AT1G18570 AT3G04720 AT3G12500
GO:0010120	P	camalexin biosynthetic process	7	1564	8	37767	1.6e-09	6.7e-08	AT2G38470 AT2G43790 AT4G39950 AT1G73500 AT2G30770 AT3G45640 AT3G26830
GO:0052317	P	camalexin metabolic process	7	1564	8	37767	1.6e-09	6.7e-08	AT2G38470 AT2G43790 AT4G39950 AT1G73500 AT2G30770 AT3G45640 AT3G26830
GO:0009072	P	aromatic amino acid family metabolic process	17	1564	68	37767	2e-09	8e-08	AT4G31500 AT5G05730 AT5G34930 AT5G57890 AT5G22630 AT2G43820 AT5G17990 AT4G39950 AT1G05560 AT3G54640 AT2G04400 AT1G22410 AT3G44720 AT1G69370 AT4G27070 AT4G39980 AT5G38530
GO:0006915	P	apoptosis	26	1564	159	37767	2.8e-09	1.1e-07	AT4G11280 AT5G58120 AT3G04210 AT5G44870 AT3G50950 AT1G29340 AT1G66090 AT3G44400 AT1G17600 AT5G46520 AT5G41740 AT1G56540 AT5G40910 AT5G66900 AT1G17610 AT3G04220 AT5G11250 AT5G36930 AT4G19510 AT5G22690 AT5G41550 AT1G69550 AT4G16920 AT1G59124 AT1G63750 AT1G15890
GO:0031349	P	positive regulation of defense response	12	1564	34	37767	6.2e-09	2.4e-07	AT5G61900 AT5G47220 AT5G40990 AT1G19250 AT3G25070 AT4G12720 AT2G43790 AT5G20480 AT3G56400 AT1G56160 AT3G05360 AT3G15210
GO:0043648	P	dicarboxylic acid metabolic process	18	1564	82	37767	6.3e-09	2.5e-07	AT4G31500 AT2G13560 AT5G57890 AT4G27070 AT5G34930 AT5G17990 AT5G22630 AT3G54640 AT5G58330 AT5G05730 AT1G22410 AT5G11670 AT3G44720 AT1G69370 AT2G04400 AT4G39980 AT4G00570 AT5G38530
GO:0052544	P	callose deposition in cell wall during defense response	9	1564	17	37767	6.6e-09	2.5e-07	AT4G31500 AT5G57220 AT5G46330 AT3G54640 AT5G44070 AT2G44490 AT4G39950 AT1G18570 AT1G59870
GO:0052482	P	cell wall thickening during defense response	9	1564	17	37767	6.6e-09	2.5e-07	AT4G31500 AT5G57220 AT5G46330 AT3G54640 AT5G44070 AT2G44490 AT4G39950 AT1G18570 AT1G59870
GO:0043436	P	oxoacid metabolic process	74	1564	859	37767	8.2e-09	3e-07	AT4G31500 AT5G55120 AT5G22630 AT1G01480 AT4G11280 AT1G22410 AT3G06300 AT2G47240 AT3G54640 AT2G33380 AT5G58330 AT3G53180 AT4G20380 AT1G02400 AT1G05560 AT4G39950 AT2G04400 AT4G39980 AT1G17745 AT4G35630 AT5G57890 AT5G36880 AT3G13930 AT1G62380 AT5G45340 AT2G06050 AT1G08630 AT5G17990 AT5G26920 AT5G07010 AT4G15440 AT2G43820 AT4G00570 AT5G53460 AT5G38530 AT3G28480 AT1G64400 AT5G03730 AT5G27520 AT4G34250…
GO:0019752	P	carboxylic acid metabolic process	74	1564	859	37767	8.2e-09	3e-07	AT4G31500 AT5G55120 AT5G22630 AT1G01480 AT4G11280 AT1G22410 AT3G06300 AT2G47240 AT3G54640 AT2G33380 AT5G58330 AT3G53180 AT4G20380 AT1G02400 AT1G05560 AT4G39950 AT2G04400 AT4G39980 AT1G17745 AT4G35630 AT5G57890 AT5G36880 AT3G13930 AT1G62380 AT5G45340 AT2G06050 AT1G08630 AT5G17990 AT5G26920 AT5G07010 AT4G15440 AT2G43820 AT4G00570 AT5G53460 AT5G38530 AT3G28480 AT1G64400 AT5G03730 AT5G27520 AT4G34250…
GO:0006082	P	organic acid metabolic process	74	1564	860	37767	8.6e-09	3.2e-07	AT4G31500 AT5G55120 AT5G22630 AT1G01480 AT4G11280 AT1G22410 AT3G06300 AT2G47240 AT3G54640 AT2G33380 AT5G58330 AT3G53180 AT4G20380 AT1G02400 AT1G05560 AT4G39950 AT2G04400 AT4G39980 AT1G17745 AT4G35630 AT5G57890 AT5G36880 AT3G13930 AT1G62380 AT5G45340 AT2G06050 AT1G08630 AT5G17990 AT5G26920 AT5G07010 AT4G15440 AT2G43820 AT4G00570 AT5G53460 AT5G38530 AT3G28480 AT1G64400 AT5G03730 AT5G27520 AT4G34250…
GO:0042180	P	cellular ketone metabolic process	75	1564	882	37767	1.1e-08	4.1e-07	AT4G31500 AT5G55120 AT5G22630 AT1G01480 AT4G11280 AT1G22410 AT3G06300 AT2G47240 AT3G54640 AT2G33380 AT5G58330 AT3G53180 AT4G20380 AT1G02400 AT1G05560 AT4G39950 AT2G04400 AT4G39980 AT1G17745 AT4G35630 AT5G57890 AT5G36880 AT3G13930 AT1G62380 AT5G45340 AT2G06050 AT1G08630 AT5G17990 AT5G26920 AT5G07010 AT5G13930 AT4G15440 AT2G43820 AT4G00570 AT5G53460 AT5G38530 AT3G28480 AT1G64400 AT5G03730 AT5G27520…
GO:0008152	P	metabolic process	577	1564	10614	37767	1.2e-08	4.4e-07	AT1G61580 AT5G61560 AT3G44320 AT1G73500 AT1G28390 AT4G23550 AT1G02450 AT1G56160 AT1G67470 AT3G59350 AT3G51430 AT1G22810 AT1G08630 AT1G30620 AT5G15730 AT5G55170 AT5G34930 AT4G04500 AT2G02390 AT1G05010 AT2G19130 AT5G19110 AT4G15100 AT1G19670 AT3G13650 AT4G23150 AT2G47140 AT1G51780 AT1G66370 AT5G63410 AT1G09500 AT3G06420 AT4G11280 AT5G22060 AT2G24850 AT1G02400 AT2G32030 AT5G46350 AT2G33710 AT2G32150…
GO:0009817	P	defense response to fungus, incompatible interaction	12	1564	36	37767	1.3e-08	4.6e-07	AT3G21630 AT2G39200 AT1G11310 AT1G29340 AT4G19660 AT5G45110 AT2G44490 AT1G61560 AT4G16950 AT1G56510 AT4G16860 AT1G59870
GO:0009409	P	response to cold	38	1564	328	37767	2e-08	7e-07	AT5G20630 AT3G50970 AT4G08500 AT2G38470 AT5G59820 AT2G43790 AT5G20830 AT3G47520 AT2G33380 AT3G24440 AT1G80820 AT5G67450 AT4G17615 AT3G45640 AT1G27730 AT4G34150 AT2G40140 AT5G67590 AT4G02380 AT4G11150 AT4G01370 AT2G30250 AT5G47230 AT5G02500 AT3G57260 AT3G22370 AT1G53240 AT3G61190 AT1G17190 AT3G08720 AT2G16500 AT5G66400 AT1G09560 AT5G58670 AT4G29810 AT5G43170 AT4G34710 AT1G55920
GO:0002684	P	positive regulation of immune system process	11	1564	31	37767	2.5e-08	7.5e-07	AT5G47220 AT5G40990 AT1G19250 AT3G25070 AT4G12720 AT2G43790 AT5G20480 AT3G56400 AT1G56160 AT3G05360 AT3G15210
GO:0042431	P	indole metabolic process	7	1564	10	37767	2.3e-08	7.5e-07	AT2G38470 AT2G43790 AT4G39950 AT1G73500 AT2G30770 AT3G45640 AT3G26830
GO:0052314	P	phytoalexin metabolic process	7	1564	10	37767	2.3e-08	7.5e-07	AT2G38470 AT2G43790 AT4G39950 AT1G73500 AT2G30770 AT3G45640 AT3G26830
GO:0045089	P	positive regulation of innate immune response	11	1564	31	37767	2.5e-08	7.5e-07	AT5G47220 AT5G40990 AT1G19250 AT3G25070 AT4G12720 AT2G43790 AT5G20480 AT3G56400 AT1G56160 AT3G05360 AT3G15210
GO:0052315	P	phytoalexin biosynthetic process	7	1564	10	37767	2.3e-08	7.5e-07	AT2G38470 AT2G43790 AT4G39950 AT1G73500 AT2G30770 AT3G45640 AT3G26830
GO:0009700	P	indole phytoalexin biosynthetic process	7	1564	10	37767	2.3e-08	7.5e-07	AT2G38470 AT2G43790 AT4G39950 AT1G73500 AT2G30770 AT3G45640 AT3G26830
GO:0009404	P	toxin metabolic process	14	1564	53	37767	2.4e-08	7.5e-07	AT1G10370 AT2G29440 AT2G02390 AT2G29470 AT2G29460 AT3G09270 AT1G27130 AT2G29420 AT1G17170 AT1G69930 AT1G17190 AT5G17220 AT1G74590 AT1G02930
GO:0009407	P	toxin catabolic process	14	1564	53	37767	2.4e-08	7.5e-07	AT1G10370 AT2G29440 AT2G02390 AT2G29470 AT2G29460 AT3G09270 AT1G27130 AT2G29420 AT1G17170 AT1G69930 AT1G17190 AT5G17220 AT1G74590 AT1G02930
GO:0031540	P	regulation of anthocyanin biosynthetic process	7	1564	10	37767	2.3e-08	7.5e-07	AT2G39175 AT1G75040 AT1G56650 AT5G46845 AT1G66370 AT5G13930 AT4G17788
GO:0052543	P	callose deposition in cell wall	9	1564	19	37767	2.3e-08	7.5e-07	AT4G31500 AT5G57220 AT5G46330 AT3G54640 AT5G44070 AT2G44490 AT4G39950 AT1G18570 AT1G59870
GO:0050778	P	positive regulation of immune response	11	1564	31	37767	2.5e-08	7.5e-07	AT5G47220 AT5G40990 AT1G19250 AT3G25070 AT4G12720 AT2G43790 AT5G20480 AT3G56400 AT1G56160 AT3G05360 AT3G15210
GO:0002218	P	activation of innate immune response	11	1564	31	37767	2.5e-08	7.5e-07	AT5G47220 AT5G40990 AT1G19250 AT3G25070 AT4G12720 AT2G43790 AT5G20480 AT3G56400 AT1G56160 AT3G05360 AT3G15210
GO:0046217	P	indole phytoalexin metabolic process	7	1564	10	37767	2.3e-08	7.5e-07	AT2G38470 AT2G43790 AT4G39950 AT1G73500 AT2G30770 AT3G45640 AT3G26830
GO:0002253	P	activation of immune response	11	1564	31	37767	2.5e-08	7.5e-07	AT5G47220 AT5G40990 AT1G19250 AT3G25070 AT4G12720 AT2G43790 AT5G20480 AT3G56400 AT1G56160 AT3G05360 AT3G15210
GO:0002252	P	immune effector process	11	1564	31	37767	2.5e-08	7.5e-07	AT1G80840 AT4G31800 AT3G52450 AT5G06320 AT3G11650 AT2G35930 AT1G64060 AT5G24590 AT3G11840 AT2G26560 AT2G35980
GO:0065007	P	biological regulation	253	1564	4188	37767	2.8e-08	8.5e-07	AT4G31500 AT5G49520 AT5G06870 AT1G80840 AT1G51660 AT3G04210 AT2G34930 AT5G44870 AT2G43790 AT1G29330 AT2G20900 AT1G18890 AT4G37790 AT3G46600 AT5G18600 AT4G23550 AT4G27260 AT2G32680 AT5G46350 AT2G37430 AT3G53600 AT5G01550 AT4G29810 AT1G69270 AT1G22810 AT2G40740 AT4G01610 AT3G48090 AT2G17500 AT4G17788 AT1G51700 AT3G51375 AT1G19180 AT5G22650 AT5G12940 AT4G23810 AT2G31180 AT5G06860 AT5G11250 AT4G09570…
GO:0042343	P	indole glucosinolate metabolic process	6	1564	7	37767	3.4e-08	1e-06	AT4G31500 AT5G57220 AT5G44070 AT2G44490 AT1G18570 AT1G59870
GO:0031407	P	oxylipin metabolic process	12	1564	39	37767	3.6e-08	1.1e-06	AT1G55020 AT5G07010 AT5G42650 AT2G06050 AT2G33380 AT3G45140 AT3G25760 AT4G16760 AT3G25780 AT1G17420 AT2G26560 AT1G72520
GO:0052386	P	cell wall thickening	9	1564	20	37767	4.1e-08	1.2e-06	AT4G31500 AT5G57220 AT5G46330 AT3G54640 AT5G44070 AT2G44490 AT4G39950 AT1G18570 AT1G59870
GO:0009962	P	regulation of flavonoid biosynthetic process	8	1564	15	37767	4.4e-08	1.3e-06	AT2G39175 AT1G32640 AT1G75040 AT1G56650 AT5G46845 AT1G66370 AT5G13930 AT4G17788
GO:0033554	P	cellular response to stress	42	1564	399	37767	5.9e-08	1.7e-06	AT4G31500 AT4G26090 AT4G12720 AT5G45380 AT2G43790 AT3G44320 AT5G46330 AT3G54640 AT5G44070 AT4G20380 AT1G55920 AT3G45640 AT2G26560 AT1G04980 AT1G59870 AT5G61900 AT3G07040 AT1G77510 AT3G48090 AT1G32640 AT1G56650 AT3G49620 AT4G37980 AT4G02380 AT5G57220 AT3G54420 AT1G28380 AT5G13080 AT4G39950 AT3G47340 AT1G42990 AT2G02810 AT1G19250 AT1G71040 AT3G25070 AT3G52400 AT4G37990 AT3G11820 AT2G44490 AT1G20630…
GO:0046417	P	chorismate metabolic process	14	1564	57	37767	6.5e-08	1.8e-06	AT4G31500 AT5G05730 AT5G57890 AT5G22630 AT5G34930 AT5G17990 AT3G54640 AT2G04400 AT1G22410 AT3G44720 AT1G69370 AT4G27070 AT4G39980 AT5G38530
GO:0009073	P	aromatic amino acid family biosynthetic process	14	1564	57	37767	6.5e-08	1.8e-06	AT4G31500 AT5G05730 AT5G57890 AT5G22630 AT5G34930 AT5G17990 AT3G54640 AT2G04400 AT1G22410 AT3G44720 AT1G69370 AT4G27070 AT4G39980 AT5G38530
GO:0009718	P	anthocyanin biosynthetic process	9	1564	21	37767	6.8e-08	1.9e-06	AT4G22880 AT2G39175 AT1G75040 AT1G56650 AT5G46845 AT1G66370 AT5G13930 AT4G17788 AT5G42800
GO:0009867	P	jasmonic acid mediated signaling pathway	13	1564	49	37767	7.1e-08	2e-06	AT4G01370 AT5G47220 AT1G32640 AT3G52400 AT2G43790 AT3G15500 AT3G11820 AT3G23240 AT3G56400 AT1G72260 AT1G19180 AT3G15210 AT1G28480
GO:0042775	P	mitochondrial ATP synthesis coupled electron transport	10	1564	28	37767	1e-07	2.7e-06	AT5G08530 AT5G40650 AT2G02050 AT2G18450 AT4G02580 AT5G18800 AT5G66760 AT3G52730 AT3G27380 AT4G32470
GO:0042773	P	ATP synthesis coupled electron transport	10	1564	28	37767	1e-07	2.7e-06	AT5G08530 AT5G40650 AT2G02050 AT2G18450 AT4G02580 AT5G18800 AT5G66760 AT3G52730 AT3G27380 AT4G32470
GO:0031348	P	negative regulation of defense response	9	1564	22	37767	1.1e-07	3e-06	AT3G52430 AT1G74710 AT3G52400 AT1G11310 AT3G11820 AT3G61190 AT1G64280 AT4G39030 AT1G59870
GO:0009595	P	detection of biotic stimulus	5	1564	5	37767	1.2e-07	3.3e-06	AT5G13320 AT3G21630 AT5G46330 AT5G20480 AT4G26090
GO:0045730	P	respiratory burst	5	1564	5	37767	1.2e-07	3.3e-06	AT5G64120 AT2G35930 AT1G64060 AT3G11840 AT3G52450
GO:0050794	P	regulation of cellular process	207	1564	3375	37767	1.3e-07	3.5e-06	AT5G49520 AT1G64380 AT5G06870 AT1G80840 AT1G51660 AT3G04210 AT2G34930 AT5G44870 AT2G43790 AT2G20900 AT3G21150 AT4G37790 AT3G46600 AT5G18600 AT4G23550 AT2G32680 AT5G46350 AT2G37430 AT3G53600 AT5G01550 AT1G69270 AT1G22810 AT2G40740 AT3G48090 AT4G17788 AT1G51700 AT1G19180 AT5G22650 AT5G12940 AT4G23810 AT2G31180 AT5G06860 AT5G11250 AT4G09570 AT5G22570 AT5G36930 AT3G47640 AT1G19250 AT3G56980 AT3G17609…
GO:0006586	P	indolalkylamine metabolic process	10	1564	29	37767	1.5e-07	3.8e-06	AT4G31500 AT5G05730 AT5G57890 AT5G17990 AT3G54640 AT2G04400 AT4G39950 AT1G69370 AT4G27070 AT5G38530
GO:0006568	P	tryptophan metabolic process	10	1564	29	37767	1.5e-07	3.8e-06	AT4G31500 AT5G05730 AT5G57890 AT5G17990 AT3G54640 AT2G04400 AT4G39950 AT1G69370 AT4G27070 AT5G38530
GO:0044237	P	cellular metabolic process	473	1564	8722	37767	1.6e-07	4.1e-06	AT1G61580 AT5G61560 AT3G44320 AT1G73500 AT1G28390 AT4G23550 AT3G14990 AT1G56160 AT1G67470 AT3G59350 AT3G51430 AT1G22810 AT1G08630 AT1G30620 AT5G15730 AT5G55170 AT5G34930 AT4G04500 AT2G02390 AT1G05010 AT2G19130 AT1G19670 AT3G13650 AT4G23150 AT1G66370 AT5G63410 AT1G09500 AT3G06420 AT4G11280 AT5G22060 AT1G02400 AT5G46350 AT2G33710 AT3G55120 AT1G67980 AT4G29690 AT3G62600 AT1G17190 AT2G19590 AT3G26830…
GO:0046394	P	carboxylic acid biosynthetic process	42	1564	417	37767	2e-07	5e-06	AT4G31500 AT5G55120 AT5G05730 AT5G17990 AT4G39950 AT2G47240 AT3G54640 AT3G53180 AT1G17745 AT5G26920 AT4G39980 AT5G53460 AT4G35630 AT5G57890 AT5G42650 AT2G26560 AT2G06050 AT5G22630 AT2G04400 AT4G16760 AT4G39030 AT5G34930 AT1G64400 AT5G03730 AT4G34250 AT3G30775 AT3G45140 AT1G74710 AT3G44720 AT3G25780 AT1G69370 AT5G46180 AT1G22410 AT2G18950 AT1G17420 AT1G55020 AT3G14440 AT3G25760 AT5G38710 AT5G38530…
GO:0016053	P	organic acid biosynthetic process	42	1564	417	37767	2e-07	5e-06	AT4G31500 AT5G55120 AT5G05730 AT5G17990 AT4G39950 AT2G47240 AT3G54640 AT3G53180 AT1G17745 AT5G26920 AT4G39980 AT5G53460 AT4G35630 AT5G57890 AT5G42650 AT2G26560 AT2G06050 AT5G22630 AT2G04400 AT4G16760 AT4G39030 AT5G34930 AT1G64400 AT5G03730 AT4G34250 AT3G30775 AT3G45140 AT1G74710 AT3G44720 AT3G25780 AT1G69370 AT5G46180 AT1G22410 AT2G18950 AT1G17420 AT1G55020 AT3G14440 AT3G25760 AT5G38710 AT5G38530…
GO:0048584	P	positive regulation of response to stimulus	14	1564	62	37767	2e-07	5.1e-06	AT5G61900 AT5G47220 AT5G40990 AT1G19250 AT3G25070 AT4G12720 AT4G09570 AT5G20480 AT3G15210 AT3G63010 AT3G56400 AT1G56160 AT3G05360 AT2G43790
GO:0009863	P	salicylic acid mediated signaling pathway	12	1564	45	37767	2.1e-07	5.2e-06	AT4G01370 AT5G13320 AT3G48090 AT3G52400 AT5G22570 AT4G16890 AT3G11820 AT4G20380 AT3G56400 AT1G64280 AT1G28480 AT3G52430
GO:0010038	P	response to metal ion	29	1564	238	37767	2.9e-07	7.2e-06	AT3G09600 AT5G44070 AT3G51860 AT2G32240 AT5G02490 AT2G23150 AT5G08300 AT2G45290 AT2G41380 AT4G39230 AT5G13740 AT5G65750 AT2G20420 AT4G08500 AT2G37760 AT3G53230 AT1G06180 AT2G16720 AT1G53240 AT3G15352 AT3G14990 AT5G51830 AT4G19880 AT4G26970 AT5G08680 AT2G05710 AT5G67330 AT3G23250 AT1G16150
GO:0032870	P	cellular response to hormone stimulus	35	1564	321	37767	3e-07	7.2e-06	AT5G47220 AT1G18890 AT2G17290 AT3G23230 AT1G73500 AT3G63010 AT2G44840 AT4G20380 AT4G17615 AT3G45640 AT1G56160 AT5G01550 AT5G40990 AT1G69270 AT1G74670 AT1G06160 AT5G46845 AT3G23240 AT4G17788 AT2G47000 AT4G39400 AT5G47230 AT5G03730 AT4G09570 AT5G01560 AT3G15210 AT5G01540 AT2G39175 AT4G17490 AT4G33430 AT5G58670 AT4G30270 AT1G64060 AT2G46680 AT3G12500
GO:0009755	P	hormone-mediated signaling pathway	35	1564	321	37767	3e-07	7.2e-06	AT5G47220 AT1G18890 AT2G17290 AT3G23230 AT1G73500 AT3G63010 AT2G44840 AT4G20380 AT4G17615 AT3G45640 AT1G56160 AT5G01550 AT5G40990 AT1G69270 AT1G74670 AT1G06160 AT5G46845 AT3G23240 AT4G17788 AT2G47000 AT4G39400 AT5G47230 AT5G03730 AT4G09570 AT5G01560 AT3G15210 AT5G01540 AT2G39175 AT4G17490 AT4G33430 AT5G58670 AT4G30270 AT1G64060 AT2G46680 AT3G12500
GO:0009873	P	ethylene mediated signaling pathway	15	1564	74	37767	3.4e-07	8.2e-06	AT5G47220 AT3G23230 AT4G17490 AT5G03730 AT3G23240 AT5G47230 AT1G06160 AT1G73500 AT2G44840 AT1G64060 AT1G56160 AT4G20380 AT3G12500 AT3G15210 AT5G40990
GO:0009808	P	lignin metabolic process	12	1564	47	37767	3.5e-07	8.5e-06	AT3G50740 AT1G33030 AT1G76470 AT4G36220 AT3G02130 AT5G14700 AT2G30490 AT4G34230 AT1G80820 AT1G67980 AT1G72680 AT1G09500
GO:0000162	P	tryptophan biosynthetic process	9	1564	25	37767	4.1e-07	9.6e-06	AT4G31500 AT5G05730 AT5G57890 AT5G17990 AT3G54640 AT2G04400 AT1G69370 AT5G38530 AT4G27070
GO:0046219	P	indolalkylamine biosynthetic process	9	1564	25	37767	4.1e-07	9.6e-06	AT4G31500 AT5G05730 AT5G57890 AT5G17990 AT3G54640 AT2G04400 AT1G69370 AT5G38530 AT4G27070
GO:0031408	P	oxylipin biosynthetic process	10	1564	32	37767	4.2e-07	9.9e-06	AT1G55020 AT5G42650 AT2G06050 AT3G45140 AT3G25760 AT4G16760 AT3G25780 AT1G17420 AT2G26560 AT1G72520
GO:0046686	P	response to cadmium ion	24	1564	178	37767	4.7e-07	1.1e-05	AT3G09600 AT5G44070 AT2G32240 AT5G02490 AT5G08300 AT2G45290 AT2G41380 AT4G39230 AT5G65750 AT2G20420 AT4G08500 AT2G37760 AT3G53230 AT1G06180 AT2G16720 AT1G53240 AT3G14990 AT5G51830 AT4G19880 AT4G26970 AT5G08680 AT2G05710 AT3G23250 AT1G16150
GO:0050789	P	regulation of biological process	220	1564	3697	37767	4.8e-07	1.1e-05	AT5G49520 AT1G64380 AT5G06870 AT1G80840 AT1G51660 AT3G04210 AT2G34930 AT5G44870 AT2G43790 AT2G20900 AT3G21150 AT4G37790 AT3G46600 AT5G18600 AT4G23550 AT2G32680 AT5G46350 AT2G37430 AT3G53600 AT5G01550 AT1G69270 AT1G22810 AT2G40740 AT3G48090 AT4G17788 AT1G51700 AT3G51375 AT1G19180 AT5G22650 AT5G12940 AT4G23810 AT2G31180 AT5G06860 AT5G11250 AT4G09570 AT5G22570 AT5G36930 AT3G47640 AT1G19250 AT3G56980…
GO:0009694	P	jasmonic acid metabolic process	10	1564	34	37767	8e-07	1.8e-05	AT1G55020 AT5G07010 AT5G42650 AT2G06050 AT3G45140 AT3G25760 AT4G16760 AT3G25780 AT1G17420 AT1G72520
GO:0009813	P	flavonoid biosynthetic process	14	1564	69	37767	8.2e-07	1.9e-05	AT4G22880 AT2G39175 AT1G32640 AT1G75040 AT1G56650 AT5G46845 AT1G66370 AT5G13930 AT2G36790 AT4G17788 AT3G19010 AT5G24530 AT3G55120 AT5G42800
GO:0009682	P	induced systemic resistance	6	1564	10	37767	9.3e-07	2.1e-05	AT5G47220 AT5G40990 AT2G43790 AT3G56400 AT1G56160 AT3G15210
GO:0046483	P	heterocycle metabolic process	43	1564	460	37767	1.1e-06	2.4e-05	AT4G31500 AT5G26030 AT3G63380 AT2G38470 AT5G05730 AT2G43790 AT3G06300 AT3G54640 AT1G73500 AT5G44070 AT2G30770 AT3G45640 AT1G69370 AT1G59870 AT5G57890 AT5G17990 AT2G04400 AT1G19670 AT3G25610 AT3G26830 AT2G43820 AT4G11150 AT5G38530 AT3G28480 AT1G09940 AT5G57220 AT2G36790 AT5G43910 AT3G30775 AT4G39950 AT3G14990 AT4G22920 AT3G17810 AT5G46180 AT4G29740 AT2G18950 AT1G05560 AT2G31390 AT2G44490 AT5G38710…
GO:0016998	P	cell wall macromolecule catabolic process	9	1564	28	37767	1.2e-06	2.7e-05	AT4G01700 AT2G17120 AT2G23770 AT2G43570 AT5G62150 AT2G33580 AT3G47540 AT1G02360 AT2G43590
GO:0009695	P	jasmonic acid biosynthetic process	9	1564	29	37767	1.7e-06	3.8e-05	AT1G55020 AT5G42650 AT2G06050 AT3G45140 AT3G25760 AT4G16760 AT3G25780 AT1G17420 AT1G72520
GO:0044271	P	cellular nitrogen compound biosynthetic process	38	1564	394	37767	2e-06	4.4e-05	AT4G31500 AT5G26030 AT2G38470 AT5G05730 AT2G43790 AT3G44720 AT3G54640 AT1G73500 AT2G30770 AT3G45640 AT1G17745 AT1G69370 AT4G39980 AT5G53460 AT3G51430 AT4G35630 AT5G57890 AT3G53180 AT5G17990 AT2G04400 AT3G51440 AT3G26830 AT5G64300 AT5G38530 AT5G48180 AT5G22630 AT1G09940 AT3G30775 AT4G39950 AT3G14990 AT3G17810 AT5G46180 AT1G22410 AT3G51450 AT4G34710 AT5G38710 AT5G34930 AT4G27070
GO:0046283	P	anthocyanin metabolic process	9	1564	30	37767	2.4e-06	5.2e-05	AT4G22880 AT2G39175 AT1G75040 AT1G56650 AT5G46845 AT1G66370 AT5G13930 AT4G17788 AT5G42800
GO:0031537	P	regulation of anthocyanin metabolic process	7	1564	17	37767	2.9e-06	6.2e-05	AT2G39175 AT1G75040 AT1G56650 AT5G46845 AT1G66370 AT5G13930 AT4G17788
GO:0022904	P	respiratory electron transport chain	10	1564	39	37767	3.2e-06	6.9e-05	AT5G08530 AT5G40650 AT2G02050 AT2G18450 AT4G02580 AT5G18800 AT5G66760 AT3G52730 AT3G27380 AT4G32470
GO:0007166	P	cell surface receptor linked signaling pathway	22	1564	172	37767	3.3e-06	7e-05	AT2G02220 AT1G74360 AT5G46330 AT1G09970 AT3G45640 AT1G35710 AT3G02130 AT4G39270 AT4G30340 AT5G45840 AT3G02880 AT4G34390 AT5G41180 AT1G17750 AT2G31880 AT1G73080 AT2G20900 AT3G47570 AT3G28450 AT1G21250 AT5G20480 AT5G63410
GO:0009812	P	flavonoid metabolic process	14	1564	78	37767	3.8e-06	8.1e-05	AT4G22880 AT2G39175 AT1G32640 AT1G75040 AT1G56650 AT5G46845 AT1G66370 AT5G13930 AT2G36790 AT4G17788 AT3G19010 AT5G24530 AT3G55120 AT5G42800
GO:0051179	P	localization	123	1564	1922	37767	4.4e-06	9.2e-05	AT4G31500 AT5G46050 AT1G29330 AT4G21120 AT4G28390 AT2G38290 AT4G21680 AT5G61520 AT5G52670 AT4G37640 AT2G17500 AT1G30900 AT5G40780 AT4G11150 AT2G47000 AT4G36670 AT4G30600 AT3G60540 AT4G39950 AT4G20110 AT4G19030 AT2G02810 AT5G54860 AT3G52400 AT5G67330 AT1G64060 AT5G52760 AT1G18570 AT4G12470 AT3G14090 AT2G36950 AT5G61010 AT1G07000 AT3G13320 AT5G48490 AT1G05300 AT5G44070 AT4G17615 AT5G17020 AT5G20230…
GO:0032787	P	monocarboxylic acid metabolic process	38	1564	408	37767	4.6e-06	9.6e-05	AT4G31500 AT1G05560 AT5G07010 AT3G06300 AT2G47240 AT2G33380 AT4G20380 AT1G02400 AT1G17420 AT4G15440 AT5G45340 AT1G74710 AT5G36880 AT3G13930 AT5G42650 AT2G26560 AT2G06050 AT5G26920 AT4G16760 AT2G43820 AT3G28480 AT1G64400 AT5G03730 AT5G27520 AT4G34250 AT3G45140 AT1G28380 AT2G41010 AT4G39950 AT3G25780 AT4G39030 AT5G13320 AT2G18950 AT5G27600 AT1G55020 AT3G14440 AT3G25760 AT1G72520
GO:0000160	P	two-component signal transduction system (phosphorelay)	15	1564	92	37767	6e-06	0.00012	AT5G47220 AT3G23230 AT4G17490 AT5G03730 AT3G23240 AT5G47230 AT1G06160 AT1G73500 AT2G44840 AT1G64060 AT1G56160 AT4G20380 AT3G12500 AT3G15210 AT5G40990
GO:0009738	P	abscisic acid mediated signaling pathway	15	1564	94	37767	7.9e-06	0.00016	AT5G01550 AT1G18890 AT1G69270 AT2G17290 AT2G39175 AT4G09570 AT2G46680 AT5G01540 AT5G58670 AT5G46845 AT1G64060 AT4G17615 AT4G17788 AT3G45640 AT5G01560
GO:0016143	P	S-glycoside metabolic process	12	1564	62	37767	8.2e-06	0.00017	AT4G31500 AT5G48180 AT4G39940 AT3G44320 AT5G57220 AT5G44070 AT1G74100 AT1G18590 AT2G44490 AT1G18570 AT1G62570 AT1G59870
GO:0019757	P	glycosinolate metabolic process	12	1564	62	37767	8.2e-06	0.00017	AT4G31500 AT5G48180 AT4G39940 AT3G44320 AT5G57220 AT5G44070 AT1G74100 AT1G18590 AT2G44490 AT1G18570 AT1G62570 AT1G59870
GO:0019760	P	glucosinolate metabolic process	12	1564	62	37767	8.2e-06	0.00017	AT4G31500 AT5G48180 AT4G39940 AT3G44320 AT5G57220 AT5G44070 AT1G74100 AT1G18590 AT2G44490 AT1G18570 AT1G62570 AT1G59870
GO:0000302	P	response to reactive oxygen species	14	1564	85	37767	1.1e-05	0.00021	AT4G21830 AT3G17790 AT2G29500 AT3G12580 AT4G26070 AT1G16420 AT2G43790 AT1G56650 AT3G48090 AT5G05410 AT1G20630 AT1G61120 AT4G02380 AT4G20380
GO:0015980	P	energy derivation by oxidation of organic compounds	14	1564	85	37767	1.1e-05	0.00021	AT5G08530 AT5G40650 AT2G02050 AT2G44350 AT5G03290 AT2G18450 AT4G02580 AT5G18800 AT3G22370 AT5G66760 AT3G52730 AT3G27380 AT4G26910 AT4G32470
GO:0045333	P	cellular respiration	14	1564	85	37767	1.1e-05	0.00021	AT5G08530 AT5G40650 AT2G02050 AT2G44350 AT5G03290 AT2G18450 AT4G02580 AT5G18800 AT3G22370 AT5G66760 AT3G52730 AT3G27380 AT4G26910 AT4G32470
GO:0044036	P	cell wall macromolecule metabolic process	10	1564	45	37767	1.3e-05	0.00025	AT4G01700 AT2G17120 AT2G23770 AT2G43570 AT5G62150 AT5G33290 AT2G33580 AT3G47540 AT1G02360 AT2G43590
GO:0015691	P	cadmium ion transport	5	1564	9	37767	1.3e-05	0.00026	AT5G67330 AT2G23150 AT1G59870 AT2G04040 AT3G13320
GO:0033036	P	macromolecule localization	40	1564	462	37767	1.5e-05	0.00029	AT4G31500 AT5G59310 AT5G62600 AT3G24350 AT5G48490 AT5G46330 AT3G54640 AT2G42210 AT5G17020 AT1G59870 AT4G12120 AT4G12480 AT2G44490 AT1G30900 AT4G30600 AT1G76970 AT2G38540 AT3G22600 AT1G29330 AT5G57220 AT3G25610 AT3G60540 AT5G55450 AT5G54740 AT4G39950 AT4G22610 AT4G20110 AT1G21380 AT1G28380 AT5G44070 AT3G52400 AT5G64080 AT4G22470 AT4G12490 AT3G11820 AT4G12500 AT1G64060 AT1G18570 AT4G12470 AT4G39670
GO:0043455	P	regulation of secondary metabolic process	9	1564	40	37767	3.1e-05	0.0006	AT2G39175 AT1G32640 AT4G39940 AT1G56650 AT5G46845 AT1G75040 AT1G66370 AT5G13930 AT4G17788
GO:0048518	P	positive regulation of biological process	26	1564	259	37767	3.8e-05	0.00073	AT4G11280 AT1G32640 AT2G43790 AT5G47220 AT1G73500 AT3G63010 AT1G56160 AT2G23150 AT5G61900 AT5G40990 AT4G12720 AT1G21410 AT3G05360 AT4G39400 AT4G09570 AT3G56400 AT4G23810 AT3G08720 AT1G67810 AT3G15210 AT1G19250 AT3G25070 AT5G10380 AT5G67330 AT5G20480 AT5G24860
GO:0000165	P	MAPKKK cascade	5	1564	11	37767	4.6e-05	0.00087	AT4G26070 AT4G08500 AT4G29810 AT1G51660 AT3G45640
GO:0006576	P	cellular biogenic amine metabolic process	11	1564	62	37767	4.5e-05	0.00087	AT4G31500 AT5G05730 AT5G57890 AT5G17990 AT3G54640 AT2G04400 AT4G34710 AT4G39950 AT1G69370 AT4G27070 AT5G38530
GO:0046685	P	response to arsenic	5	1564	11	37767	4.6e-05	0.00087	AT5G44070 AT4G33540 AT4G13180 AT5G52640 AT4G19030
GO:0055114	P	oxidation reduction	22	1564	203	37767	4.6e-05	0.00087	AT5G40650 AT5G54500 AT5G24760 AT1G59950 AT2G18450 AT3G52730 AT4G32470 AT5G08530 AT5G66760 AT2G37770 AT4G00570 AT1G64710 AT4G39830 AT2G02050 AT4G17720 AT3G22370 AT5G18800 AT1G60730 AT4G02580 AT1G32350 AT1G22450 AT3G27380
GO:0009809	P	lignin biosynthetic process	9	1564	42	37767	4.7e-05	0.00088	AT1G33030 AT1G76470 AT4G36220 AT5G14700 AT4G34230 AT1G80820 AT1G67980 AT1G72680 AT1G09500
GO:0042401	P	cellular biogenic amine biosynthetic process	10	1564	52	37767	4.9e-05	0.0009	AT4G31500 AT5G05730 AT5G57890 AT5G17990 AT3G54640 AT2G04400 AT4G34710 AT1G69370 AT4G27070 AT5G38530
GO:0044106	P	cellular amine metabolic process	37	1564	438	37767	5e-05	0.00092	AT4G31500 AT4G11280 AT1G01480 AT5G05730 AT5G17990 AT4G39950 AT3G54640 AT1G73500 AT3G53180 AT4G20380 AT1G17745 AT1G69370 AT4G39980 AT5G53460 AT4G35630 AT5G57890 AT1G62380 AT1G08630 AT2G04400 AT2G43820 AT5G34930 AT1G05560 AT5G22630 AT1G05010 AT3G30775 AT3G44720 AT3G47340 AT5G46180 AT1G22410 AT4G27070 AT4G23600 AT1G17960 AT4G34710 AT5G38710 AT5G38530 AT2G19590 AT4G26200
GO:0009862	P	systemic acquired resistance, salicylic acid mediated signaling pathway	7	1564	25	37767	5.3e-05	0.00097	AT4G01370 AT3G52430 AT3G48090 AT4G16890 AT4G20380 AT3G56400 AT1G64280
GO:0009625	P	response to insect	6	1564	18	37767	6.1e-05	0.0011	AT3G52430 AT5G44420 AT3G28740 AT5G57220 AT4G16760 AT1G64280
GO:0051234	P	establishment of localization	113	1564	1851	37767	6.5e-05	0.0012	AT5G46050 AT4G21120 AT4G28390 AT2G38290 AT4G21680 AT5G61520 AT5G52670 AT4G37640 AT2G17500 AT1G30900 AT5G40780 AT4G11150 AT2G47000 AT4G36670 AT4G30600 AT3G60540 AT1G29330 AT4G20110 AT4G19030 AT2G02810 AT5G54860 AT3G52400 AT5G67330 AT5G52760 AT4G12470 AT3G14090 AT2G36950 AT5G61010 AT1G07000 AT3G13320 AT5G48490 AT1G05300 AT4G17615 AT5G17020 AT5G20230 AT1G53030 AT5G25050 AT5G52750 AT3G22600 AT2G04070…
GO:0044273	P	sulfur compound catabolic process	7	1564	26	37767	6.9e-05	0.0013	AT5G48180 AT4G39640 AT4G29210 AT3G44320 AT5G44070 AT2G44490 AT1G59870
GO:0030001	P	metal ion transport	23	1564	224	37767	7.2e-05	0.0013	AT2G36950 AT3G07600 AT3G63380 AT3G13320 AT1G30270 AT3G51860 AT4G17615 AT2G23150 AT1G59870 AT1G53030 AT5G52750 AT5G52670 AT2G29410 AT1G15520 AT5G20230 AT5G17450 AT5G47560 AT5G60800 AT1G55780 AT5G52740 AT5G67330 AT5G52760 AT2G04040
GO:0007167	P	enzyme linked receptor protein signaling pathway	17	1564	140	37767	7.8e-05	0.0014	AT3G28450 AT2G02220 AT1G74360 AT5G45840 AT1G35710 AT5G46330 AT3G02130 AT3G02880 AT5G41180 AT1G09970 AT1G17750 AT5G20480 AT2G31880 AT5G63410 AT4G39270 AT1G73080 AT3G47570
GO:0007169	P	transmembrane receptor protein tyrosine kinase signaling pathway	17	1564	140	37767	7.8e-05	0.0014	AT3G28450 AT2G02220 AT1G74360 AT5G45840 AT1G35710 AT5G46330 AT3G02130 AT3G02880 AT5G41180 AT1G09970 AT1G17750 AT5G20480 AT2G31880 AT5G63410 AT4G39270 AT1G73080 AT3G47570
GO:0009615	P	response to virus	10	1564	55	37767	8e-05	0.0014	AT1G80840 AT4G31800 AT5G06320 AT3G11650 AT5G02500 AT5G24590 AT3G12580 AT3G04720 AT2G26560 AT2G35980
GO:0006810	P	transport	112	1564	1846	37767	8.8e-05	0.0015	AT5G46050 AT4G21120 AT4G28390 AT2G38290 AT4G21680 AT5G61520 AT5G52670 AT4G37640 AT2G17500 AT1G30900 AT5G40780 AT4G11150 AT2G47000 AT4G36670 AT4G30600 AT3G60540 AT1G29330 AT4G20110 AT4G19030 AT2G02810 AT5G54860 AT3G52400 AT5G67330 AT5G52760 AT4G12470 AT3G14090 AT2G36950 AT5G61010 AT1G07000 AT3G13320 AT5G48490 AT1G05300 AT4G17615 AT5G17020 AT5G20230 AT1G53030 AT5G25050 AT5G52750 AT3G22600 AT2G04070…
GO:0044272	P	sulfur compound biosynthetic process	15	1564	115	37767	8.9e-05	0.0016	AT4G31500 AT2G38470 AT1G18570 AT4G39940 AT2G43790 AT4G39950 AT5G57220 AT2G30770 AT1G73500 AT1G74100 AT1G18590 AT3G45640 AT3G14990 AT1G62570 AT3G26830
GO:0051607	P	defense response to virus	7	1564	27	37767	9e-05	0.0016	AT1G80840 AT4G31800 AT5G06320 AT3G11650 AT5G24590 AT2G26560 AT2G35980
GO:0016137	P	glycoside metabolic process	14	1564	104	37767	0.00011	0.0019	AT4G31500 AT5G48180 AT3G44320 AT4G39940 AT1G35910 AT5G20830 AT5G57220 AT5G44070 AT1G74100 AT1G18590 AT2G44490 AT1G18570 AT1G62570 AT1G59870
GO:0009692	P	ethylene metabolic process	7	1564	28	37767	0.00012	0.002	AT4G11280 AT1G01480 AT1G62380 AT1G05010 AT1G73500 AT2G19590 AT4G26200
GO:0009693	P	ethylene biosynthetic process	7	1564	28	37767	0.00012	0.002	AT4G11280 AT1G01480 AT1G62380 AT1G05010 AT1G73500 AT2G19590 AT4G26200
GO:0010193	P	response to ozone	8	1564	37	37767	0.00012	0.002	AT5G55120 AT5G42380 AT5G27600 AT2G06050 AT4G12720 AT4G11170 AT3G02840 AT1G15520
GO:0008652	P	cellular amino acid biosynthetic process	21	1564	202	37767	0.00012	0.002	AT4G31500 AT5G05730 AT4G35630 AT5G57890 AT5G22630 AT4G27070 AT5G34930 AT5G17990 AT3G44720 AT3G54640 AT3G30775 AT2G04400 AT3G53180 AT1G22410 AT5G38710 AT1G69370 AT1G17745 AT5G38530 AT4G39980 AT5G53460 AT5G46180
GO:0006119	P	oxidative phosphorylation	11	1564	69	37767	0.00012	0.0021	AT5G08530 AT5G40650 AT2G02050 AT2G18450 AT4G02580 AT5G18800 AT5G66760 AT3G52730 AT3G27380 AT4G32470 AT4G11150
GO:0006811	P	ion transport	35	1564	427	37767	0.00014	0.0023	AT2G36950 AT3G07600 AT3G63380 AT2G17290 AT3G13320 AT1G30270 AT4G21120 AT1G05300 AT3G51860 AT4G17615 AT2G23150 AT2G38290 AT1G59870 AT1G53030 AT5G52750 AT5G52670 AT5G17860 AT1G78900 AT2G29410 AT1G15520 AT1G32450 AT5G20230 AT5G17450 AT5G47560 AT5G60800 AT1G64170 AT1G55780 AT4G19030 AT5G50200 AT5G52740 AT4G11150 AT5G67330 AT4G23700 AT5G52760 AT2G04040
GO:0010224	P	response to UV-B	9	1564	48	37767	0.00014	0.0023	AT4G39400 AT5G52250 AT4G36220 AT5G13930 AT3G55120 AT1G75040 AT5G05410 AT3G17609 AT5G59820
GO:0009624	P	response to nematode	11	1564	70	37767	0.00014	0.0024	AT4G32650 AT1G58340 AT2G38290 AT5G67330 AT3G51860 AT5G13740 AT3G17700 AT2G47800 AT2G39350 AT4G39030 AT1G61800
GO:0009408	P	response to heat	18	1564	161	37767	0.00014	0.0024	AT4G17250 AT5G45710 AT3G12580 AT2G38470 AT5G59820 AT3G61190 AT5G02500 AT2G29500 AT1G09090 AT5G47910 AT5G05410 AT5G52640 AT3G08720 AT1G64280 AT5G02490 AT4G36990 AT3G46230 AT1G09080
GO:0006520	P	cellular amino acid metabolic process	35	1564	430	37767	0.00016	0.0026	AT4G31500 AT4G11280 AT1G01480 AT5G05730 AT5G17990 AT4G39950 AT3G54640 AT1G73500 AT3G53180 AT1G17745 AT1G69370 AT4G39980 AT5G53460 AT4G35630 AT5G57890 AT1G62380 AT1G08630 AT2G04400 AT2G43820 AT5G34930 AT1G05560 AT5G22630 AT1G05010 AT3G30775 AT3G44720 AT3G47340 AT5G46180 AT1G22410 AT1G17960 AT4G23600 AT5G38530 AT5G38710 AT4G27070 AT2G19590 AT4G26200
GO:0009411	P	response to UV	12	1564	83	37767	0.00016	0.0027	AT4G39400 AT5G52250 AT3G21240 AT4G36220 AT1G16420 AT5G13930 AT3G55120 AT1G75040 AT1G51680 AT5G05410 AT3G17609 AT5G59820
GO:0043449	P	cellular alkene metabolic process	7	1564	30	37767	0.00019	0.003	AT4G11280 AT1G01480 AT1G62380 AT1G05010 AT1G73500 AT2G19590 AT4G26200
GO:0043450	P	alkene biosynthetic process	7	1564	30	37767	0.00019	0.003	AT4G11280 AT1G01480 AT1G62380 AT1G05010 AT1G73500 AT2G19590 AT4G26200
GO:0009308	P	amine metabolic process	40	1564	521	37767	0.0002	0.0032	AT4G31500 AT4G11280 AT1G01480 AT5G05730 AT5G17990 AT3G06300 AT3G54640 AT1G73500 AT3G53180 AT4G20380 AT4G39950 AT1G69370 AT4G39980 AT1G17745 AT4G35630 AT5G57890 AT1G62380 AT1G08630 AT2G04400 AT2G43820 AT5G53460 AT5G34930 AT3G28480 AT5G22630 AT1G05010 AT3G30775 AT1G22410 AT3G44720 AT3G47340 AT5G46180 AT4G29740 AT1G05560 AT4G27070 AT4G23600 AT1G17960 AT4G34710 AT5G38710 AT5G38530 AT2G19590 AT4G26200
GO:0006812	P	cation transport	30	1564	357	37767	0.00026	0.0041	AT2G36950 AT3G07600 AT3G63380 AT3G13320 AT1G30270 AT1G05300 AT3G51860 AT4G17615 AT2G23150 AT2G38290 AT1G59870 AT1G53030 AT5G52750 AT5G52670 AT5G17860 AT1G78900 AT2G29410 AT1G15520 AT5G20230 AT5G17450 AT5G47560 AT5G60800 AT1G64170 AT1G55780 AT5G52740 AT4G11150 AT5G67330 AT4G23700 AT5G52760 AT2G04040
GO:0009309	P	amine biosynthetic process	22	1564	229	37767	0.00026	0.0042	AT4G31500 AT5G05730 AT5G17990 AT3G54640 AT1G17745 AT1G69370 AT4G39980 AT5G53460 AT4G35630 AT5G57890 AT3G53180 AT2G04400 AT5G34930 AT5G22630 AT3G30775 AT3G44720 AT5G46180 AT1G22410 AT4G34710 AT5G38710 AT5G38530 AT4G27070
GO:0044262	P	cellular carbohydrate metabolic process	33	1564	417	37767	0.00039	0.0062	AT4G31500 AT1G66980 AT4G39940 AT5G20830 AT5G58330 AT3G44320 AT5G44070 AT5G43910 AT1G59870 AT5G33290 AT5G57500 AT1G30620 AT4G26270 AT3G23730 AT1G62570 AT5G40760 AT5G48180 AT3G55410 AT1G66970 AT1G30000 AT5G57220 AT1G11545 AT1G18590 AT5G11670 AT1G05570 AT1G35910 AT4G25900 AT2G31390 AT4G20460 AT1G74100 AT2G44490 AT1G18570 AT5G62620
GO:0010941	P	regulation of cell death	8	1564	44	37767	0.00041	0.0064	AT5G61900 AT4G11280 AT3G52400 AT5G10380 AT3G11820 AT5G47910 AT4G20380 AT1G64060
GO:0048878	P	chemical homeostasis	15	1564	136	37767	0.00057	0.0089	AT4G39400 AT3G17790 AT2G29120 AT1G21270 AT5G47560 AT2G23170 AT5G67330 AT3G51860 AT5G48410 AT5G48400 AT4G27260 AT5G13740 AT2G29110 AT2G23150 AT4G16370
GO:0048585	P	negative regulation of response to stimulus	11	1564	82	37767	0.00058	0.0091	AT3G52430 AT1G74710 AT5G03730 AT3G52400 AT1G11310 AT3G11820 AT3G61190 AT1G64280 AT4G39030 AT3G15210 AT1G59870
GO:0042545	P	cell wall modification	14	1564	123	37767	0.00062	0.0097	AT4G31500 AT5G57220 AT2G26440 AT2G47550 AT5G46330 AT3G54640 AT2G45220 AT5G44070 AT2G44490 AT4G39950 AT3G43270 AT1G18570 AT1G20190 AT1G59870
GO:0009696	P	salicylic acid metabolic process	5	1564	18	37767	0.00067	0.01	AT2G41010 AT1G28380 AT1G74710 AT4G39030 AT5G26920
GO:0009861	P	jasmonic acid and ethylene-dependent systemic resistance	5	1564	19	37767	0.00088	0.013	AT4G01370 AT5G44420 AT3G12500 AT1G06160 AT1G74100
GO:0060548	P	negative regulation of cell death	5	1564	19	37767	0.00088	0.013	AT5G61900 AT3G52400 AT3G11820 AT5G47910 AT1G64060
GO:0016145	P	S-glycoside catabolic process	5	1564	19	37767	0.00088	0.013	AT5G44070 AT3G44320 AT2G44490 AT5G48180 AT1G59870
GO:0007243	P	protein kinase cascade	5	1564	19	37767	0.00088	0.013	AT4G26070 AT4G08500 AT4G29810 AT1G51660 AT3G45640
GO:0019759	P	glycosinolate catabolic process	5	1564	19	37767	0.00088	0.013	AT5G44070 AT3G44320 AT2G44490 AT5G48180 AT1G59870
GO:0019762	P	glucosinolate catabolic process	5	1564	19	37767	0.00088	0.013	AT5G44070 AT3G44320 AT2G44490 AT5G48180 AT1G59870
GO:0051252	P	regulation of RNA metabolic process	63	1564	996	37767	0.0009	0.013	AT5G49520 AT1G64380 AT3G23230 AT1G80840 AT2G38470 AT1G32640 AT5G47220 AT2G31180 AT1G06160 AT1G42990 AT2G44840 AT4G23550 AT2G40750 AT1G56160 AT4G17500 AT5G46350 AT2G33710 AT5G13330 AT5G56260 AT4G22070 AT1G22810 AT2G40740 AT4G39780 AT1G56650 AT1G74650 AT3G23240 AT1G06180 AT3G23250 AT4G31550 AT5G47230 AT2G46400 AT1G62300 AT2G30250 AT2G23320 AT1G44830 AT2G35160 AT2G46680 AT5G22570 AT4G01250 AT2G16720…
GO:0006904	P	vesicle docking during exocytosis	6	1564	29	37767	0.0011	0.016	AT5G61010 AT1G07000 AT3G55150 AT3G29400 AT2G39380 AT3G14090
GO:0022406	P	membrane docking	6	1564	29	37767	0.0011	0.016	AT5G61010 AT1G07000 AT3G55150 AT3G29400 AT2G39380 AT3G14090
GO:0048278	P	vesicle docking	6	1564	29	37767	0.0011	0.016	AT5G61010 AT1G07000 AT3G55150 AT3G29400 AT2G39380 AT3G14090
GO:0016139	P	glycoside catabolic process	5	1564	20	37767	0.0011	0.017	AT5G44070 AT3G44320 AT2G44490 AT5G48180 AT1G59870
GO:0006355	P	regulation of transcription, DNA-dependent	62	1564	987	37767	0.0011	0.017	AT5G49520 AT1G64380 AT3G23230 AT1G80840 AT2G38470 AT1G32640 AT5G47220 AT2G31180 AT1G06160 AT1G42990 AT2G44840 AT4G23550 AT2G40750 AT1G56160 AT4G17500 AT5G46350 AT2G33710 AT5G13330 AT4G22070 AT1G22810 AT2G40740 AT4G39780 AT1G56650 AT1G74650 AT3G23240 AT1G06180 AT3G23250 AT4G31550 AT5G47230 AT2G46400 AT1G62300 AT2G30250 AT2G23320 AT1G44830 AT2G35160 AT2G46680 AT5G22570 AT4G01250 AT2G16720 AT5G51190…
GO:0043067	P	regulation of programmed cell death	7	1564	40	37767	0.0012	0.017	AT4G11280 AT3G52400 AT5G10380 AT3G11820 AT5G47910 AT4G20380 AT1G64060
GO:0044238	P	primary metabolic process	439	1564	8995	37767	0.0012	0.017	AT1G61580 AT5G61560 AT3G44320 AT1G73500 AT1G28390 AT4G23550 AT1G56160 AT1G67470 AT3G59350 AT1G22810 AT1G08630 AT1G30620 AT5G15730 AT5G55170 AT5G34930 AT4G04500 AT1G05010 AT2G19130 AT4G15100 AT3G13650 AT4G23150 AT1G51780 AT1G66370 AT5G63410 AT1G09500 AT4G11280 AT5G22060 AT1G02400 AT5G46350 AT2G33710 AT3G55120 AT1G67980 AT4G29690 AT3G62600 AT3G55430 AT2G19590 AT3G28450 AT2G13790 AT5G38990 AT5G24210…
GO:0006972	P	hyperosmotic response	9	1564	64	37767	0.0013	0.018	AT4G01370 AT5G46050 AT5G59820 AT5G49480 AT4G23600 AT3G14440 AT5G67450 AT5G43170 AT5G46180
GO:0009269	P	response to desiccation	6	1564	30	37767	0.0013	0.018	AT1G32640 AT1G54100 AT2G46140 AT2G33380 AT1G48130 AT3G25760
GO:0016144	P	S-glycoside biosynthetic process	7	1564	41	37767	0.0014	0.019	AT4G31500 AT4G39940 AT5G57220 AT1G74100 AT1G18590 AT1G18570 AT1G62570
GO:0019758	P	glycosinolate biosynthetic process	7	1564	41	37767	0.0014	0.019	AT4G31500 AT4G39940 AT5G57220 AT1G74100 AT1G18590 AT1G18570 AT1G62570
GO:0019761	P	glucosinolate biosynthetic process	7	1564	41	37767	0.0014	0.019	AT4G31500 AT4G39940 AT5G57220 AT1G74100 AT1G18590 AT1G18570 AT1G62570
GO:0042440	P	pigment metabolic process	14	1564	134	37767	0.0014	0.02	AT5G26030 AT2G39175 AT4G22880 AT1G75040 AT1G09940 AT1G56650 AT5G46845 AT1G66370 AT5G13930 AT2G36790 AT4G17788 AT1G19670 AT4G22920 AT5G42800
GO:0042542	P	response to hydrogen peroxide	8	1564	53	37767	0.0015	0.021	AT3G17790 AT2G29500 AT3G12580 AT4G26070 AT1G16420 AT2G43790 AT5G05410 AT1G20630
GO:0006800	P	oxygen and reactive oxygen species metabolic process	9	1564	66	37767	0.0016	0.022	AT3G52430 AT3G49120 AT5G67330 AT1G56650 AT3G48090 AT5G47910 AT4G20380 AT1G64060 AT2G23150
GO:0006875	P	cellular metal ion homeostasis	8	1564	54	37767	0.0017	0.023	AT2G29120 AT5G67330 AT3G51860 AT5G48410 AT5G48400 AT2G29110 AT2G23150 AT4G16370
GO:0055065	P	metal ion homeostasis	8	1564	54	37767	0.0017	0.023	AT2G29120 AT5G67330 AT3G51860 AT5G48410 AT5G48400 AT2G29110 AT2G23150 AT4G16370
GO:0042538	P	hyperosmotic salinity response	8	1564	54	37767	0.0017	0.023	AT5G46050 AT5G59820 AT5G49480 AT4G23600 AT3G14440 AT5G67450 AT5G43170 AT5G46180
GO:0006887	P	exocytosis	6	1564	32	37767	0.0018	0.025	AT5G61010 AT1G07000 AT3G55150 AT3G29400 AT2G39380 AT3G14090
GO:0008037	P	cell recognition	6	1564	32	37767	0.0018	0.025	AT1G11330 AT1G61610 AT1G61370 AT4G27300 AT2G19130 AT1G61360
GO:0048544	P	recognition of pollen	6	1564	32	37767	0.0018	0.025	AT1G11330 AT1G61610 AT1G61370 AT4G27300 AT2G19130 AT1G61360
GO:0015674	P	di-, tri-valent inorganic cation transport	7	1564	43	37767	0.0018	0.025	AT3G63380 AT5G20230 AT3G13320 AT5G67330 AT2G23150 AT2G04040 AT1G59870
GO:0042592	P	homeostatic process	19	1564	216	37767	0.0019	0.025	AT5G61900 AT4G39400 AT3G17790 AT5G18600 AT2G29120 AT3G57070 AT1G21270 AT5G47560 AT2G23170 AT5G67330 AT3G51860 AT5G48410 AT5G48400 AT4G27260 AT5G13740 AT2G29110 AT2G23150 AT4G16370 AT3G61190
GO:0018130	P	heterocycle biosynthetic process	13	1564	123	37767	0.0019	0.025	AT4G31500 AT5G26030 AT5G57890 AT4G27070 AT1G09940 AT3G54640 AT2G04400 AT1G69370 AT3G14990 AT5G38530 AT5G05730 AT5G17990 AT5G46180
GO:0006633	P	fatty acid biosynthetic process	14	1564	140	37767	0.0022	0.029	AT1G55020 AT4G34250 AT2G18950 AT1G64400 AT5G42650 AT2G06050 AT2G47240 AT3G45140 AT3G25760 AT4G16760 AT3G25780 AT1G17420 AT2G26560 AT1G72520
GO:0009084	P	glutamine family amino acid biosynthetic process	5	1564	23	37767	0.0022	0.029	AT3G53180 AT5G53460 AT5G38710 AT3G30775 AT5G46180
GO:0055082	P	cellular chemical homeostasis	11	1564	97	37767	0.0023	0.031	AT2G29120 AT3G17790 AT1G21270 AT5G47560 AT5G67330 AT3G51860 AT5G48410 AT5G48400 AT2G29110 AT2G23150 AT4G16370
GO:0051187	P	cofactor catabolic process	7	1564	45	37767	0.0024	0.032	AT2G44350 AT5G03290 AT4G29210 AT4G39640 AT1G19670 AT4G22920 AT4G26910
GO:0046148	P	pigment biosynthetic process	12	1564	112	37767	0.0025	0.032	AT5G26030 AT2G39175 AT4G22880 AT1G75040 AT1G09940 AT1G56650 AT5G46845 AT1G66370 AT5G13930 AT2G36790 AT4G17788 AT5G42800
GO:0001666	P	response to hypoxia	5	1564	24	37767	0.0027	0.035	AT3G52430 AT3G48090 AT5G54960 AT4G20380 AT5G27760
GO:0080010	P	regulation of oxygen and reactive oxygen species metabolic process	5	1564	24	37767	0.0027	0.035	AT3G52430 AT3G48090 AT2G23150 AT4G20380 AT5G67330
GO:0070482	P	response to oxygen levels	5	1564	24	37767	0.0027	0.035	AT3G52430 AT3G48090 AT5G54960 AT4G20380 AT5G27760
GO:0009886	P	post-embryonic morphogenesis	6	1564	35	37767	0.0029	0.038	AT5G45710 AT2G35510 AT1G19270 AT1G74560 AT3G63010 AT3G07390
GO:0006631	P	fatty acid metabolic process	19	1564	225	37767	0.0029	0.038	AT1G55020 AT5G07010 AT4G34250 AT2G18950 AT1G64400 AT5G42650 AT5G27520 AT5G27600 AT2G06050 AT2G47240 AT2G33380 AT4G15440 AT3G45140 AT3G25760 AT4G16760 AT3G25780 AT1G17420 AT2G26560 AT1G72520
GO:0006855	P	multidrug transport	9	1564	73	37767	0.0032	0.041	AT2G47800 AT3G23550 AT1G71140 AT2G04050 AT1G61890 AT2G04070 AT1G66780 AT1G15520 AT1G59870
GO:0031667	P	response to nutrient levels	11	1564	101	37767	0.0032	0.041	AT2G14610 AT1G71040 AT5G27420 AT5G45380 AT3G44320 AT1G30270 AT3G49620 AT5G13080 AT1G55920 AT3G47340 AT1G20630
GO:0006869	P	lipid transport	15	1564	163	37767	0.0035	0.044	AT5G59310 AT2G38540 AT3G22600 AT5G48490 AT4G39670 AT5G64080 AT4G22470 AT4G12490 AT4G12480 AT4G12500 AT5G55450 AT5G54740 AT4G22610 AT3G25610 AT4G12470
GO:0009991	P	response to extracellular stimulus	12	1564	117	37767	0.0035	0.045	AT2G14610 AT1G71040 AT5G27420 AT5G45380 AT3G44320 AT1G30270 AT3G49620 AT5G13080 AT1G55920 AT4G02380 AT3G47340 AT1G20630
GO:0022900	P	electron transport chain	10	1564	88	37767	0.0036	0.045	AT5G08530 AT5G40650 AT2G02050 AT2G18450 AT4G02580 AT5G18800 AT5G66760 AT3G52730 AT3G27380 AT4G32470
GO:0006351	P	transcription, DNA-dependent	62	1564	1039	37767	0.0036	0.046	AT5G49520 AT1G64380 AT3G23230 AT1G80840 AT2G38470 AT1G32640 AT5G47220 AT2G31180 AT1G06160 AT1G42990 AT2G44840 AT4G23550 AT2G40750 AT1G56160 AT4G17500 AT5G46350 AT2G33710 AT5G13330 AT4G22070 AT1G22810 AT2G40740 AT4G39780 AT1G56650 AT1G74650 AT3G23240 AT1G06180 AT3G23250 AT4G31550 AT5G47230 AT2G46400 AT1G62300 AT2G30250 AT2G23320 AT1G44830 AT2G35160 AT2G46680 AT5G22570 AT4G01250 AT2G16720 AT5G51190…
GO:0032774	P	RNA biosynthetic process	62	1564	1040	37767	0.0037	0.046	AT5G49520 AT1G64380 AT3G23230 AT1G80840 AT2G38470 AT1G32640 AT5G47220 AT2G31180 AT1G06160 AT1G42990 AT2G44840 AT4G23550 AT2G40750 AT1G56160 AT4G17500 AT5G46350 AT2G33710 AT5G13330 AT4G22070 AT1G22810 AT2G40740 AT4G39780 AT1G56650 AT1G74650 AT3G23240 AT1G06180 AT3G23250 AT4G31550 AT5G47230 AT2G46400 AT1G62300 AT2G30250 AT2G23320 AT1G44830 AT2G35160 AT2G46680 AT5G22570 AT4G01250 AT2G16720 AT5G51190…
GO:0050801	P	ion homeostasis	11	1564	103	37767	0.0037	0.047	AT2G29120 AT3G17790 AT5G47560 AT5G67330 AT3G51860 AT5G48410 AT5G48400 AT5G13740 AT2G29110 AT2G23150 AT4G16370
GO:0055080	P	cation homeostasis	10	1564	90	37767	0.0042	0.052	AT2G29120 AT5G47560 AT5G67330 AT3G51860 AT5G48410 AT5G48400 AT5G13740 AT2G29110 AT2G23150 AT4G16370
GO:0015893	P	drug transport	9	1564	76	37767	0.0042	0.052	AT2G47800 AT3G23550 AT1G71140 AT2G04050 AT1G61890 AT2G04070 AT1G66780 AT1G15520 AT1G59870
GO:0009850	P	auxin metabolic process	7	1564	50	37767	0.0044	0.054	AT4G31500 AT1G44350 AT3G02875 AT5G05730 AT5G27520 AT5G20960 AT4G39950
GO:0042493	P	response to drug	9	1564	77	37767	0.0046	0.057	AT2G47800 AT3G23550 AT1G71140 AT2G04050 AT1G61890 AT2G04070 AT1G66780 AT1G15520 AT1G59870
GO:0009109	P	coenzyme catabolic process	5	1564	27	37767	0.0046	0.057	AT5G03290 AT4G29210 AT4G26910 AT4G39640 AT2G44350
GO:0009875	P	pollen-pistil interaction	6	1564	39	37767	0.0051	0.063	AT1G11330 AT1G61610 AT1G61370 AT4G27300 AT2G19130 AT1G61360
GO:0016138	P	glycoside biosynthetic process	9	1564	79	37767	0.0055	0.066	AT4G31500 AT4G39940 AT1G35910 AT5G20830 AT5G57220 AT1G74100 AT1G18590 AT1G18570 AT1G62570
GO:0051606	P	detection of stimulus	7	1564	52	37767	0.0055	0.067	AT5G13320 AT4G39400 AT3G21630 AT4G26090 AT1G62380 AT5G46330 AT5G20480
GO:0007568	P	aging	11	1564	110	37767	0.0062	0.074	AT3G52430 AT1G69490 AT3G49620 AT5G14930 AT5G66170 AT4G30270 AT5G60360 AT5G11520 AT2G29350 AT2G35980 AT5G39610
GO:0019725	P	cellular homeostasis	15	1564	174	37767	0.0063	0.076	AT5G61900 AT2G29120 AT3G17790 AT5G18600 AT3G57070 AT1G21270 AT5G47560 AT5G67330 AT3G51860 AT5G48410 AT5G48400 AT3G61190 AT2G29110 AT2G23150 AT4G16370
GO:0009631	P	cold acclimation	5	1564	29	37767	0.0063	0.076	AT5G66400 AT5G59820 AT3G50970 AT5G67590 AT4G29810
GO:0006873	P	cellular ion homeostasis	10	1564	96	37767	0.0066	0.079	AT2G29120 AT3G17790 AT5G47560 AT5G67330 AT3G51860 AT5G48410 AT5G48400 AT2G29110 AT2G23150 AT4G16370
GO:0046903	P	secretion	7	1564	54	37767	0.0068	0.08	AT5G61010 AT1G07000 AT3G55150 AT3G29400 AT2G39380 AT4G12120 AT3G14090
GO:0032940	P	secretion by cell	7	1564	54	37767	0.0068	0.08	AT5G61010 AT1G07000 AT3G55150 AT3G29400 AT2G39380 AT4G12120 AT3G14090
GO:0010150	P	leaf senescence	5	1564	30	37767	0.0073	0.087	AT3G52430 AT1G69490 AT5G11520 AT2G35980 AT5G39610
GO:0046395	P	carboxylic acid catabolic process	10	1564	98	37767	0.0076	0.089	AT5G38710 AT5G27520 AT3G47340 AT1G08630 AT3G30775 AT4G16760 AT1G02400 AT4G39950 AT5G45340 AT5G46180
GO:0016054	P	organic acid catabolic process	10	1564	98	37767	0.0076	0.089	AT5G38710 AT5G27520 AT3G47340 AT1G08630 AT3G30775 AT4G16760 AT1G02400 AT4G39950 AT5G45340 AT5G46180
GO:0030003	P	cellular cation homeostasis	9	1564	84	37767	0.0081	0.095	AT2G29120 AT5G47560 AT5G67330 AT3G51860 AT5G48410 AT5G48400 AT2G29110 AT2G23150 AT4G16370
GO:0006555	P	methionine metabolic process	7	1564	56	37767	0.0083	0.096	AT4G11280 AT1G01480 AT1G62380 AT1G05010 AT1G73500 AT2G19590 AT4G26200
GO:0010260	P	organ senescence	5	1564	31	37767	0.0085	0.097	AT3G52430 AT1G69490 AT5G11520 AT2G35980 AT5G39610
GO:0006874	P	cellular calcium ion homeostasis	5	1564	31	37767	0.0085	0.097	AT2G29110 AT2G29120 AT3G51860 AT5G48410 AT5G48400
GO:0055074	P	calcium ion homeostasis	5	1564	31	37767	0.0085	0.097	AT2G29110 AT2G29120 AT3G51860 AT5G48410 AT5G48400
GO:0065008	P	regulation of biological quality	41	1564	665	37767	0.009	0.1	AT4G31500 AT1G44350 AT3G17790 AT5G18600 AT5G05730 AT1G29330 AT5G13740 AT2G23170 AT3G51860 AT4G27260 AT3G49120 AT2G29110 AT5G17020 AT4G16370 AT2G23150 AT5G61900 AT2G06850 AT1G76520 AT2G17500 AT5G48400 AT2G03760 AT5G13930 AT1G20190 AT2G47000 AT4G39400 AT3G02875 AT5G27520 AT1G70140 AT3G57070 AT5G47560 AT3G61190 AT4G39950 AT5G20960 AT2G29120 AT1G69490 AT4G29740 AT4G33430 AT5G67330 AT1G21270 AT5G48410…
GO:0031323	P	regulation of cellular metabolic process	107	1564	2036	37767	0.01	0.12	AT5G49520 AT1G64380 AT1G80840 AT1G51700 AT2G20900 AT3G21150 AT4G37790 AT3G46600 AT4G23550 AT1G56160 AT5G46350 AT2G37430 AT3G53600 AT1G22810 AT2G40740 AT3G48090 AT4G17788 AT5G22650 AT4G23810 AT2G31180 AT5G22570 AT3G47640 AT3G56980 AT3G17609 AT1G73500 AT5G46910 AT4G17230 AT2G24570 AT5G67330 AT1G66370 AT3G50260 AT1G18570 AT5G15130 AT1G77250 AT4G39940 AT2G23150 AT2G33710 AT1G75040 AT1G06160 AT5G66730…
GO:0009744	P	response to sucrose stimulus	6	1564	47	37767	0.013	0.14	AT5G03730 AT1G74670 AT4G34390 AT1G56650 AT3G47340 AT1G61800
GO:0009063	P	cellular amino acid catabolic process	6	1564	47	37767	0.013	0.14	AT5G38710 AT1G08630 AT3G30775 AT4G39950 AT3G47340 AT5G46180
GO:0000041	P	transition metal ion transport	7	1564	61	37767	0.013	0.15	AT1G53030 AT3G13320 AT5G67330 AT2G29410 AT2G23150 AT2G04040 AT1G59870
GO:0034285	P	response to disaccharide stimulus	6	1564	49	37767	0.015	0.17	AT5G03730 AT1G74670 AT4G34390 AT1G56650 AT3G47340 AT1G61800
GO:0009310	P	amine catabolic process	6	1564	49	37767	0.015	0.17	AT5G38710 AT1G08630 AT3G30775 AT4G39950 AT3G47340 AT5G46180
GO:0009733	P	response to auxin stimulus	24	1564	360	37767	0.017	0.19	AT4G11280 AT2G47000 AT3G09600 AT5G54500 AT2G23170 AT2G28085 AT3G09870 AT5G50760 AT2G39175 AT4G27260 AT5G46845 AT2G06850 AT4G17788 AT2G31180 AT5G45710 AT2G26740 AT3G12830 AT5G13320 AT3G07390 AT5G54490 AT4G16890 AT4G37610 AT3G23250 AT1G18570
GO:0055066	P	di-, tri-valent inorganic cation homeostasis	7	1564	65	37767	0.018	0.2	AT2G29120 AT5G67330 AT3G51860 AT5G48410 AT5G48400 AT5G13740 AT2G29110
GO:0048522	P	positive regulation of cellular process	13	1564	163	37767	0.019	0.21	AT4G11280 AT1G32640 AT5G47220 AT4G09570 AT4G23810 AT5G10380 AT1G73500 AT5G67330 AT3G63010 AT1G21410 AT3G08720 AT1G67810 AT2G23150
GO:0046700	P	heterocycle catabolic process	5	1564	38	37767	0.02	0.22	AT1G19670 AT4G22920 AT4G39950 AT3G30775 AT5G38710
GO:0031669	P	cellular response to nutrient levels	8	1564	82	37767	0.021	0.23	AT1G71040 AT5G27420 AT5G45380 AT3G44320 AT3G49620 AT1G55920 AT3G47340 AT1G20630
GO:0031668	P	cellular response to extracellular stimulus	9	1564	98	37767	0.021	0.23	AT1G71040 AT5G27420 AT5G45380 AT3G44320 AT3G49620 AT1G55920 AT4G02380 AT3G47340 AT1G20630
GO:0044248	P	cellular catabolic process	43	1564	746	37767	0.021	0.24	AT2G29470 AT2G44350 AT3G44320 AT5G58330 AT5G44070 AT1G10370 AT1G02400 AT5G45340 AT1G59870 AT1G08630 AT1G27130 AT4G16760 AT4G26270 AT4G29210 AT1G17170 AT1G19670 AT5G40760 AT1G02930 AT5G48180 AT3G55410 AT1G21410 AT4G39640 AT5G27520 AT2G02390 AT3G30775 AT1G69930 AT1G17190 AT4G39950 AT4G22920 AT4G26910 AT3G47340 AT1G74590 AT5G46180 AT5G03290 AT2G29460 AT2G29420 AT2G44490 AT3G09270 AT2G29440 AT5G38710…
GO:0015833	P	peptide transport	7	1564	68	37767	0.023	0.25	AT5G46050 AT1G48370 AT3G53960 AT4G21680 AT1G62200 AT4G16370 AT1G32450
GO:0006857	P	oligopeptide transport	7	1564	68	37767	0.023	0.25	AT5G46050 AT1G48370 AT3G53960 AT4G21680 AT1G62200 AT4G16370 AT1G32450
GO:0010817	P	regulation of hormone levels	13	1564	168	37767	0.024	0.26	AT4G31500 AT1G44350 AT2G47000 AT4G29740 AT3G02875 AT5G05730 AT5G27520 AT2G03760 AT2G17500 AT1G76520 AT5G13930 AT5G20960 AT4G39950
GO:0010149	P	senescence	5	1564	40	37767	0.024	0.26	AT3G52430 AT1G69490 AT5G11520 AT2G35980 AT5G39610
GO:0019321	P	pentose metabolic process	5	1564	41	37767	0.027	0.29	AT5G43910 AT5G11670 AT1G30620 AT5G40760 AT2G31390
GO:0032446	P	protein modification by small protein conjugation	11	1564	136	37767	0.027	0.29	AT5G67340 AT3G52450 AT5G61560 AT2G35930 AT4G24940 AT4G36550 AT1G76390 AT3G11840 AT1G29340 AT5G55170 AT3G18710
GO:0009416	P	response to light stimulus	35	1564	596	37767	0.028	0.29	AT4G31500 AT3G49120 AT5G59820 AT1G16420 AT1G02400 AT2G29110 AT3G55120 AT5G45340 AT2G37970 AT5G52250 AT2G29500 AT1G27730 AT4G36220 AT2G35510 AT2G30490 AT2G06850 AT5G48400 AT5G13930 AT4G39400 AT5G20230 AT1G22280 AT4G34250 AT1G66480 AT3G17609 AT3G47340 AT2G29120 AT3G12580 AT3G21240 AT1G51680 AT2G41100 AT1G75040 AT5G48410 AT5G05410 AT1G20630 AT1G48030
GO:0044267	P	cellular protein metabolic process	169	1564	3487	37767	0.028	0.3	AT1G61580 AT4G11470 AT5G61560 AT3G06300 AT1G70740 AT1G73500 AT1G28390 AT3G09830 AT1G67470 AT3G59350 AT2G17220 AT5G67340 AT5G57500 AT5G04870 AT4G24940 AT1G76390 AT5G25440 AT3G46930 AT5G06750 AT2G23200 AT5G58540 AT3G13310 AT5G65600 AT4G04500 AT5G45840 AT1G74330 AT4G09570 AT2G19130 AT5G47070 AT4G18250 AT3G55450 AT4G21400 AT1G11330 AT3G25070 AT1G61370 AT4G33920 AT4G27300 AT3G20410 AT4G23150 AT5G63410…
GO:0005975	P	carbohydrate metabolic process	48	1564	866	37767	0.029	0.31	AT4G31500 AT1G66980 AT4G18340 AT4G39940 AT5G20830 AT5G20950 AT5G58330 AT3G44320 AT5G44070 AT3G63010 AT5G43910 AT1G55850 AT1G59870 AT2G19440 AT5G33290 AT5G57500 AT1G21270 AT1G30620 AT4G26270 AT3G23730 AT1G62570 AT5G40760 AT5G48180 AT3G55410 AT1G66970 AT3G50760 AT1G30000 AT5G57220 AT3G55430 AT1G11545 AT4G24000 AT5G11670 AT1G62660 AT1G05570 AT2G27500 AT2G26600 AT5G14650 AT4G19810 AT1G35910 AT1G80160…
GO:0009064	P	glutamine family amino acid metabolic process	5	1564	42	37767	0.029	0.31	AT3G53180 AT5G53460 AT5G38710 AT3G30775 AT5G46180
GO:0009820	P	alkaloid metabolic process	6	1564	57	37767	0.03	0.32	AT3G51430 AT3G21070 AT3G51450 AT3G51440 AT5G11670 AT5G40760
GO:0006091	P	generation of precursor metabolites and energy	19	1564	285	37767	0.03	0.32	AT5G08530 AT5G40650 AT3G55410 AT2G02050 AT2G44350 AT5G03290 AT5G18800 AT2G18450 AT4G02580 AT5G58330 AT3G22370 AT5G66760 AT4G26270 AT3G52730 AT3G09490 AT3G27380 AT4G26910 AT4G32470 AT4G11150
GO:0009267	P	cellular response to starvation	7	1564	73	37767	0.032	0.33	AT1G71040 AT5G45380 AT3G44320 AT3G49620 AT1G55920 AT3G47340 AT1G20630
GO:0010118	P	stomatal movement	6	1564	58	37767	0.033	0.34	AT1G74710 AT2G17290 AT1G30270 AT1G64060 AT4G17615 AT2G47800
GO:0009642	P	response to light intensity	8	1564	90	37767	0.034	0.35	AT2G29500 AT3G12580 AT5G20230 AT5G59820 AT2G41100 AT2G06850 AT3G47340 AT1G27730
GO:0009066	P	aspartate family amino acid metabolic process	8	1564	90	37767	0.034	0.35	AT4G11280 AT1G01480 AT1G62380 AT1G08630 AT1G05010 AT1G73500 AT2G19590 AT4G26200
GO:0009889	P	regulation of biosynthetic process	95	1564	1881	37767	0.034	0.35	AT5G49520 AT1G64380 AT1G80840 AT1G51700 AT3G21150 AT4G37790 AT3G46600 AT4G23550 AT1G56160 AT5G46350 AT2G37430 AT3G53600 AT1G22810 AT2G40740 AT4G17788 AT5G22650 AT4G23810 AT2G31180 AT5G22570 AT3G47640 AT3G56980 AT3G17609 AT1G73500 AT5G46910 AT4G17230 AT2G24570 AT1G66370 AT3G50260 AT1G18570 AT5G15130 AT1G77250 AT4G39940 AT2G33710 AT1G75040 AT1G06160 AT5G66730 AT5G46845 AT4G39780 AT1G10585 AT3G44350…
GO:0031326	P	regulation of cellular biosynthetic process	95	1564	1881	37767	0.034	0.35	AT5G49520 AT1G64380 AT1G80840 AT1G51700 AT3G21150 AT4G37790 AT3G46600 AT4G23550 AT1G56160 AT5G46350 AT2G37430 AT3G53600 AT1G22810 AT2G40740 AT4G17788 AT5G22650 AT4G23810 AT2G31180 AT5G22570 AT3G47640 AT3G56980 AT3G17609 AT1G73500 AT5G46910 AT4G17230 AT2G24570 AT1G66370 AT3G50260 AT1G18570 AT5G15130 AT1G77250 AT4G39940 AT2G33710 AT1G75040 AT1G06160 AT5G66730 AT5G46845 AT4G39780 AT1G10585 AT3G44350…
GO:0019222	P	regulation of metabolic process	110	1564	2210	37767	0.034	0.35	AT5G49520 AT1G64380 AT3G13405 AT1G80840 AT1G51700 AT2G20900 AT3G21150 AT4G37790 AT3G46600 AT4G23550 AT1G56160 AT5G46350 AT2G37430 AT3G53600 AT1G22810 AT2G40740 AT3G48090 AT4G17788 AT5G22650 AT4G23810 AT2G31180 AT5G22570 AT3G47640 AT3G56980 AT3G17609 AT1G73500 AT5G46910 AT4G17230 AT2G24570 AT5G67330 AT1G66370 AT3G50260 AT1G18570 AT5G15130 AT1G77250 AT4G39940 AT2G23150 AT2G33710 AT1G75040 AT3G51375…
GO:0030005	P	cellular di-, tri-valent inorganic cation homeostasis	6	1564	59	37767	0.035	0.36	AT2G29120 AT5G67330 AT3G51860 AT5G48410 AT5G48400 AT2G29110
GO:0031325	P	positive regulation of cellular metabolic process	8	1564	91	37767	0.035	0.36	AT4G23810 AT1G32640 AT5G47220 AT1G73500 AT5G67330 AT3G08720 AT1G67810 AT2G23150
GO:0044275	P	cellular carbohydrate catabolic process	10	1564	125	37767	0.036	0.36	AT5G48180 AT3G55410 AT3G44320 AT5G58330 AT5G44070 AT2G44490 AT5G11670 AT4G26270 AT5G40760 AT1G59870
GO:0009893	P	positive regulation of metabolic process	8	1564	92	37767	0.037	0.38	AT4G23810 AT1G32640 AT5G47220 AT1G73500 AT5G67330 AT3G08720 AT1G67810 AT2G23150
GO:0042445	P	hormone metabolic process	9	1564	109	37767	0.038	0.38	AT4G31500 AT1G44350 AT4G29740 AT3G02875 AT5G05730 AT5G27520 AT4G39950 AT5G20960 AT2G03760
GO:0006629	P	lipid metabolic process	46	1564	841	37767	0.039	0.39	AT1G66980 AT5G07010 AT1G02400 AT4G15340 AT2G47240 AT2G33380 AT5G02100 AT3G62590 AT1G30370 AT1G29670 AT1G17420 AT5G45340 AT3G52430 AT4G34250 AT5G42650 AT5G14930 AT2G06050 AT5G24160 AT5G14700 AT4G15440 AT3G48090 AT1G61120 AT2G03760 AT5G55050 AT1G64400 AT5G03730 AT5G27520 AT5G03610 AT5G36150 AT3G45140 AT3G14440 AT2G30550 AT1G31550 AT4G16760 AT3G25780 AT1G76470 AT2G18950 AT5G57190 AT5G27600 AT5G24210…
GO:0009314	P	response to radiation	35	1564	613	37767	0.039	0.39	AT4G31500 AT3G49120 AT5G59820 AT1G16420 AT1G02400 AT2G29110 AT3G55120 AT5G45340 AT2G37970 AT5G52250 AT2G29500 AT1G27730 AT4G36220 AT2G35510 AT2G30490 AT2G06850 AT5G48400 AT5G13930 AT4G39400 AT5G20230 AT1G22280 AT4G34250 AT1G66480 AT3G17609 AT3G47340 AT2G29120 AT3G12580 AT3G21240 AT1G51680 AT2G41100 AT1G75040 AT5G48410 AT5G05410 AT1G20630 AT1G48030
GO:0016052	P	carbohydrate catabolic process	10	1564	128	37767	0.041	0.41	AT5G48180 AT3G55410 AT3G44320 AT5G58330 AT5G44070 AT2G44490 AT5G11670 AT4G26270 AT5G40760 AT1G59870
GO:0048527	P	lateral root development	6	1564	62	37767	0.043	0.43	AT5G05730 AT5G45710 AT2G35510 AT1G74560 AT3G07390 AT5G13080
GO:0080090	P	regulation of primary metabolic process	97	1564	1952	37767	0.045	0.45	AT5G49520 AT1G64380 AT1G80840 AT1G51700 AT3G21150 AT4G37790 AT3G46600 AT4G23550 AT1G56160 AT5G46350 AT2G37430 AT3G53600 AT1G22810 AT2G40740 AT4G17788 AT5G22650 AT4G23810 AT2G31180 AT5G22570 AT3G47640 AT3G56980 AT3G17609 AT1G73500 AT5G46910 AT4G17230 AT2G24570 AT1G66370 AT3G50260 AT1G18570 AT5G15130 AT1G77250 AT4G39940 AT2G33710 AT1G75040 AT1G06160 AT5G66730 AT5G46845 AT4G39780 AT1G10585 AT3G44350…
GO:0042594	P	response to starvation	7	1564	81	37767	0.051	0.51	AT1G71040 AT5G45380 AT3G44320 AT3G49620 AT1G55920 AT3G47340 AT1G20630
GO:0048528	P	post-embryonic root development	6	1564	67	37767	0.059	0.59	AT5G05730 AT5G45710 AT2G35510 AT1G74560 AT3G07390 AT5G13080
GO:0000096	P	sulfur amino acid metabolic process	7	1564	84	37767	0.06	0.59	AT4G11280 AT1G01480 AT1G62380 AT1G05010 AT1G73500 AT2G19590 AT4G26200
GO:0009853	P	photorespiration	5	1564	52	37767	0.064	0.63	AT2G27730 AT5G52840 AT3G18410 AT2G02050 AT1G49140
GO:0019538	P	protein metabolic process	187	1564	4009	37767	0.065	0.63	AT1G61580 AT4G11470 AT5G61560 AT3G06300 AT1G70740 AT1G73500 AT1G28390 AT3G09830 AT1G67470 AT3G59350 AT2G17220 AT5G67340 AT4G25110 AT5G57500 AT4G01610 AT5G04870 AT4G24940 AT5G10760 AT1G76390 AT5G25440 AT3G46930 AT5G06750 AT2G23200 AT5G58540 AT3G13310 AT5G65600 AT4G04500 AT5G45840 AT1G32940 AT1G74330 AT4G09570 AT2G19130 AT5G47070 AT4G18250 AT4G15100 AT3G55450 AT4G21400 AT1G11330 AT3G25070 AT1G61370…
GO:0016567	P	protein ubiquitination	9	1564	121	37767	0.065	0.64	AT3G11840 AT3G52450 AT5G61560 AT2G35930 AT1G29340 AT4G36550 AT1G76390 AT5G67340 AT3G18710
GO:0070647	P	protein modification by small protein conjugation or removal	11	1564	158	37767	0.066	0.64	AT5G67340 AT3G52450 AT5G61560 AT2G35930 AT4G24940 AT4G36550 AT1G76390 AT3G11840 AT1G29340 AT5G55170 AT3G18710
GO:0034637	P	cellular carbohydrate biosynthetic process	12	1564	177	37767	0.066	0.64	AT4G31500 AT4G39940 AT1G35910 AT5G20830 AT5G57220 AT1G18590 AT1G05570 AT1G74100 AT1G30620 AT5G33290 AT1G18570 AT1G62570
GO:0045449	P	regulation of transcription	88	1564	1802	37767	0.072	0.7	AT5G49520 AT1G64380 AT1G80840 AT1G51700 AT3G21150 AT4G37790 AT3G46600 AT4G23550 AT1G56160 AT5G46350 AT2G37430 AT3G53600 AT1G22810 AT2G40740 AT5G22650 AT4G23810 AT2G31180 AT5G22570 AT3G47640 AT3G56980 AT3G17609 AT1G73500 AT5G46910 AT4G17230 AT2G24570 AT1G66370 AT3G50260 AT1G18570 AT5G15130 AT1G77250 AT2G33710 AT1G06160 AT5G66730 AT4G39780 AT1G10585 AT3G44350 AT4G01250 AT1G68150 AT1G74080 AT1G43160…
GO:0006753	P	nucleoside phosphate metabolic process	12	1564	180	37767	0.073	0.7	AT3G63380 AT2G41880 AT4G29690 AT3G21070 AT3G17810 AT3G57550 AT5G11670 AT1G10700 AT4G29700 AT3G25610 AT5G40760 AT4G11150
GO:0009117	P	nucleotide metabolic process	12	1564	180	37767	0.073	0.7	AT3G63380 AT2G41880 AT4G29690 AT3G21070 AT3G17810 AT3G57550 AT5G11670 AT1G10700 AT4G29700 AT3G25610 AT5G40760 AT4G11150
GO:0051641	P	cellular localization	31	1564	569	37767	0.078	0.75	AT4G31500 AT5G61010 AT1G07000 AT5G62600 AT3G24350 AT4G24570 AT5G46330 AT3G54640 AT5G44070 AT5G17020 AT4G28390 AT1G59870 AT3G29400 AT4G12120 AT1G30900 AT4G30600 AT1G76970 AT5G27520 AT1G29330 AT5G57220 AT1G66480 AT4G39950 AT4G20110 AT1G21380 AT3G55150 AT2G39380 AT3G52400 AT3G11820 AT2G44490 AT1G18570 AT3G14090
GO:0010556	P	regulation of macromolecule biosynthetic process	89	1564	1843	37767	0.086	0.82	AT5G49520 AT1G64380 AT1G80840 AT1G51700 AT3G21150 AT4G37790 AT3G46600 AT4G23550 AT1G56160 AT5G46350 AT2G37430 AT3G53600 AT1G22810 AT2G40740 AT5G22650 AT4G23810 AT2G31180 AT5G22570 AT3G47640 AT3G56980 AT3G17609 AT1G73500 AT5G46910 AT4G17230 AT2G24570 AT1G66370 AT3G50260 AT1G18570 AT5G15130 AT1G77250 AT2G33710 AT1G06160 AT5G66730 AT4G39780 AT1G10585 AT3G44350 AT4G01250 AT1G68150 AT1G74080 AT1G43160…
GO:0019219	P	regulation of nucleobase, nucleoside, nucleotide and nucleic acid metabolic process	89	1564	1847	37767	0.089	0.85	AT5G49520 AT1G64380 AT1G80840 AT1G51700 AT3G21150 AT4G37790 AT3G46600 AT4G23550 AT1G56160 AT5G46350 AT2G37430 AT3G53600 AT1G22810 AT2G40740 AT5G22650 AT4G23810 AT2G31180 AT5G22570 AT3G47640 AT3G56980 AT3G17609 AT1G73500 AT5G46910 AT4G17230 AT2G24570 AT1G66370 AT3G50260 AT1G18570 AT5G15130 AT1G77250 AT2G33710 AT1G06160 AT5G66730 AT4G39780 AT1G10585 AT3G44350 AT4G01250 AT1G68150 AT1G74080 AT1G43160…
GO:0051171	P	regulation of nitrogen compound metabolic process	90	1564	1888	37767	0.1	0.99	AT5G49520 AT1G64380 AT1G80840 AT1G51700 AT3G21150 AT4G37790 AT3G46600 AT4G23550 AT1G56160 AT5G46350 AT2G37430 AT3G53600 AT1G22810 AT2G40740 AT5G22650 AT4G23810 AT2G31180 AT5G22570 AT3G47640 AT3G56980 AT3G17609 AT1G73500 AT5G46910 AT4G17230 AT2G24570 AT1G66370 AT3G50260 AT1G18570 AT5G15130 AT1G77250 AT2G33710 AT1G06160 AT5G66730 AT4G39780 AT1G10585 AT3G44350 AT4G01250 AT1G68150 AT1G74080 AT1G43160…
GO:0010468	P	regulation of gene expression	95	1564	2001	37767	0.1	0.99	AT5G49520 AT1G64380 AT3G13405 AT1G80840 AT1G51700 AT3G21150 AT4G37790 AT3G46600 AT4G23550 AT1G56160 AT5G46350 AT2G37430 AT3G53600 AT1G22810 AT2G40740 AT4G17788 AT5G22650 AT4G23810 AT2G31180 AT5G22570 AT3G47640 AT3G56980 AT3G17609 AT1G73500 AT5G46910 AT4G17230 AT2G24570 AT1G66370 AT3G50260 AT1G18570 AT5G15130 AT1G77250 AT2G33710 AT3G51375 AT1G06160 AT5G66730 AT5G46845 AT4G39780 AT1G10585 AT3G44350…
GO:0009110	P	vitamin biosynthetic process	6	1564	78	37767	0.1	0.99	AT5G55120 AT1G74710 AT2G18950 AT3G21070 AT3G14990 AT5G64300
GO:0022622	P	root system development	10	1564	255	37767	0.61	1	AT4G31500 AT1G55020 AT2G47000 AT5G45710 AT5G05730 AT2G35510 AT1G74560 AT4G30340 AT3G07390 AT5G13080
GO:0022621	P	shoot system development	6	1564	358	37767	1	1	AT2G28890 AT2G39175 AT5G46845 AT4G30340 AT4G17788 AT3G02150
GO:0009165	P	nucleotide biosynthetic process	6	1564	122	37767	0.39	1	AT3G63380 AT3G21070 AT4G11150 AT1G10700 AT3G25610 AT3G17810
GO:0000003	P	reproduction	38	1564	1186	37767	0.96	1	AT2G47510 AT1G51660 AT2G43790 AT3G54420 AT2G22250 AT5G02100 AT3G24440 AT3G63010 AT3G45640 AT1G61360 AT5G17020 AT1G61610 AT2G39175 AT2G35510 AT5G46845 AT4G17788 AT4G00020 AT1G61800 AT4G39400 AT5G45710 AT4G34710 AT2G46140 AT2G19130 AT1G52690 AT2G02850 AT1G11330 AT1G69490 AT1G19180 AT2G16500 AT1G61370 AT4G11850 AT1G55600 AT4G27300 AT4G11150 AT1G19270 AT1G48130 AT3G18290 AT5G24860
GO:0016458	P	gene silencing	6	1564	138	37767	0.51	1	AT3G13405 AT2G39175 AT2G35160 AT3G51375 AT5G46845 AT4G17788
GO:0015849	P	organic acid transport	5	1564	81	37767	0.25	1	AT4G35180 AT5G40780 AT3G56200 AT5G47560 AT4G21120
GO:0008361	P	regulation of cell size	11	1564	274	37767	0.58	1	AT5G61900 AT4G39400 AT1G69490 AT1G70140 AT1G21270 AT2G06850 AT4G33430 AT3G49120 AT5G17020 AT1G20190 AT2G47000
GO:0019320	P	hexose catabolic process	5	1564	84	37767	0.27	1	AT5G11670 AT3G55410 AT5G40760 AT4G26270 AT5G58330
GO:0006457	P	protein folding	9	1564	275	37767	0.81	1	AT5G22060 AT4G25340 AT3G12580 AT5G02500 AT3G62600 AT3G13310 AT3G14200 AT5G02490 AT1G09080
GO:0009891	P	positive regulation of biosynthetic process	5	1564	76	37767	0.21	1	AT1G73500 AT4G23810 AT1G32640 AT5G47220 AT3G08720
GO:0048569	P	post-embryonic organ development	9	1564	154	37767	0.19	1	AT2G39175 AT1G51660 AT2G43790 AT1G19270 AT5G46845 AT3G63010 AT4G17788 AT3G45640 AT2G02850
GO:0000902	P	cell morphogenesis	7	1564	259	37767	0.91	1	AT4G39400 AT3G49120 AT1G70140 AT2G06850 AT1G21270 AT5G17020 AT1G20190
GO:0048316	P	seed development	13	1564	530	37767	0.99	1	AT3G54420 AT2G16500 AT4G11850 AT2G46140 AT1G55600 AT1G19270 AT1G52690 AT4G11150 AT1G48130 AT2G22250 AT4G34710 AT4G00020 AT3G18290
GO:0019318	P	hexose metabolic process	7	1564	126	37767	0.27	1	AT3G55410 AT4G25900 AT5G58330 AT4G20460 AT5G11670 AT4G26270 AT5G40760
GO:0009260	P	ribonucleotide biosynthetic process	5	1564	89	37767	0.31	1	AT3G63380 AT3G25610 AT3G17810 AT1G10700 AT4G11150
GO:0016070	P	RNA metabolic process	66	1564	1657	37767	0.64	1	AT5G49520 AT1G64380 AT3G23230 AT1G80840 AT2G38470 AT1G32640 AT5G22250 AT5G47220 AT2G31180 AT1G06160 AT1G42990 AT2G44840 AT4G23550 AT2G40750 AT1G56160 AT4G17500 AT3G44260 AT5G46350 AT2G33710 AT5G13330 AT5G56260 AT4G22070 AT1G22810 AT2G40740 AT4G39780 AT1G56650 AT1G74650 AT3G23240 AT1G06180 AT3G23250 AT4G31550 AT5G47230 AT2G46400 AT1G62300 AT2G30250 AT2G23320 AT1G44830 AT2G35160 AT2G46680 AT5G22570…
GO:0048367	P	shoot development	6	1564	355	37767	1	1	AT2G28890 AT2G39175 AT5G46845 AT4G30340 AT4G17788 AT3G02150
GO:0048366	P	leaf development	6	1564	233	37767	0.92	1	AT2G28890 AT2G39175 AT5G46845 AT4G30340 AT4G17788 AT3G02150
GO:0010557	P	positive regulation of macromolecule biosynthetic process	5	1564	69	37767	0.16	1	AT1G73500 AT4G23810 AT1G32640 AT5G47220 AT3G08720
GO:0048364	P	root development	10	1564	255	37767	0.61	1	AT4G31500 AT1G55020 AT2G47000 AT5G45710 AT5G05730 AT2G35510 AT1G74560 AT4G30340 AT3G07390 AT5G13080
GO:0048229	P	gametophyte development	12	1564	233	37767	0.26	1	AT4G00330 AT5G54740 AT4G34200 AT3G02130 AT2G30490 AT1G61140 AT1G19180 AT1G78900 AT4G16760 AT4G33050 AT5G17020 AT4G00020
GO:0009653	P	anatomical structure morphogenesis	22	1564	637	37767	0.83	1	AT3G49120 AT2G47000 AT3G63010 AT4G20380 AT5G17020 AT3G52430 AT1G74560 AT2G35510 AT5G65870 AT3G48090 AT2G06850 AT2G22860 AT3G02150 AT4G00020 AT1G20190 AT4G39400 AT5G45710 AT3G49780 AT1G70140 AT3G07390 AT1G19270 AT1G21270
GO:0015672	P	monovalent inorganic cation transport	6	1564	115	37767	0.34	1	AT1G30270 AT5G47560 AT3G51860 AT4G17615 AT1G78900 AT4G11150
GO:0008283	P	cell proliferation	5	1564	66	37767	0.14	1	AT5G65870 AT2G22860 AT1G74560 AT1G22840 AT3G49780
GO:0044255	P	cellular lipid metabolic process	27	1564	618	37767	0.42	1	AT5G07010 AT4G15340 AT2G47240 AT2G33380 AT1G02400 AT1G17420 AT5G45340 AT4G34250 AT5G42650 AT2G26560 AT2G06050 AT4G15440 AT1G61120 AT1G64400 AT5G03730 AT5G27520 AT5G36150 AT3G45140 AT3G14440 AT4G16760 AT3G25780 AT2G18950 AT5G57190 AT5G27600 AT1G55020 AT3G25760 AT1G72520
GO:0007275	P	multicellular organismal development	82	1564	2020	37767	0.59	1	AT4G31500 AT2G47510 AT2G47000 AT2G17040 AT3G49530 AT1G51660 AT5G05730 AT3G10500 AT2G02850 AT3G54420 AT3G44750 AT3G24440 AT4G00020 AT3G63010 AT5G11520 AT2G28890 AT3G45640 AT5G17020 AT2G30490 AT1G19180 AT2G35980 AT1G61140 AT3G52430 AT5G01550 AT5G01560 AT2G39175 AT3G15500 AT2G35510 AT3G02130 AT5G46845 AT5G65870 AT4G27410 AT4G30340 AT5G39610 AT1G78900 AT5G22380 AT4G02380 AT2G22860 AT3G02150 AT3G04070…
GO:0009826	P	unidimensional cell growth	7	1564	186	37767	0.65	1	AT4G39400 AT3G49120 AT1G70140 AT2G06850 AT1G21270 AT5G17020 AT1G20190
GO:0009639	P	response to red or far red light	6	1564	210	37767	0.87	1	AT4G31500 AT5G52250 AT2G37970 AT1G22280 AT1G02400 AT5G45340
GO:0009739	P	response to gibberellin stimulus	10	1564	159	37767	0.13	1	AT3G09600 AT2G16720 AT1G74670 AT5G24860 AT3G63010 AT1G06180 AT4G30270 AT1G74650 AT1G18570 AT4G25000
GO:0031047	P	gene silencing by RNA	6	1564	110	37767	0.31	1	AT3G13405 AT2G39175 AT2G35160 AT3G51375 AT5G46845 AT4G17788
GO:0035194	P	posttranscriptional gene silencing by RNA	5	1564	98	37767	0.38	1	AT3G51375 AT3G13405 AT2G39175 AT4G17788 AT5G46845
GO:0035195	P	gene silencing by miRNA	5	1564	76	37767	0.21	1	AT3G51375 AT3G13405 AT2G39175 AT4G17788 AT5G46845
GO:0048856	P	anatomical structure development	56	1564	1726	37767	0.97	1	AT4G31500 AT2G47510 AT3G49120 AT1G51660 AT5G05730 AT2G43790 AT3G54420 AT2G22250 AT3G24440 AT3G63010 AT4G20380 AT5G11520 AT2G28890 AT3G45640 AT5G17020 AT2G35980 AT3G52430 AT1G74560 AT2G39175 AT4G30340 AT2G35510 AT5G46845 AT5G65870 AT3G48090 AT2G06850 AT5G39610 AT4G17788 AT2G22860 AT3G02150 AT4G00020 AT1G20190 AT4G11150 AT2G47000 AT4G39400 AT5G45710 AT3G18290 AT3G49780 AT5G03730 AT1G70140 AT2G46140…
GO:0006066	P	alcohol metabolic process	13	1564	270	37767	0.33	1	AT1G66980 AT3G55410 AT5G24160 AT1G66970 AT4G25900 AT2G31390 AT4G20460 AT1G30620 AT5G11670 AT4G26270 AT5G43910 AT5G58330 AT5G40760
GO:0048523	P	negative regulation of cellular process	10	1564	234	37767	0.51	1	AT5G61900 AT5G03730 AT2G35160 AT3G52400 AT3G15210 AT3G11820 AT5G47910 AT1G64060 AT1G02450 AT5G22650
GO:0044249	P	cellular biosynthetic process	210	1564	4925	37767	0.35	1	AT4G31500 AT1G61580 AT1G80840 AT1G64380 AT1G51700 AT2G43790 AT4G39950 AT5G47220 AT3G21150 AT4G37790 AT3G46600 AT4G23550 AT5G14700 AT1G02450 AT1G56160 AT5G24530 AT5G46845 AT2G37430 AT3G53600 AT4G34230 AT2G40740 AT5G57500 AT3G19010 AT1G69370 AT5G49520 AT1G72680 AT5G13930 AT4G11150 AT5G34930 AT4G23810 AT2G31180 AT1G64400 AT5G22570 AT3G47640 AT1G10700 AT3G44720 AT3G56980 AT3G17609 AT5G42800 AT1G73500…
GO:0016441	P	posttranscriptional gene silencing	5	1564	109	37767	0.47	1	AT3G51375 AT3G13405 AT2G39175 AT4G17788 AT5G46845
GO:0016114	P	terpenoid biosynthetic process	5	1564	94	37767	0.35	1	AT4G15340 AT5G36150 AT3G14440 AT1G61120 AT5G03730
GO:0010629	P	negative regulation of gene expression	8	1564	197	37767	0.57	1	AT3G51375 AT2G39175 AT2G35160 AT3G13405 AT5G46845 AT4G17788 AT1G02450 AT5G22650
GO:0006807	P	nitrogen compound metabolic process	167	1564	3826	37767	0.27	1	AT4G31500 AT1G64380 AT1G80840 AT5G47220 AT1G51700 AT2G43790 AT3G06300 AT3G21150 AT4G37790 AT3G46600 AT4G23550 AT1G02450 AT1G56160 AT5G46350 AT2G37430 AT3G53600 AT1G22810 AT2G40740 AT1G08630 AT5G17990 AT1G69370 AT5G49520 AT5G40760 AT5G34930 AT4G23810 AT2G31180 AT2G41880 AT5G38710 AT3G56400 AT5G22570 AT3G47640 AT1G10700 AT4G39950 AT3G56980 AT3G17609 AT1G73500 AT3G09600 AT5G46910 AT1G22410 AT4G17230…
GO:0051186	P	cofactor metabolic process	16	1564	308	37767	0.21	1	AT1G05560 AT5G26030 AT1G74710 AT2G44350 AT5G03290 AT4G29210 AT1G09940 AT4G39640 AT3G21070 AT5G11670 AT1G67810 AT1G19670 AT4G22920 AT4G26910 AT2G43820 AT5G40760
GO:0044260	P	cellular macromolecule metabolic process	273	1564	6447	37767	0.37	1	AT5G49520 AT1G61580 AT1G22810 AT1G80840 AT4G11470 AT1G64380 AT1G51700 AT5G61560 AT3G06300 AT1G70740 AT3G21150 AT1G06160 AT3G44320 AT3G46600 AT4G23550 AT4G39270 AT5G33290 AT1G56160 AT1G67470 AT2G37430 AT3G53600 AT2G17220 AT5G67340 AT1G18570 AT5G20050 AT2G40740 AT5G57500 AT5G20480 AT5G04870 AT4G24940 AT3G15210 AT1G76390 AT5G25440 AT3G46930 AT5G40760 AT2G23200 AT5G58540 AT5G46910 AT2G31180 AT5G65600…
GO:0051188	P	cofactor biosynthetic process	5	1564	191	37767	0.9	1	AT1G67810 AT5G26030 AT1G09940 AT1G74710 AT3G21070
GO:0034613	P	cellular protein localization	10	1564	322	37767	0.86	1	AT4G30600 AT1G76970 AT1G21380 AT5G62600 AT3G24350 AT3G52400 AT4G20110 AT3G11820 AT5G17020 AT1G30900
GO:0009887	P	organ morphogenesis	6	1564	241	37767	0.94	1	AT3G49780 AT1G19270 AT5G65870 AT3G63010 AT2G22860 AT3G02150
GO:0050793	P	regulation of developmental process	5	1564	377	37767	1	1	AT3G24440 AT4G39400 AT3G02150 AT5G24860 AT5G03730
GO:0050790	P	regulation of catalytic activity	5	1564	141	37767	0.7	1	AT1G32970 AT4G30340 AT4G01610 AT2G20900 AT3G45640
GO:0009059	P	macromolecule biosynthetic process	98	1564	3685	37767	1	1	AT5G49520 AT1G61580 AT1G80840 AT1G64380 AT1G51700 AT3G21150 AT4G37790 AT3G46600 AT4G23550 AT5G33290 AT1G56160 AT5G46350 AT2G37430 AT3G53600 AT1G22810 AT2G40740 AT5G57500 AT5G22650 AT4G23810 AT2G31180 AT5G22570 AT3G47640 AT3G56980 AT3G17609 AT1G73500 AT5G46910 AT4G17230 AT2G24570 AT1G66370 AT3G50260 AT1G18570 AT5G15130 AT1G77250 AT1G05570 AT2G33710 AT1G06160 AT5G66730 AT4G39780 AT1G30000 AT1G10585…
GO:0006732	P	coenzyme metabolic process	11	1564	188	37767	0.16	1	AT1G05560 AT1G74710 AT2G44350 AT5G03290 AT4G29210 AT3G21070 AT4G39640 AT5G11670 AT4G26910 AT2G43820 AT5G40760
GO:0070882	P	cellular cell wall organization or biogenesis	6	1564	247	37767	0.94	1	AT1G05560 AT2G18950 AT4G11150 AT1G30620 AT5G33290 AT1G55850
GO:0009892	P	negative regulation of metabolic process	8	1564	236	37767	0.76	1	AT3G51375 AT2G39175 AT2G35160 AT3G13405 AT5G46845 AT4G17788 AT1G02450 AT5G22650
GO:0009259	P	ribonucleotide metabolic process	5	1564	96	37767	0.37	1	AT3G63380 AT3G25610 AT3G17810 AT1G10700 AT4G11150
GO:0048827	P	phyllome development	6	1564	258	37767	0.96	1	AT2G28890 AT2G39175 AT5G46845 AT4G30340 AT4G17788 AT3G02150
GO:0048608	P	reproductive structure development	28	1564	978	37767	0.98	1	AT1G51660 AT2G43790 AT3G54420 AT2G22250 AT3G24440 AT3G63010 AT3G45640 AT2G39175 AT2G35510 AT5G46845 AT4G17788 AT1G19180 AT4G11150 AT4G39400 AT5G45710 AT3G18290 AT2G46140 AT1G52690 AT2G02850 AT1G69490 AT4G00020 AT2G16500 AT4G11850 AT1G55600 AT1G19270 AT1G48130 AT4G34710 AT5G24860
GO:0048731	P	system development	32	1564	839	37767	0.71	1	AT4G31500 AT5G05730 AT2G47000 AT1G51660 AT2G43790 AT3G63010 AT5G11520 AT2G28890 AT3G45640 AT2G35980 AT3G52430 AT1G74560 AT2G39175 AT2G35510 AT5G46845 AT5G65870 AT4G30340 AT5G39610 AT4G17788 AT2G22860 AT3G02150 AT5G45710 AT3G49780 AT5G03730 AT5G13080 AT2G02850 AT1G69490 AT3G07390 AT1G71040 AT1G55600 AT1G19270 AT1G55020
GO:0043933	P	macromolecular complex subunit organization	5	1564	235	37767	0.97	1	AT1G74560 AT4G25940 AT5G17020 AT1G24150 AT5G62600
GO:0034621	P	cellular macromolecular complex subunit organization	5	1564	224	37767	0.96	1	AT1G74560 AT4G25940 AT5G17020 AT1G24150 AT5G62600
GO:0034622	P	cellular macromolecular complex assembly	5	1564	200	37767	0.92	1	AT1G74560 AT4G25940 AT5G17020 AT1G24150 AT5G62600
GO:0009856	P	pollination	9	1564	145	37767	0.15	1	AT1G11330 AT2G47510 AT1G61610 AT1G61370 AT4G27300 AT2G19130 AT1G61360 AT5G17020 AT2G02850
GO:0022414	P	reproductive process	38	1564	1161	37767	0.94	1	AT2G47510 AT1G51660 AT2G43790 AT3G54420 AT2G22250 AT5G02100 AT3G24440 AT3G63010 AT3G45640 AT1G61360 AT5G17020 AT1G61610 AT2G39175 AT2G35510 AT5G46845 AT4G17788 AT4G00020 AT1G61800 AT4G39400 AT5G45710 AT4G34710 AT2G46140 AT2G19130 AT1G52690 AT2G02850 AT1G11330 AT1G69490 AT1G19180 AT2G16500 AT1G61370 AT4G11850 AT1G55600 AT4G27300 AT4G11150 AT1G19270 AT1G48130 AT3G18290 AT5G24860
GO:0005976	P	polysaccharide metabolic process	6	1564	152	37767	0.6	1	AT1G11545 AT1G05570 AT4G24000 AT5G33290 AT1G55850 AT3G23730
GO:0008299	P	isoprenoid biosynthetic process	5	1564	135	37767	0.66	1	AT4G15340 AT5G36150 AT3G14440 AT1G61120 AT5G03730
GO:0006886	P	intracellular protein transport	10	1564	311	37767	0.83	1	AT4G30600 AT1G76970 AT1G21380 AT5G62600 AT3G24350 AT3G52400 AT4G20110 AT3G11820 AT5G17020 AT1G30900
GO:0008104	P	protein localization	14	1564	408	37767	0.8	1	AT4G30600 AT1G76970 AT1G21380 AT5G62600 AT3G60540 AT3G24350 AT3G52400 AT4G20110 AT4G12120 AT3G11820 AT1G29330 AT2G42210 AT5G17020 AT1G30900
GO:0009966	P	regulation of signal transduction	7	1564	128	37767	0.28	1	AT5G03730 AT4G09570 AT3G63010 AT4G18950 AT4G20380 AT3G45640 AT3G15210
GO:0048869	P	cellular developmental process	14	1564	520	37767	0.97	1	AT4G39400 AT3G49120 AT3G49780 AT1G70140 AT1G21270 AT5G65870 AT2G06850 AT1G74560 AT4G33050 AT2G22860 AT5G17020 AT1G20190 AT3G02150 AT2G47000
GO:0040029	P	regulation of gene expression, epigenetic	7	1564	189	37767	0.67	1	AT3G51375 AT2G39175 AT2G35160 AT3G13405 AT5G46845 AT4G17788 AT1G80740
GO:0048513	P	organ development	32	1564	838	37767	0.7	1	AT4G31500 AT5G05730 AT2G47000 AT1G51660 AT2G43790 AT3G63010 AT5G11520 AT2G28890 AT3G45640 AT2G35980 AT3G52430 AT1G74560 AT2G39175 AT2G35510 AT5G46845 AT5G65870 AT4G30340 AT5G39610 AT4G17788 AT2G22860 AT3G02150 AT5G45710 AT3G49780 AT5G03730 AT5G13080 AT2G02850 AT1G69490 AT3G07390 AT1G71040 AT1G55600 AT1G19270 AT1G55020
GO:0008202	P	steroid metabolic process	5	1564	84	37767	0.27	1	AT5G24160 AT5G02100 AT1G76470 AT5G14700 AT2G03760
GO:0048519	P	negative regulation of biological process	23	1564	442	37767	0.16	1	AT3G51375 AT1G59870 AT3G52430 AT1G74710 AT2G39175 AT3G13405 AT5G46845 AT4G17788 AT4G39030 AT5G22650 AT5G61900 AT5G03730 AT2G35160 AT5G47910 AT3G61190 AT1G02450 AT3G15210 AT3G52400 AT1G11310 AT1G19270 AT3G11820 AT1G64060 AT1G64280
GO:0006605	P	protein targeting	7	1564	155	37767	0.46	1	AT4G30600 AT5G62600 AT3G52400 AT4G20110 AT3G11820 AT1G30900 AT5G17020
GO:0045184	P	establishment of protein localization	14	1564	381	37767	0.71	1	AT4G30600 AT1G76970 AT1G21380 AT5G62600 AT3G60540 AT3G24350 AT3G52400 AT4G20110 AT4G12120 AT3G11820 AT1G29330 AT2G42210 AT5G17020 AT1G30900
GO:0003006	P	reproductive developmental process	29	1564	978	37767	0.98	1	AT1G51660 AT2G43790 AT3G54420 AT2G22250 AT3G24440 AT3G63010 AT3G45640 AT5G17020 AT2G39175 AT2G35510 AT5G46845 AT4G17788 AT1G19180 AT4G11150 AT4G39400 AT5G45710 AT3G18290 AT2G46140 AT1G52690 AT2G02850 AT1G69490 AT4G00020 AT2G16500 AT4G11850 AT1G55600 AT1G19270 AT1G48130 AT4G34710 AT5G24860
GO:0016192	P	vesicle-mediated transport	13	1564	272	37767	0.34	1	AT1G76970 AT1G21380 AT2G06530 AT1G07000 AT3G55150 AT3G29400 AT2G39380 AT5G61010 AT1G11890 AT4G25940 AT5G61210 AT3G14090 AT3G10640
GO:0016051	P	carbohydrate biosynthetic process	16	1564	277	37767	0.12	1	AT4G31500 AT1G35910 AT4G39940 AT3G50760 AT5G20830 AT5G57220 AT3G63010 AT1G18590 AT1G05570 AT1G74100 AT4G24000 AT1G30620 AT5G33290 AT1G18570 AT1G62570 AT1G55850
GO:0032535	P	regulation of cellular component size	11	1564	277	37767	0.6	1	AT5G61900 AT4G39400 AT1G69490 AT1G70140 AT1G21270 AT2G06850 AT4G33430 AT3G49120 AT5G17020 AT1G20190 AT2G47000
GO:0022607	P	cellular component assembly	7	1564	265	37767	0.92	1	AT1G05560 AT5G60300 AT5G62600 AT1G24150 AT1G74560 AT4G25940 AT5G17020
GO:0090066	P	regulation of anatomical structure size	11	1564	277	37767	0.6	1	AT5G61900 AT4G39400 AT1G69490 AT1G70140 AT1G21270 AT2G06850 AT4G33430 AT3G49120 AT5G17020 AT1G20190 AT2G47000
GO:0010605	P	negative regulation of macromolecule metabolic process	8	1564	219	37767	0.69	1	AT3G51375 AT2G39175 AT2G35160 AT3G13405 AT5G46845 AT4G17788 AT1G02450 AT5G22650
GO:0043094	P	cellular metabolic compound salvage	5	1564	73	37767	0.19	1	AT2G27730 AT5G52840 AT3G18410 AT2G02050 AT1G49140
GO:0046907	P	intracellular transport	13	1564	463	37767	0.95	1	AT4G30600 AT1G76970 AT1G21380 AT5G62600 AT3G24350 AT3G52400 AT4G20110 AT5G27520 AT3G11820 AT4G24570 AT5G17020 AT4G28390 AT1G30900
GO:0006350	P	transcription	88	1564	1923	37767	0.19	1	AT5G49520 AT1G64380 AT1G80840 AT1G51700 AT3G21150 AT4G37790 AT3G46600 AT4G23550 AT1G56160 AT5G46350 AT2G37430 AT3G53600 AT1G22810 AT2G40740 AT5G22650 AT4G23810 AT2G31180 AT5G22570 AT3G47640 AT3G56980 AT3G17609 AT1G73500 AT5G46910 AT4G17230 AT2G24570 AT1G66370 AT3G50260 AT1G18570 AT5G15130 AT1G77250 AT2G33710 AT1G06160 AT5G66730 AT4G39780 AT1G10585 AT3G44350 AT4G01250 AT1G68150 AT1G74080 AT1G43160…
GO:0030154	P	cell differentiation	8	1564	355	37767	0.98	1	AT1G74560 AT2G47000 AT3G49780 AT5G65870 AT4G33050 AT2G22860 AT5G17020 AT3G02150
GO:0006139	P	nucleobase, nucleoside, nucleotide and nucleic acid metabolic process	108	1564	3198	37767	0.99	1	AT5G49520 AT1G64380 AT1G80840 AT1G51700 AT3G21150 AT4G37790 AT3G46600 AT4G23550 AT1G56160 AT5G46350 AT2G37430 AT3G53600 AT1G22810 AT2G40740 AT4G11150 AT4G23810 AT2G31180 AT2G41880 AT5G22570 AT3G47640 AT1G10700 AT3G56980 AT3G17609 AT1G73500 AT5G46910 AT4G17230 AT2G24570 AT1G66370 AT3G50260 AT1G18570 AT5G15130 AT1G77250 AT2G40750 AT2G33710 AT3G21070 AT1G06160 AT5G66730 AT1G30620 AT3G57550 AT4G39780…
GO:0046365	P	monosaccharide catabolic process	5	1564	84	37767	0.27	1	AT5G11670 AT3G55410 AT5G40760 AT4G26270 AT5G58330
GO:0006508	P	proteolysis	20	1564	810	37767	1	1	AT1G44350 AT1G44130 AT2G39710 AT3G02875 AT4G15100 AT4G25110 AT4G01610 AT1G32940 AT1G24140 AT3G49340 AT1G51780 AT3G51330 AT5G60360 AT5G10760 AT1G21410 AT5G19110 AT3G15710 AT5G22860 AT5G48430 AT1G32970
GO:0060560	P	developmental growth involved in morphogenesis	7	1564	186	37767	0.65	1	AT4G39400 AT3G49120 AT1G70140 AT2G06850 AT1G21270 AT5G17020 AT1G20190
GO:0032502	P	developmental process	95	1564	2304	37767	0.53	1	AT4G31500 AT2G47510 AT3G49530 AT1G51660 AT2G43790 AT5G01550 AT5G14930 AT3G49620 AT5G39610 AT4G17788 AT4G00020 AT4G11150 AT4G00330 AT5G46590 AT2G43000 AT5G01540 AT3G07390 AT1G71040 AT4G34200 AT5G60360 AT3G18290 AT3G49120 AT3G10500 AT2G22250 AT5G11520 AT5G17020 AT3G02130 AT5G46845 AT5G65870 AT4G27410 AT2G06850 AT2G29350 AT3G04070 AT1G20190 AT1G02820 AT1G70140 AT5G01560 AT3G44350 AT2G16500 AT4G11850…
GO:0032501	P	multicellular organismal process	91	1564	2094	37767	0.34	1	AT4G31500 AT2G47510 AT3G49530 AT1G51660 AT2G43790 AT5G01550 AT1G61610 AT2G35510 AT4G30340 AT5G39610 AT4G17788 AT4G00020 AT4G11150 AT2G19130 AT4G00330 AT5G46590 AT2G43000 AT1G11330 AT5G01540 AT3G07390 AT1G71040 AT1G61370 AT4G34200 AT4G27300 AT3G18290 AT3G10500 AT2G22250 AT5G11520 AT1G61360 AT5G17020 AT3G02130 AT5G46845 AT5G65870 AT4G27410 AT3G04070 AT1G02820 AT5G01560 AT3G44350 AT2G16500 AT4G11850…
GO:0006721	P	terpenoid metabolic process	7	1564	126	37767	0.27	1	AT1G02400 AT5G03730 AT4G15340 AT5G36150 AT3G14440 AT1G61120 AT5G45340
GO:0006720	P	isoprenoid metabolic process	7	1564	168	37767	0.55	1	AT1G02400 AT5G03730 AT4G15340 AT5G36150 AT3G14440 AT1G61120 AT5G45340
GO:0010154	P	fruit development	17	1564	557	37767	0.92	1	AT5G45710 AT3G54420 AT2G16500 AT2G39175 AT4G11850 AT2G46140 AT4G17788 AT1G55600 AT1G19270 AT1G52690 AT5G46845 AT1G48130 AT2G22250 AT4G34710 AT4G00020 AT3G18290 AT4G11150
GO:0006006	P	glucose metabolic process	5	1564	86	37767	0.28	1	AT5G11670 AT3G55410 AT5G40760 AT4G26270 AT5G58330
GO:0006007	P	glucose catabolic process	5	1564	83	37767	0.26	1	AT5G11670 AT3G55410 AT5G40760 AT4G26270 AT5G58330
GO:0032989	P	cellular component morphogenesis	7	1564	289	37767	0.96	1	AT4G39400 AT3G49120 AT1G70140 AT2G06850 AT1G21270 AT5G17020 AT1G20190
GO:0009058	P	biosynthetic process	221	1564	5118	37767	0.29	1	AT4G31500 AT1G61580 AT1G80840 AT1G64380 AT1G51700 AT2G43790 AT4G39950 AT5G47220 AT3G21150 AT4G37790 AT3G46600 AT4G23550 AT5G14700 AT1G02450 AT1G56160 AT5G24530 AT5G46845 AT2G37430 AT3G53600 AT4G34230 AT2G40740 AT5G57500 AT3G19010 AT1G69370 AT5G49520 AT1G72680 AT5G13930 AT4G11150 AT5G34930 AT4G23810 AT2G31180 AT1G64400 AT3G50760 AT5G22570 AT4G19460 AT3G47640 AT1G10700 AT3G44720 AT3G56980 AT3G17609…
GO:0051649	P	establishment of localization in cell	21	1564	525	37767	0.6	1	AT4G30600 AT1G76970 AT1G21380 AT1G07000 AT5G62600 AT3G29400 AT2G39380 AT3G52400 AT5G27520 AT5G61010 AT3G24350 AT4G20110 AT4G12120 AT3G11820 AT1G66480 AT3G55150 AT4G24570 AT5G17020 AT4G28390 AT3G14090 AT1G30900
GO:0009056	P	catabolic process	53	1564	1307	37767	0.58	1	AT2G29470 AT1G02400 AT2G44350 AT2G29460 AT3G44320 AT5G58330 AT5G44070 AT1G10370 AT5G62150 AT3G47540 AT5G45340 AT1G59870 AT1G02360 AT1G08630 AT1G27130 AT4G16760 AT4G26270 AT4G29210 AT1G17170 AT1G19670 AT5G40760 AT1G02930 AT4G01700 AT3G55410 AT1G21410 AT4G39640 AT5G27520 AT2G02390 AT3G30775 AT2G23770 AT1G69930 AT1G17190 AT4G39950 AT2G33580 AT4G22920 AT4G26910 AT3G47340 AT1G74590 AT5G48180 AT5G46180…
GO:0009057	P	macromolecule catabolic process	11	1564	982	37767	1	1	AT5G48180 AT3G55410 AT1G21410 AT3G44320 AT5G58330 AT5G44070 AT2G44490 AT5G11670 AT4G26270 AT5G40760 AT1G59870
GO:0046942	P	carboxylic acid transport	5	1564	81	37767	0.25	1	AT4G35180 AT5G40780 AT3G56200 AT5G47560 AT4G21120
GO:0006820	P	anion transport	5	1564	72	37767	0.18	1	AT5G50200 AT4G19030 AT1G32450 AT2G17290 AT4G21120
GO:0010604	P	positive regulation of macromolecule metabolic process	5	1564	76	37767	0.21	1	AT1G73500 AT4G23810 AT1G32640 AT5G47220 AT3G08720
GO:0070727	P	cellular macromolecule localization	19	1564	341	37767	0.12	1	AT4G31500 AT1G76970 AT1G21380 AT5G57220 AT5G62600 AT3G24350 AT3G52400 AT5G46330 AT3G54640 AT4G20110 AT5G44070 AT3G11820 AT2G44490 AT4G39950 AT4G30600 AT1G18570 AT5G17020 AT1G30900 AT1G59870
GO:0010608	P	posttranscriptional regulation of gene expression	6	1564	144	37767	0.55	1	AT3G13405 AT2G39175 AT3G51375 AT5G46845 AT4G17788 AT3G08720
GO:0006767	P	water-soluble vitamin metabolic process	6	1564	102	37767	0.25	1	AT1G05560 AT5G55120 AT3G21070 AT3G14990 AT2G43820 AT5G64300
GO:0006766	P	vitamin metabolic process	8	1564	122	37767	0.14	1	AT1G05560 AT5G55120 AT1G74710 AT2G18950 AT3G21070 AT3G14990 AT2G43820 AT5G64300
GO:0060255	P	regulation of macromolecule metabolic process	96	1564	2060	37767	0.14	1	AT5G49520 AT1G64380 AT3G13405 AT1G80840 AT1G51700 AT3G21150 AT4G37790 AT3G46600 AT4G23550 AT1G56160 AT5G46350 AT2G37430 AT3G53600 AT1G22810 AT2G40740 AT4G17788 AT5G22650 AT4G23810 AT2G31180 AT5G22570 AT3G47640 AT3G56980 AT3G17609 AT1G73500 AT5G46910 AT4G17230 AT2G24570 AT1G66370 AT3G50260 AT1G18570 AT5G15130 AT1G77250 AT2G33710 AT3G51375 AT1G06160 AT5G66730 AT5G46845 AT4G39780 AT1G10585 AT3G44350…
GO:0048589	P	developmental growth	11	1564	242	37767	0.42	1	AT4G39400 AT3G49120 AT2G39175 AT1G70140 AT1G21270 AT5G46845 AT2G06850 AT4G17788 AT5G17020 AT1G20190 AT2G47000
GO:0016049	P	cell growth	10	1564	265	37767	0.66	1	AT4G39400 AT1G69490 AT1G70140 AT1G21270 AT2G06850 AT4G33430 AT3G49120 AT5G17020 AT1G20190 AT2G47000
GO:0016044	P	cellular membrane organization	6	1564	114	37767	0.33	1	AT3G24350 AT3G52400 AT1G55020 AT4G25940 AT3G11820 AT5G61210
GO:0016043	P	cellular component organization	28	1564	1179	37767	1	1	AT5G60300 AT3G49120 AT5G62600 AT4G22880 AT3G24350 AT1G59910 AT5G17020 AT1G24150 AT3G11820 AT1G74560 AT2G06850 AT1G78900 AT1G20190 AT4G11150 AT1G05560 AT4G39400 AT2G35160 AT1G70140 AT1G66480 AT4G33050 AT3G24440 AT3G07390 AT2G18950 AT3G52400 AT1G55020 AT4G25940 AT1G21270 AT5G61210
GO:0065003	P	macromolecular complex assembly	5	1564	210	37767	0.94	1	AT1G74560 AT4G25940 AT5G17020 AT1G24150 AT5G62600
GO:0065009	P	regulation of molecular function	7	1564	153	37767	0.45	1	AT1G32970 AT2G17290 AT1G32640 AT4G01610 AT2G20900 AT4G30340 AT3G45640
GO:0009791	P	post-embryonic development	36	1564	705	37767	0.12	1	AT5G05730 AT1G51660 AT2G43790 AT3G54420 AT2G22250 AT3G24440 AT3G63010 AT3G45640 AT5G01550 AT2G39175 AT2G35510 AT5G46845 AT1G74560 AT4G17788 AT4G00020 AT4G11150 AT4G39400 AT5G45710 AT3G18290 AT2G46140 AT5G01540 AT1G52690 AT3G07390 AT5G13080 AT5G01560 AT2G02850 AT3G54810 AT1G69490 AT1G19180 AT2G16500 AT4G11850 AT1G55600 AT1G19270 AT1G48130 AT4G34710 AT5G24860
GO:0009790	P	embryonic development	11	1564	535	37767	1	1	AT1G02820 AT4G11850 AT2G35510 AT2G46140 AT3G54420 AT1G52690 AT2G22250 AT3G18290 AT4G02380 AT4G00020 AT4G11150
GO:0009793	P	embryonic development ending in seed dormancy	8	1564	465	37767	1	1	AT4G11850 AT2G46140 AT3G54420 AT2G22250 AT1G52690 AT3G18290 AT4G00020 AT4G11150
GO:0034645	P	cellular macromolecule biosynthetic process	96	1564	3661	37767	1	1	AT5G49520 AT1G61580 AT1G80840 AT1G64380 AT1G51700 AT3G21150 AT4G37790 AT3G46600 AT4G23550 AT5G33290 AT1G56160 AT5G46350 AT2G37430 AT3G53600 AT1G22810 AT2G40740 AT5G57500 AT5G22650 AT4G23810 AT2G31180 AT5G22570 AT3G47640 AT3G56980 AT3G17609 AT1G73500 AT5G46910 AT4G17230 AT2G24570 AT1G66370 AT3G50260 AT1G18570 AT5G15130 AT1G77250 AT1G05570 AT2G33710 AT1G06160 AT5G66730 AT4G39780 AT1G30000 AT1G10585…
GO:0010646	P	regulation of cell communication	7	1564	131	37767	0.3	1	AT5G03730 AT4G09570 AT3G63010 AT4G18950 AT4G20380 AT3G45640 AT3G15210
GO:0009553	P	embryo sac development	5	1564	107	37767	0.46	1	AT4G33050 AT4G34200 AT5G17020 AT4G00020 AT1G61140
GO:0009555	P	pollen development	8	1564	148	37767	0.27	1	AT4G00330 AT5G54740 AT3G02130 AT2G30490 AT1G78900 AT4G16760 AT5G17020 AT1G19180
GO:0008610	P	lipid biosynthetic process	23	1564	439	37767	0.15	1	AT4G15340 AT2G47240 AT1G17420 AT2G26560 AT4G34250 AT5G42650 AT5G24160 AT2G06050 AT5G14700 AT1G61120 AT1G64400 AT5G03730 AT5G36150 AT3G45140 AT3G14440 AT4G16760 AT3G25780 AT1G76470 AT2G18950 AT5G57190 AT1G55020 AT3G25760 AT1G72520
GO:0006996	P	organelle organization	13	1564	640	37767	1	1	AT1G05560 AT1G74560 AT4G22880 AT2G35160 AT1G70140 AT1G24150 AT3G24440 AT1G59910 AT4G25940 AT1G66480 AT1G78900 AT4G33050 AT4G11150
GO:0046164	P	alcohol catabolic process	5	1564	89	37767	0.31	1	AT5G11670 AT3G55410 AT5G40760 AT4G26270 AT5G58330
GO:0055085	P	transmembrane transport	13	1564	244	37767	0.22	1	AT2G47800 AT3G23550 AT2G17290 AT5G61520 AT1G66780 AT1G71140 AT4G11150 AT2G04050 AT1G61890 AT2G04070 AT4G36670 AT1G15520 AT1G59870
GO:0055086	P	nucleobase, nucleoside and nucleotide metabolic process	13	1564	221	37767	0.13	1	AT3G63380 AT2G41880 AT4G29690 AT3G21070 AT3G17810 AT4G24340 AT5G11670 AT1G10700 AT4G29700 AT3G57550 AT3G25610 AT5G40760 AT4G11150
GO:0005996	P	monosaccharide metabolic process	10	1564	168	37767	0.16	1	AT3G55410 AT4G25900 AT2G31390 AT4G20460 AT1G30620 AT5G11670 AT4G26270 AT5G43910 AT5G58330 AT5G40760
GO:0043170	P	macromolecule metabolic process	305	1564	7127	37767	0.31	1	AT5G49520 AT1G61580 AT1G22810 AT1G80840 AT4G11470 AT1G64380 AT1G51700 AT5G61560 AT3G06300 AT1G70740 AT3G21150 AT1G06160 AT3G44320 AT3G46600 AT4G23550 AT4G39270 AT5G62150 AT5G33290 AT1G56160 AT1G67470 AT3G08870 AT2G37430 AT3G28450 AT2G17220 AT5G67340 AT1G18570 AT4G25110 AT5G20050 AT2G40740 AT5G57500 AT4G01610 AT5G04870 AT4G24940 AT3G15210 AT5G48380 AT5G10760 AT1G76390 AT4G17788 AT3G51375 AT3G46930…
GO:0031328	P	positive regulation of cellular biosynthetic process	5	1564	76	37767	0.21	1	AT1G73500 AT4G23810 AT1G32640 AT5G47220 AT3G08720
GO:0040007	P	growth	19	1564	340	37767	0.12	1	AT4G39400 AT1G69490 AT1G19270 AT2G47000 AT2G39175 AT1G70140 AT1G21270 AT1G17420 AT5G46845 AT1G55020 AT2G06850 AT4G33430 AT4G17788 AT5G17020 AT2G30490 AT1G20190 AT3G49120 AT1G72520 AT1G27730
GO:0048437	P	floral organ development	9	1564	152	37767	0.18	1	AT2G39175 AT1G51660 AT2G43790 AT1G19270 AT5G46845 AT3G63010 AT4G17788 AT3G45640 AT2G02850
GO:0010467	P	gene expression	98	1564	3962	37767	1	1	AT5G49520 AT1G61580 AT3G51375 AT1G80840 AT1G64380 AT1G51700 AT3G21150 AT4G37790 AT3G46600 AT4G23550 AT1G56160 AT5G46350 AT2G37430 AT3G53600 AT1G22810 AT2G40740 AT4G17788 AT5G22650 AT4G23810 AT2G31180 AT5G22570 AT3G47640 AT3G56980 AT3G17609 AT1G73500 AT5G46910 AT4G17230 AT2G24570 AT1G66370 AT3G50260 AT1G18570 AT5G15130 AT1G77250 AT2G33710 AT3G15710 AT3G13405 AT1G06160 AT5G66730 AT5G46845 AT4G39780…
GO:0009908	P	flower development	14	1564	377	37767	0.7	1	AT4G39400 AT1G69490 AT2G39175 AT1G51660 AT2G43790 AT1G19270 AT5G46845 AT3G24440 AT3G63010 AT4G17788 AT3G45640 AT1G19180 AT5G24860 AT2G02850
GO:0048438	P	floral whorl development	7	1564	133	37767	0.31	1	AT2G39175 AT2G43790 AT1G19270 AT5G46845 AT4G17788 AT3G45640 AT2G02850
GO:0044265	P	cellular macromolecule catabolic process	11	1564	465	37767	0.99	1	AT5G48180 AT3G55410 AT1G21410 AT3G44320 AT5G58330 AT5G44070 AT2G44490 AT5G11670 AT4G26270 AT5G40760 AT1G59870
GO:0007154	P	cell communication	22	1564	1399	37767	1	1	AT5G45380 AT3G44320 AT3G63010 AT4G20380 AT1G55920 AT3G45640 AT1G61360 AT1G61610 AT3G49620 AT4G02380 AT5G03730 AT4G09570 AT2G19130 AT3G47340 AT3G15210 AT1G11330 AT1G71040 AT5G27420 AT1G61370 AT4G27300 AT4G18950 AT1G20630
GO:0044085	P	cellular component biogenesis	10	1564	571	37767	1	1	AT1G05560 AT5G60300 AT5G62600 AT1G24150 AT4G11150 AT1G74560 AT4G25940 AT1G30620 AT5G17020 AT1G55850
GO:0015031	P	protein transport	14	1564	381	37767	0.71	1	AT4G30600 AT1G76970 AT1G21380 AT5G62600 AT3G60540 AT3G24350 AT3G52400 AT4G20110 AT4G12120 AT3G11820 AT1G29330 AT2G42210 AT5G17020 AT1G30900
GO:0003824	F	catalytic activity	759	1564	9638	37767	1.1e-46	1.4e-43	AT1G06620 AT1G51660 AT5G61560 AT5G02290 AT3G47520 AT5G64100 AT1G28390 AT1G67470 AT1G16150 AT3G59350 AT3G51430 AT2G02800 AT4G10390 AT3G12500 AT1G08630 AT2G47800 AT5G48380 AT3G15020 AT5G15730 AT5G34930 AT1G04680 AT3G44320 AT4G04500 AT5G17380 AT5G61310 AT1G05010 AT2G19130 AT2G39030 AT5G19110 AT2G26740 AT4G15100 AT1G19670 AT1G73500 AT1G26390 AT5G27420 AT1G74360 AT1G45145 AT4G23150 AT2G40270 AT1G07260…
GO:0016301	F	kinase activity	212	1564	1641	37767	2e-44	1.2e-41	AT4G11470 AT5G61560 AT5G24430 AT1G70740 AT1G73500 AT1G28390 AT3G09830 AT2G32680 AT3G13380 AT1G67470 AT3G59350 AT2G02800 AT2G17220 AT1G61610 AT1G51660 AT1G69270 AT4G10390 AT5G04870 AT4G23260 AT4G30340 AT5G25440 AT2G46500 AT3G46930 AT2G43790 AT2G23200 AT5G58540 AT5G02290 AT2G41880 AT5G38210 AT5G45840 AT1G74330 AT4G09570 AT1G66970 AT2G19130 AT5G47070 AT4G18250 AT3G55450 AT1G11330 AT5G01540 AT4G00330…
GO:0016740	F	transferase activity	324	1564	3321	37767	1.2e-39	5e-37	AT4G23280 AT5G01550 AT1G33030 AT4G11470 AT5G61560 AT5G24430 AT1G70740 AT5G07010 AT1G73500 AT1G28390 AT3G09830 AT5G33290 AT2G32680 AT3G13380 AT1G67470 AT3G59350 AT2G02800 AT2G31880 AT2G17220 AT1G61610 AT1G51660 AT1G69270 AT3G28450 AT4G10390 AT5G57500 AT5G01560 AT2G06850 AT4G23260 AT4G30340 AT1G21120 AT5G25440 AT2G03760 AT2G46500 AT3G46930 AT2G43790 AT2G23200 AT5G58540 AT5G02290 AT2G41880 AT1G67980…
GO:0016772	F	transferase activity, transferring phosphorus-containing groups	218	1564	1887	37767	3e-38	9.2e-36	AT4G11470 AT5G61560 AT5G24430 AT1G70740 AT1G73500 AT1G28390 AT3G09830 AT2G32680 AT3G13380 AT1G67470 AT3G59350 AT2G02800 AT2G17220 AT1G61610 AT1G51660 AT1G69270 AT4G10390 AT5G04870 AT4G23260 AT4G30340 AT5G25440 AT2G46500 AT3G46930 AT2G43790 AT2G23200 AT5G58540 AT5G02290 AT2G41880 AT5G38210 AT4G14680 AT5G45840 AT1G74330 AT4G09570 AT1G66970 AT2G19130 AT5G47070 AT4G18250 AT3G55450 AT1G11330 AT5G01540…
GO:0016491	F	oxidoreductase activity	160	1564	1463	37767	1.6e-26	3.9e-24	AT4G31500 AT1G06620 AT5G18600 AT4G38540 AT4G05020 AT4G37990 AT3G06300 AT3G47520 AT2G33380 AT5G64100 AT5G24530 AT2G34500 AT4G04610 AT1G26380 AT4G35260 AT3G15020 AT2G29720 AT5G44390 AT3G03100 AT5G40760 AT5G34930 AT5G05600 AT5G61310 AT4G17720 AT5G50850 AT1G23800 AT4G08770 AT5G42800 AT1G26390 AT4G21830 AT4G30210 AT1G45145 AT1G24180 AT4G02580 AT1G64060 AT3G14440 AT2G29340 AT1G09500 AT5G16980 AT5G05340…
GO:0004672	F	protein kinase activity	111	1564	953	37767	2.9e-21	6e-19	AT4G11470 AT5G61560 AT5G24430 AT1G70740 AT1G73500 AT1G28390 AT3G09830 AT3G13380 AT1G67470 AT3G59350 AT2G17220 AT1G61610 AT1G51660 AT1G69270 AT4G10390 AT5G04870 AT4G23260 AT3G46930 AT2G43790 AT5G58540 AT5G45840 AT1G74330 AT4G09570 AT2G19130 AT5G47070 AT5G25440 AT3G55450 AT1G11330 AT1G61370 AT4G27300 AT3G20410 AT5G63410 AT1G66880 AT2G32800 AT1G01560 AT2G02220 AT3G09010 AT1G16330 AT1G61360 AT4G29810…
GO:0016773	F	phosphotransferase activity, alcohol group as acceptor	121	1564	1154	37767	2.7e-19	4.8e-17	AT4G11470 AT5G61560 AT5G24430 AT1G70740 AT1G73500 AT1G28390 AT3G09830 AT3G13380 AT1G67470 AT3G59350 AT2G17220 AT1G61610 AT1G51660 AT1G69270 AT4G10390 AT5G04870 AT4G23260 AT4G30340 AT3G46930 AT2G43790 AT5G58540 AT5G45840 AT1G74330 AT4G09570 AT2G19130 AT5G47070 AT5G25440 AT3G55450 AT1G11330 AT1G61370 AT4G27300 AT3G20410 AT5G63410 AT1G66880 AT2G32800 AT1G01560 AT2G02220 AT4G39940 AT4G28350 AT3G09010…
GO:0004674	F	protein serine/threonine kinase activity	82	1564	681	37767	4.1e-17	6.3e-15	AT3G17410 AT1G18890 AT1G01560 AT2G02220 AT4G11470 AT5G20480 AT2G47060 AT5G61560 AT5G24430 AT3G02880 AT1G35710 AT4G27300 AT4G00970 AT1G28390 AT4G39270 AT3G09010 AT3G45640 AT1G61360 AT2G05940 AT3G55450 AT1G16330 AT4G08500 AT3G14840 AT4G25390 AT2G17220 AT1G61610 AT2G17290 AT1G69270 AT1G68690 AT4G23200 AT3G59350 AT1G30270 AT5G45840 AT3G02130 AT1G21270 AT4G23260 AT2G43790 AT1G74330 AT4G35310 AT1G66920…
GO:0001883	F	purine nucleoside binding	133	1564	1465	37767	6.2e-16	6.8e-14	AT4G11470 AT3G04210 AT5G44870 AT5G61560 AT5G24430 AT1G70740 AT3G50950 AT3G28540 AT1G28390 AT3G09830 AT1G67470 AT3G59350 AT1G17600 AT2G17220 AT1G61610 AT4G10390 AT4G23260 AT1G26380 AT4G11170 AT5G44390 AT5G15730 AT5G66900 AT2G20420 AT5G58540 AT1G26390 AT5G45840 AT1G74330 AT2G19130 AT5G47070 AT5G25440 AT3G55450 AT5G41550 AT1G11330 AT4G24970 AT1G61370 AT2G05710 AT4G27300 AT5G63410 AT1G66880 AT4G16920…
GO:0001882	F	nucleoside binding	133	1564	1465	37767	6.2e-16	6.8e-14	AT4G11470 AT3G04210 AT5G44870 AT5G61560 AT5G24430 AT1G70740 AT3G50950 AT3G28540 AT1G28390 AT3G09830 AT1G67470 AT3G59350 AT1G17600 AT2G17220 AT1G61610 AT4G10390 AT4G23260 AT1G26380 AT4G11170 AT5G44390 AT5G15730 AT5G66900 AT2G20420 AT5G58540 AT1G26390 AT5G45840 AT1G74330 AT2G19130 AT5G47070 AT5G25440 AT3G55450 AT5G41550 AT1G11330 AT4G24970 AT1G61370 AT2G05710 AT4G27300 AT5G63410 AT1G66880 AT4G16920…
GO:0030554	F	adenyl nucleotide binding	133	1564	1465	37767	6.2e-16	6.8e-14	AT4G11470 AT3G04210 AT5G44870 AT5G61560 AT5G24430 AT1G70740 AT3G50950 AT3G28540 AT1G28390 AT3G09830 AT1G67470 AT3G59350 AT1G17600 AT2G17220 AT1G61610 AT4G10390 AT4G23260 AT1G26380 AT4G11170 AT5G44390 AT5G15730 AT5G66900 AT2G20420 AT5G58540 AT1G26390 AT5G45840 AT1G74330 AT2G19130 AT5G47070 AT5G25440 AT3G55450 AT5G41550 AT1G11330 AT4G24970 AT1G61370 AT2G05710 AT4G27300 AT5G63410 AT1G66880 AT4G16920…
GO:0004888	F	transmembrane receptor activity	35	1564	171	37767	6.5e-15	6.6e-13	AT5G58120 AT2G13790 AT3G21630 AT5G44910 AT3G04210 AT5G44870 AT5G46330 AT4G19510 AT1G66090 AT3G44630 AT3G44400 AT5G45000 AT1G17600 AT1G72940 AT1G72900 AT5G41740 AT1G72920 AT4G11170 AT1G56540 AT5G40910 AT1G17610 AT3G04220 AT5G11250 AT5G36930 AT5G46520 AT4G18250 AT4G21380 AT5G22690 AT2G32140 AT5G41550 AT1G72950 AT1G57630 AT1G63750 AT1G69550 AT4G16920
GO:0005524	F	ATP binding	122	1564	1377	37767	4.4e-14	3.8e-12	AT4G11470 AT3G04210 AT5G44870 AT5G61560 AT5G24430 AT1G70740 AT3G50950 AT3G28540 AT1G28390 AT3G09830 AT1G67470 AT3G59350 AT1G17600 AT2G17220 AT1G61610 AT4G10390 AT4G23260 AT4G11170 AT5G15730 AT5G66900 AT2G20420 AT5G58540 AT5G45840 AT1G74330 AT2G19130 AT5G47070 AT5G25440 AT3G55450 AT5G41550 AT1G11330 AT4G24970 AT1G61370 AT2G05710 AT4G27300 AT5G63410 AT1G66880 AT4G16920 AT2G32800 AT2G02220 AT4G39940…
GO:0004872	F	receptor activity	38	1564	212	37767	4.2e-14	3.8e-12	AT5G58120 AT2G13790 AT3G21630 AT2G02220 AT5G44910 AT3G04210 AT5G44870 AT5G46330 AT4G19510 AT1G66090 AT3G44630 AT5G17020 AT5G45000 AT3G44400 AT1G17600 AT1G72940 AT1G72900 AT5G41740 AT1G72920 AT4G11170 AT1G56540 AT5G40910 AT1G17610 AT3G04220 AT5G11250 AT5G36930 AT5G46520 AT4G18250 AT4G21380 AT1G29330 AT5G22690 AT2G32140 AT5G41550 AT1G72950 AT1G57630 AT1G63750 AT1G69550 AT4G16920
GO:0032559	F	adenyl ribonucleotide binding	122	1564	1384	37767	6.2e-14	5e-12	AT4G11470 AT3G04210 AT5G44870 AT5G61560 AT5G24430 AT1G70740 AT3G50950 AT3G28540 AT1G28390 AT3G09830 AT1G67470 AT3G59350 AT1G17600 AT2G17220 AT1G61610 AT4G10390 AT4G23260 AT4G11170 AT5G15730 AT5G66900 AT2G20420 AT5G58540 AT5G45840 AT1G74330 AT2G19130 AT5G47070 AT5G25440 AT3G55450 AT5G41550 AT1G11330 AT4G24970 AT1G61370 AT2G05710 AT4G27300 AT5G63410 AT1G66880 AT4G16920 AT2G32800 AT2G02220 AT4G39940…
GO:0017076	F	purine nucleotide binding	138	1564	1713	37767	1.3e-12	9.8e-11	AT4G11470 AT3G04210 AT5G44870 AT5G61560 AT5G24430 AT1G70740 AT3G50950 AT3G28540 AT1G28390 AT3G09830 AT1G67470 AT3G59350 AT1G17600 AT2G17220 AT1G61610 AT4G10390 AT4G23260 AT1G26380 AT4G11170 AT5G44390 AT5G15730 AT5G66900 AT2G20420 AT4G30600 AT1G26390 AT5G45840 AT1G74330 AT2G19130 AT5G47070 AT5G25440 AT3G55450 AT5G41550 AT1G11330 AT4G24970 AT4G39890 AT1G61370 AT2G05710 AT4G27300 AT5G63410 AT1G66880…
GO:0030246	F	carbohydrate binding	29	1564	162	37767	3.9e-11	2.8e-09	AT5G60300 AT5G03700 AT5G03350 AT4G28350 AT4G25900 AT1G65390 AT1G61360 AT5G18470 AT4G21390 AT2G02310 AT2G43620 AT3G16030 AT1G61380 AT1G78820 AT5G45090 AT2G19130 AT2G26400 AT3G16530 AT5G60900 AT1G11330 AT1G63090 AT1G61370 AT5G62620 AT4G27300 AT2G43570 AT4G29050 AT1G61610 AT3G04720 AT2G43590
GO:0032555	F	purine ribonucleotide binding	127	1564	1631	37767	7.4e-11	4.7e-09	AT4G11470 AT3G04210 AT5G44870 AT5G61560 AT5G24430 AT1G70740 AT3G50950 AT3G28540 AT1G28390 AT3G09830 AT1G67470 AT3G59350 AT1G17600 AT2G17220 AT1G61610 AT4G10390 AT4G23260 AT4G11170 AT5G15730 AT5G66900 AT2G20420 AT4G30600 AT5G45840 AT1G74330 AT2G19130 AT5G47070 AT5G25440 AT3G55450 AT5G41550 AT1G11330 AT4G24970 AT4G39890 AT1G61370 AT2G05710 AT4G27300 AT5G63410 AT1G66880 AT4G16920 AT2G32800 AT2G02220…
GO:0032553	F	ribonucleotide binding	127	1564	1631	37767	7.4e-11	4.7e-09	AT4G11470 AT3G04210 AT5G44870 AT5G61560 AT5G24430 AT1G70740 AT3G50950 AT3G28540 AT1G28390 AT3G09830 AT1G67470 AT3G59350 AT1G17600 AT2G17220 AT1G61610 AT4G10390 AT4G23260 AT4G11170 AT5G15730 AT5G66900 AT2G20420 AT4G30600 AT5G45840 AT1G74330 AT2G19130 AT5G47070 AT5G25440 AT3G55450 AT5G41550 AT1G11330 AT4G24970 AT4G39890 AT1G61370 AT2G05710 AT4G27300 AT5G63410 AT1G66880 AT4G16920 AT2G32800 AT2G02220…
GO:0060089	F	molecular transducer activity	49	1564	422	37767	2e-10	1.2e-08	AT4G08500 AT5G58120 AT2G13790 AT3G21630 AT2G02220 AT5G44910 AT3G04210 AT5G44870 AT2G43790 AT5G46330 AT4G19510 AT1G66090 AT3G44630 AT3G45640 AT1G01560 AT5G17020 AT5G45000 AT3G44400 AT1G17600 AT1G72940 AT1G69270 AT1G72900 AT5G41740 AT3G48090 AT1G72920 AT1G64610 AT1G56540 AT5G40910 AT4G01370 AT1G17610 AT3G04220 AT5G11250 AT4G34390 AT5G36930 AT5G46520 AT4G18250 AT4G21380 AT4G11170 AT1G29330 AT5G22690…
GO:0004871	F	signal transducer activity	49	1564	422	37767	2e-10	1.2e-08	AT4G08500 AT5G58120 AT2G13790 AT3G21630 AT2G02220 AT5G44910 AT3G04210 AT5G44870 AT2G43790 AT5G46330 AT4G19510 AT1G66090 AT3G44630 AT3G45640 AT1G01560 AT5G17020 AT5G45000 AT3G44400 AT1G17600 AT1G72940 AT1G69270 AT1G72900 AT5G41740 AT3G48090 AT1G72920 AT1G64610 AT1G56540 AT5G40910 AT4G01370 AT1G17610 AT3G04220 AT5G11250 AT4G34390 AT5G36930 AT5G46520 AT4G18250 AT4G21380 AT4G11170 AT1G29330 AT5G22690…
GO:0016651	F	oxidoreductase activity, acting on NADH or NADPH	21	1564	103	37767	1.5e-09	8.4e-08	AT5G08530 AT2G13560 AT4G30210 AT5G47890 AT2G02050 AT5G54500 AT5G18800 AT5G52840 AT4G02580 AT1G48030 AT5G11670 AT2G29990 AT5G47910 AT1G64060 AT2G20800 AT5G03630 AT3G09940 AT3G03100 AT4G36220 AT4G00570 AT5G67590
GO:0000166	F	nucleotide binding	154	1564	2267	37767	1.1e-08	6e-07	AT4G11470 AT3G04210 AT5G44870 AT5G61560 AT5G24430 AT1G70740 AT3G45620 AT3G28540 AT1G28390 AT3G09830 AT1G67470 AT3G59350 AT1G17600 AT2G17220 AT1G61610 AT4G10390 AT4G01010 AT4G23260 AT1G26380 AT4G11170 AT5G44390 AT5G15730 AT5G66900 AT2G20420 AT4G30600 AT1G26390 AT5G45840 AT1G74330 AT4G17720 AT2G19130 AT3G50950 AT5G47070 AT5G25440 AT3G55450 AT2G04450 AT5G41550 AT1G11330 AT4G24970 AT4G39890 AT1G61370…
GO:0005516	F	calmodulin binding	31	1564	231	37767	1.3e-08	6.4e-07	AT3G52870 AT3G63380 AT2G46440 AT1G01340 AT2G39200 AT4G01010 AT2G17480 AT1G27770 AT3G21070 AT4G37640 AT5G26920 AT3G57330 AT4G31550 AT1G73805 AT2G23320 AT2G38540 AT2G22300 AT1G13210 AT2G02010 AT5G48570 AT2G41010 AT4G33050 AT3G17700 AT2G26190 AT2G24570 AT1G11310 AT4G31000 AT1G61560 AT2G15760 AT5G62570 AT3G59690
GO:0005215	F	transporter activity	109	1564	1477	37767	2.1e-08	1e-06	AT5G46050 AT5G45380 AT4G21120 AT4G30190 AT4G28390 AT2G38290 AT4G21680 AT5G61520 AT1G14360 AT4G37640 AT1G01340 AT2G17500 AT2G39350 AT4G11150 AT2G47000 AT4G36670 AT5G61310 AT3G60540 AT4G05110 AT4G19030 AT2G02810 AT5G54860 AT5G08680 AT5G67330 AT2G36380 AT3G13320 AT1G05300 AT5G05370 AT2G29110 AT5G17020 AT2G46440 AT5G25050 AT1G27770 AT1G23090 AT1G58340 AT3G15640 AT5G13740 AT2G04070 AT4G39030 AT5G27520…
GO:0022857	F	transmembrane transporter activity	88	1564	1128	37767	3.8e-08	1.8e-06	AT5G45380 AT4G21120 AT4G30190 AT4G28390 AT2G38290 AT1G14360 AT4G37640 AT1G01340 AT2G17500 AT2G39350 AT4G11150 AT4G36670 AT5G61310 AT4G05110 AT4G19030 AT2G02810 AT5G08680 AT5G67330 AT2G36380 AT3G13320 AT1G05300 AT5G05370 AT2G29110 AT2G23150 AT1G27770 AT1G23090 AT3G15640 AT5G13740 AT2G04070 AT4G39030 AT5G27520 AT5G47560 AT2G42210 AT3G17700 AT3G47780 AT3G45060 AT5G50200 AT1G71140 AT5G48410 AT2G04040…
GO:0004364	F	glutathione transferase activity	14	1564	57	37767	6.5e-08	2.8e-06	AT1G10370 AT2G29440 AT2G02390 AT2G29470 AT2G29460 AT3G09270 AT1G27130 AT2G29420 AT1G17170 AT1G69930 AT1G17190 AT5G17220 AT1G74590 AT1G02930
GO:0016655	F	oxidoreductase activity, acting on NADH or NADPH, quinone or similar compound as acceptor	10	1564	27	37767	6.7e-08	2.8e-06	AT5G08530 AT5G47890 AT2G02050 AT5G54500 AT4G02580 AT5G67590 AT5G03630 AT3G09940 AT3G03100 AT5G18800
GO:0016829	F	lyase activity	44	1564	430	37767	6.7e-08	2.8e-06	AT2G47510 AT5G26030 AT1G01480 AT1G74020 AT4G11280 AT2G05710 AT3G44320 AT3G54640 AT5G42650 AT2G30770 AT2G37040 AT3G51430 AT5G57890 AT5G48900 AT1G08630 AT2G04400 AT5G14740 AT5G17380 AT3G51440 AT1G61120 AT1G74010 AT5G64300 AT5G38530 AT5G50950 AT1G48820 AT5G22630 AT5G22300 AT3G44720 AT2G28210 AT1G04680 AT3G27400 AT3G26830 AT5G54960 AT2G16500 AT5G57190 AT4G26970 AT1G80160 AT4G23600 AT1G23730 AT3G51450…
GO:0005515	F	protein binding	186	1564	2944	37767	7.5e-08	3e-06	AT5G06870 AT4G26090 AT2G34930 AT5G44870 AT3G45620 AT2G32680 AT3G13380 AT3G44400 AT1G76790 AT1G69270 AT4G37640 AT1G01340 AT1G21120 AT4G11170 AT5G39610 AT4G34210 AT1G19180 AT5G66900 AT5G12940 AT4G23810 AT3G13310 AT5G06860 AT5G45840 AT2G02010 AT4G03450 AT5G48655 AT5G36930 AT4G11370 AT5G55170 AT5G41550 AT4G04220 AT5G24590 AT5G27420 AT5G61010 AT1G63840 AT3G52400 AT5G54490 AT1G35710 AT5G10380 AT4G19660…
GO:0009055	F	electron carrier activity	34	1564	294	37767	1.1e-07	4.3e-06	AT5G05340 AT5G40650 AT5G18600 AT4G20860 AT5G44380 AT5G19890 AT1G49570 AT2G34810 AT1G72520 AT1G26410 AT1G26380 AT1G30700 AT5G44390 AT3G03100 AT4G20830 AT4G37530 AT5G39580 AT4G08780 AT3G57070 AT4G10040 AT1G22840 AT5G64100 AT1G26390 AT2G37130 AT1G26420 AT4G08770 AT4G33420 AT4G36430 AT4G02580 AT1G14540 AT5G53870 AT3G27380 AT1G03850 AT3G27240
GO:0015075	F	ion transmembrane transporter activity	58	1564	655	37767	1.1e-07	4.3e-06	AT2G47380 AT3G63380 AT5G08670 AT5G05370 AT5G61520 AT3G13320 AT5G45380 AT4G37830 AT4G21120 AT1G05300 AT4G30190 AT3G51860 AT3G57330 AT3G52730 AT2G29110 AT3G47420 AT2G23150 AT4G32470 AT1G59870 AT5G04930 AT1G27770 AT4G37640 AT5G17860 AT2G38290 AT1G23090 AT1G01340 AT1G76520 AT2G17500 AT5G48400 AT1G78900 AT5G13740 AT2G29410 AT3G25610 AT4G11150 AT1G32450 AT4G36670 AT2G46440 AT3G18830 AT3G15640 AT5G26340…
GO:0004713	F	protein tyrosine kinase activity	27	1564	203	37767	1.3e-07	4.6e-06	AT3G17410 AT1G74360 AT5G61560 AT4G23260 AT1G61360 AT1G67470 AT3G59350 AT3G14840 AT2G17220 AT4G23200 AT4G39270 AT5G58540 AT5G45840 AT1G74330 AT3G56050 AT5G25440 AT5G41180 AT5G46080 AT1G11330 AT1G18390 AT1G34420 AT1G61370 AT4G23270 AT1G35710 AT1G66880 AT5G38240 AT2G40270
GO:0004568	F	chitinase activity	9	1564	24	37767	2.7e-07	9.7e-06	AT4G01700 AT2G43590 AT2G43620 AT3G54420 AT2G43570 AT4G19810 AT3G47540 AT1G02360 AT3G12500
GO:0035251	F	UDP-glucosyltransferase activity	17	1564	94	37767	3.3e-07	1.1e-05	AT3G50740 AT5G55120 AT5G03490 AT3G46670 AT1G22400 AT2G15480 AT2G15490 AT4G15490 AT5G20830 AT1G05560 AT1G07260 AT2G36790 AT1G05570 AT1G05620 AT1G05680 AT3G46660 AT2G43820
GO:0005488	F	binding	591	1564	11258	37767	4.4e-07	1.5e-05	AT5G06870 AT3G15352 AT4G11660 AT5G44870 AT5G61560 AT3G45620 AT5G64100 AT1G28390 AT4G23550 AT4G37010 AT1G67470 AT3G59350 AT1G76790 AT1G22810 AT4G10390 AT3G47480 AT4G11170 AT3G15020 AT3G50770 AT1G19180 AT5G15730 AT5G55170 AT5G34930 AT5G48655 AT2G19130 AT3G50950 AT5G46590 AT1G26390 AT4G24970 AT5G27420 AT1G52040 AT3G52400 AT5G10380 AT1G23730 AT1G66370 AT5G63410 AT5G52760 AT3G09830 AT3G05370 AT3G14090…
GO:0022892	F	substrate-specific transporter activity	79	1564	1059	37767	9.4e-07	3.1e-05	AT5G46050 AT3G63380 AT5G08670 AT5G01500 AT5G62600 AT3G13320 AT5G45380 AT4G37830 AT4G39670 AT4G21120 AT1G05300 AT4G30190 AT3G51860 AT3G56200 AT3G57330 AT3G52730 AT2G29110 AT3G47420 AT5G17020 AT4G16370 AT4G32470 AT1G59870 AT2G46440 AT5G61520 AT5G67330 AT5G04930 AT1G27770 AT1G13210 AT4G37640 AT5G17860 AT2G38290 AT1G23090 AT4G12120 AT1G76520 AT2G17500 AT5G48400 AT1G48370 AT1G78900 AT5G13740 AT2G29410…
GO:0005529	F	sugar binding	14	1564	70	37767	9.8e-07	3.1e-05	AT1G11330 AT4G21390 AT5G03700 AT5G18470 AT1G61370 AT5G03350 AT4G28350 AT4G27300 AT2G19130 AT3G16530 AT1G61360 AT1G78820 AT1G61610 AT5G62620
GO:0046527	F	glucosyltransferase activity	20	1564	136	37767	1e-06	3.2e-05	AT3G50740 AT5G55120 AT5G03490 AT3G46670 AT1G22400 AT2G15480 AT4G13410 AT4G15490 AT5G20830 AT1G05560 AT1G07260 AT2G36790 AT1G05620 AT2G15490 AT4G24000 AT1G05680 AT3G46660 AT1G05570 AT2G43820 AT1G55850
GO:0005509	F	calcium ion binding	26	1564	215	37767	1.3e-06	4.1e-05	AT3G47480 AT3G50770 AT5G24430 AT2G33380 AT2G43290 AT4G17615 AT4G37010 AT3G01830 AT4G32060 AT1G76640 AT1G30900 AT2G41090 AT1G21550 AT1G30000 AT1G52410 AT5G49480 AT2G41410 AT4G20110 AT5G42380 AT1G76650 AT5G54490 AT1G66400 AT2G41100 AT1G08450 AT5G39670 AT4G27280
GO:0008194	F	UDP-glycosyltransferase activity	26	1564	219	37767	1.9e-06	5.6e-05	AT5G55120 AT3G46660 AT2G15490 AT5G20830 AT1G05570 AT1G05680 AT4G15260 AT2G30140 AT1G22400 AT5G33290 AT2G43820 AT3G50740 AT5G03490 AT3G46670 AT4G15490 AT2G15480 AT3G50760 AT4G15550 AT2G36790 AT3G53160 AT3G11340 AT3G46690 AT1G05560 AT1G07260 AT1G05620 AT5G12890
GO:0005057	F	receptor signaling protein activity	12	1564	55	37767	2.2e-06	6.3e-05	AT4G01370 AT4G08500 AT4G21380 AT3G21630 AT1G69270 AT2G43790 AT2G13790 AT5G46330 AT4G18250 AT2G48010 AT3G45640 AT1G01560
GO:0022891	F	substrate-specific transmembrane transporter activity	69	1564	908	37767	2.2e-06	6.4e-05	AT2G47380 AT3G63380 AT5G08670 AT5G05370 AT5G61520 AT3G13320 AT5G45380 AT4G37830 AT4G21120 AT1G05300 AT4G30190 AT3G51860 AT3G56200 AT3G57330 AT3G52730 AT2G29110 AT3G47420 AT2G23150 AT4G32470 AT1G59870 AT5G67330 AT5G04930 AT1G27770 AT1G13210 AT4G37640 AT5G17860 AT2G38290 AT1G23090 AT1G01340 AT1G76520 AT2G17500 AT5G48400 AT5G01500 AT1G78900 AT5G13740 AT2G29410 AT3G25610 AT5G40780 AT1G61800 AT1G32450…
GO:0022890	F	inorganic cation transmembrane transporter activity	26	1564	228	37767	4e-06	0.00011	AT2G47380 AT3G63380 AT5G08670 AT3G57330 AT4G37830 AT3G52730 AT4G30190 AT2G23150 AT4G32470 AT1G59870 AT1G27770 AT4G37640 AT2G38290 AT3G15640 AT5G05370 AT2G29410 AT4G11150 AT1G78900 AT5G61310 AT5G47030 AT3G10860 AT1G64170 AT5G08680 AT5G67330 AT4G23700 AT1G22450
GO:0004702	F	receptor signaling protein serine/threonine kinase activity	11	1564	53	37767	9.6e-06	0.00026	AT4G01370 AT4G08500 AT4G21380 AT1G01560 AT1G69270 AT2G43790 AT2G13790 AT5G46330 AT4G18250 AT3G45640 AT2G48010
GO:0016877	F	ligase activity, forming carbon-sulfur bonds	9	1564	35	37767	9.7e-06	0.00026	AT3G21230 AT5G36880 AT1G51680 AT5G27600 AT2G47240 AT5G23250 AT2G20420 AT3G21240 AT5G08300
GO:0008324	F	cation transmembrane transporter activity	43	1564	503	37767	1e-05	0.00026	AT2G47380 AT3G63380 AT5G08670 AT5G61520 AT3G13320 AT5G45380 AT4G37830 AT4G21120 AT1G05300 AT3G51860 AT3G52730 AT4G30190 AT3G47420 AT2G23150 AT4G32470 AT1G59870 AT1G27770 AT4G37640 AT5G17860 AT2G38290 AT3G57330 AT1G76520 AT2G17500 AT1G78900 AT5G13740 AT2G29410 AT4G11150 AT4G36670 AT2G46440 AT3G18830 AT3G15640 AT5G26340 AT5G61310 AT5G47030 AT5G47560 AT3G10860 AT1G64170 AT5G05370 AT4G32650 AT5G08680…
GO:0016836	F	hydro-lyase activity	15	1564	97	37767	1.2e-05	0.0003	AT2G47510 AT5G50950 AT5G42650 AT5G22630 AT4G26970 AT3G44320 AT2G05710 AT3G54640 AT5G22300 AT1G23730 AT5G14740 AT3G44720 AT2G28210 AT4G27070 AT5G38530
GO:0016615	F	malate dehydrogenase activity	7	1564	22	37767	2.1e-05	0.00052	AT2G13560 AT3G47520 AT5G58330 AT1G53240 AT5G11670 AT3G15020 AT4G00570
GO:0004866	F	endopeptidase inhibitor activity	9	1564	39	37767	2.5e-05	0.00061	AT2G26390 AT2G43510 AT2G38870 AT1G72060 AT5G43580 AT2G43520 AT1G73260 AT1G17860 AT1G47710
GO:0051213	F	dioxygenase activity	8	1564	31	37767	2.9e-05	0.0007	AT1G55020 AT4G22880 AT2G33380 AT3G45140 AT2G26400 AT3G14440 AT3G13610 AT1G72520
GO:0022804	F	active transmembrane transporter activity	51	1564	664	37767	3e-05	0.00071	AT3G63380 AT3G56200 AT5G61520 AT3G13320 AT5G45380 AT2G47000 AT5G13490 AT3G51860 AT1G61890 AT4G30190 AT3G47420 AT4G28390 AT2G38290 AT1G59870 AT5G04930 AT1G27770 AT4G37640 AT5G17860 AT2G04050 AT3G57330 AT1G76520 AT2G17500 AT5G13740 AT2G04070 AT2G39350 AT4G39030 AT1G61800 AT4G36670 AT4G35180 AT3G18830 AT3G23550 AT5G26340 AT3G62150 AT1G13210 AT5G40780 AT5G47560 AT3G25610 AT2G42210 AT1G64170 AT4G21120…
GO:0004867	F	serine-type endopeptidase inhibitor activity	7	1564	24	37767	3.9e-05	0.0009	AT2G26390 AT2G43510 AT2G38870 AT1G72060 AT5G43580 AT2G43520 AT1G47710
GO:0016614	F	oxidoreductase activity, acting on CH-OH group of donors	21	1564	188	37767	4.3e-05	0.00097	AT2G13560 AT1G53240 AT1G17745 AT5G19440 AT4G35260 AT5G03290 AT3G47520 AT4G37990 AT5G14700 AT5G58330 AT4G34230 AT4G39230 AT2G29350 AT5G42800 AT5G11670 AT3G15020 AT1G60730 AT1G76470 AT1G09500 AT4G00570 AT5G40760
GO:0020037	F	heme binding	14	1564	97	37767	4.9e-05	0.0011	AT5G05340 AT2G37130 AT4G08770 AT5G39580 AT4G37530 AT5G64100 AT4G08780 AT5G19890 AT4G36430 AT4G33420 AT1G14540 AT1G49570 AT2G46650 AT3G27240
GO:0016835	F	carbon-oxygen lyase activity	19	1564	163	37767	5.4e-05	0.0012	AT2G47510 AT3G44320 AT5G42650 AT5G48900 AT4G26970 AT5G22630 AT2G05710 AT3G54640 AT5G22300 AT1G23730 AT5G14740 AT5G50950 AT1G61120 AT3G44720 AT2G28210 AT1G04680 AT4G27070 AT3G27400 AT5G38530
GO:0043169	F	cation binding	125	1564	2087	37767	6.5e-05	0.0014	AT3G07600 AT3G50770 AT5G24430 AT3G21150 AT2G33380 AT5G64100 AT4G37010 AT2G37430 AT3G53600 AT1G13750 AT3G47480 AT5G52670 AT1G76640 AT1G30900 AT5G05600 AT5G49480 AT5G48655 AT4G11370 AT2G28210 AT4G20110 AT5G04340 AT4G08770 AT1G71040 AT5G27420 AT1G63840 AT1G76650 AT5G08680 AT5G10380 AT1G23730 AT2G43290 AT5G53870 AT3G18290 AT5G39670 AT5G54490 AT5G16980 AT1G77250 AT2G36950 AT2G44790 AT3G46620 AT5G44070…
GO:0043167	F	ion binding	125	1564	2087	37767	6.5e-05	0.0014	AT3G07600 AT3G50770 AT5G24430 AT3G21150 AT2G33380 AT5G64100 AT4G37010 AT2G37430 AT3G53600 AT1G13750 AT3G47480 AT5G52670 AT1G76640 AT1G30900 AT5G05600 AT5G49480 AT5G48655 AT4G11370 AT2G28210 AT4G20110 AT5G04340 AT4G08770 AT1G71040 AT5G27420 AT1G63840 AT1G76650 AT5G08680 AT5G10380 AT1G23730 AT2G43290 AT5G53870 AT3G18290 AT5G39670 AT5G54490 AT5G16980 AT1G77250 AT2G36950 AT2G44790 AT3G46620 AT5G44070…
GO:0016405	F	CoA-ligase activity	7	1564	26	37767	6.9e-05	0.0014	AT3G21230 AT3G21240 AT1G51680 AT5G36880 AT5G23250 AT2G20420 AT5G08300
GO:0030414	F	peptidase inhibitor activity	9	1564	44	37767	6.9e-05	0.0014	AT2G26390 AT2G43510 AT2G38870 AT1G72060 AT5G43580 AT2G43520 AT1G73260 AT1G17860 AT1G47710
GO:0015078	F	hydrogen ion transmembrane transporter activity	17	1564	139	37767	7.2e-05	0.0014	AT2G47380 AT5G08670 AT5G08680 AT5G61310 AT4G37830 AT3G52730 AT5G47030 AT3G15640 AT5G05370 AT4G23700 AT1G78900 AT1G22450 AT4G30190 AT3G10860 AT1G64170 AT4G32470 AT4G11150
GO:0019825	F	oxygen binding	25	1564	255	37767	7.7e-05	0.0015	AT4G31500 AT1G13110 AT2G30750 AT2G30770 AT5G45340 AT2G34500 AT2G24180 AT5G42650 AT4G37310 AT4G31950 AT3G26200 AT3G28740 AT4G37370 AT3G26220 AT5G57220 AT4G15330 AT2G27690 AT4G39950 AT5G52320 AT3G26830 AT3G14620 AT4G37430 AT4G22690 AT5G36220 AT3G26210
GO:0016684	F	oxidoreductase activity, acting on peroxide as acceptor	16	1564	127	37767	8.1e-05	0.0015	AT5G05340 AT2G37130 AT3G49120 AT4G08770 AT5G39580 AT5G64100 AT5G64120 AT4G08780 AT5G19890 AT4G36430 AT4G33420 AT1G14540 AT1G20630 AT1G48130 AT1G49570 AT4G37530
GO:0004601	F	peroxidase activity	16	1564	127	37767	8.1e-05	0.0015	AT5G05340 AT2G37130 AT3G49120 AT4G08770 AT5G39580 AT5G64100 AT5G64120 AT4G08780 AT5G19890 AT4G36430 AT4G33420 AT1G14540 AT1G20630 AT1G48130 AT1G49570 AT4G37530
GO:0008137	F	NADH dehydrogenase (ubiquinone) activity	6	1564	19	37767	8.7e-05	0.0016	AT5G08530 AT2G02050 AT4G02580 AT5G67590 AT3G03100 AT5G18800
GO:0050136	F	NADH dehydrogenase (quinone) activity	6	1564	19	37767	8.7e-05	0.0016	AT5G08530 AT2G02050 AT4G02580 AT5G67590 AT3G03100 AT5G18800
GO:0016878	F	acid-thiol ligase activity	7	1564	27	37767	9e-05	0.0016	AT3G21230 AT3G21240 AT1G51680 AT5G36880 AT5G23250 AT2G20420 AT5G08300
GO:0016616	F	oxidoreductase activity, acting on the CH-OH group of donors, NAD or NADP as acceptor	17	1564	145	37767	0.00012	0.0021	AT1G17745 AT5G19440 AT4G35260 AT5G03290 AT4G37990 AT5G14700 AT5G58330 AT4G34230 AT4G39230 AT2G29350 AT5G11670 AT3G15020 AT1G60730 AT1G76470 AT1G09500 AT5G42800 AT5G40760
GO:0016798	F	hydrolase activity, acting on glycosyl bonds	41	1564	526	37767	0.00012	0.0021	AT4G18340 AT1G02850 AT5G20950 AT3G54420 AT1G55120 AT4G27830 AT1G52400 AT3G47540 AT3G23730 AT4G25810 AT2G19440 AT2G43620 AT2G06850 AT2G31870 AT4G19810 AT1G65610 AT4G01700 AT3G57240 AT5G11920 AT1G02640 AT1G30000 AT3G55430 AT3G57260 AT1G11545 AT1G62660 AT1G02360 AT4G25000 AT2G27500 AT2G26600 AT5G14650 AT4G16260 AT3G12500 AT3G13790 AT3G60120 AT4G30270 AT2G43570 AT2G44490 AT5G34940 AT2G43590 AT3G06500…
GO:0004553	F	hydrolase activity, hydrolyzing O-glycosyl compounds	38	1564	476	37767	0.00013	0.0022	AT4G18340 AT1G02850 AT5G20950 AT3G54420 AT4G27830 AT1G52400 AT3G47540 AT3G23730 AT2G19440 AT1G55120 AT2G43620 AT2G31870 AT4G19810 AT1G65610 AT4G01700 AT3G57240 AT5G11920 AT1G02640 AT1G30000 AT3G55430 AT3G57260 AT1G11545 AT1G62660 AT1G02360 AT4G25000 AT2G27500 AT2G26600 AT5G14650 AT4G16260 AT2G43590 AT3G13790 AT3G60120 AT2G43570 AT2G44490 AT5G34940 AT3G12500 AT3G06500 AT1G61810
GO:0005506	F	iron ion binding	18	1564	161	37767	0.00014	0.0025	AT5G05340 AT5G05600 AT4G08770 AT4G37530 AT5G39580 AT2G37130 AT5G64100 AT4G08780 AT5G19890 AT4G36430 AT4G33420 AT1G14540 AT3G19010 AT3G28480 AT1G49570 AT2G46650 AT1G72520 AT3G27240
GO:0050662	F	coenzyme binding	20	1564	191	37767	0.00016	0.0026	AT2G20360 AT1G26390 AT1G26420 AT3G55410 AT4G20860 AT4G12720 AT5G54500 AT4G20830 AT1G26410 AT1G12200 AT4G02580 AT1G26380 AT4G20460 AT5G44380 AT5G17380 AT1G30700 AT2G34810 AT5G44390 AT2G04450 AT5G65750
GO:0046872	F	metal ion binding	118	1564	1997	37767	0.00016	0.0027	AT3G07600 AT3G50770 AT5G24430 AT3G21150 AT2G33380 AT5G64100 AT4G37010 AT2G37430 AT3G53600 AT1G13750 AT3G47480 AT5G52670 AT1G76640 AT1G30900 AT5G05600 AT5G49480 AT5G48655 AT4G11370 AT2G28210 AT4G20110 AT5G04340 AT4G08770 AT1G71040 AT5G27420 AT1G63840 AT1G76650 AT5G08680 AT5G10380 AT1G23730 AT2G43290 AT5G53870 AT3G18290 AT5G39670 AT5G54490 AT5G16980 AT1G77250 AT2G36950 AT2G44790 AT3G46620 AT5G44070…
GO:0016903	F	oxidoreductase activity, acting on the aldehyde or oxo group of donors	12	1564	84	37767	0.00018	0.003	AT5G20630 AT3G55410 AT1G76470 AT1G24180 AT1G54100 AT1G09940 AT5G50850 AT1G23800 AT1G80820 AT5G14700 AT5G65750 AT5G20960
GO:0003954	F	NADH dehydrogenase activity	8	1564	40	37767	0.00021	0.0033	AT5G08530 AT2G02050 AT2G29990 AT4G02580 AT2G20800 AT3G03100 AT5G18800 AT5G67590
GO:0016758	F	transferase activity, transferring hexosyl groups	29	1564	340	37767	0.00025	0.004	AT5G55120 AT4G13410 AT3G46660 AT2G15490 AT2G15390 AT5G20830 AT1G05570 AT1G05680 AT2G30140 AT3G23730 AT1G22400 AT2G06850 AT2G43820 AT1G55850 AT3G50740 AT5G03490 AT3G46670 AT4G15490 AT2G15480 AT3G50760 AT2G36790 AT4G24000 AT1G11545 AT3G11340 AT1G05560 AT1G07260 AT4G30270 AT1G05620 AT5G62620
GO:0015077	F	monovalent inorganic cation transmembrane transporter activity	17	1564	156	37767	0.00029	0.0046	AT2G47380 AT5G08670 AT5G08680 AT5G61310 AT4G37830 AT3G52730 AT5G47030 AT3G15640 AT5G05370 AT4G23700 AT1G78900 AT1G22450 AT4G30190 AT3G10860 AT1G64170 AT4G32470 AT4G11150
GO:0016679	F	oxidoreductase activity, acting on diphenols and related substances as donors	8	1564	42	37767	0.00029	0.0046	AT1G18140 AT5G05370 AT3G22370 AT1G32350 AT3G10860 AT3G52730 AT4G39830 AT4G32470
GO:0016765	F	transferase activity, transferring alkyl or aryl (other than methyl) groups	17	1564	158	37767	0.00034	0.0052	AT1G10370 AT2G18950 AT2G29440 AT2G02390 AT2G29470 AT2G29460 AT3G09270 AT1G27130 AT2G29420 AT1G17170 AT1G22410 AT1G69930 AT1G17190 AT5G17220 AT4G39980 AT1G74590 AT1G02930
GO:0019199	F	transmembrane receptor protein kinase activity	5	1564	16	37767	0.00037	0.0056	AT3G21630 AT2G13790 AT5G46330 AT4G21380 AT4G18250
GO:0016298	F	lipase activity	17	1564	161	37767	0.00042	0.0063	AT3G52430 AT5G55050 AT5G40990 AT1G53920 AT2G30550 AT4G11850 AT5G14930 AT3G48080 AT5G58670 AT5G24210 AT3G62590 AT3G48090 AT3G14225 AT1G30370 AT1G31550 AT4G11840 AT2G26560
GO:0050660	F	FAD binding	11	1564	79	37767	0.00042	0.0063	AT1G26390 AT1G26420 AT4G20860 AT5G44380 AT4G20830 AT1G26410 AT1G12200 AT1G26380 AT1G30700 AT2G34810 AT5G44390
GO:0016840	F	carbon-nitrogen lyase activity	6	1564	25	37767	0.00046	0.0067	AT3G51430 AT1G74020 AT3G51450 AT3G51440 AT1G74010 AT2G37040
GO:0016757	F	transferase activity, transferring glycosyl groups	40	1564	544	37767	0.00046	0.0067	AT5G55120 AT4G13410 AT3G46660 AT2G15490 AT2G15390 AT5G17990 AT5G20830 AT1G05570 AT1G05680 AT4G15260 AT2G30140 AT3G23730 AT1G22400 AT5G33290 AT5G57500 AT2G06850 AT2G43820 AT1G55850 AT3G50740 AT5G03490 AT3G46670 AT4G15490 AT2G15480 AT3G50760 AT3G09020 AT4G15550 AT2G36790 AT4G19460 AT4G24000 AT3G53160 AT3G11340 AT1G11545 AT3G46690 AT1G05560 AT1G07260 AT2G41640 AT4G30270 AT1G05620 AT5G12890 AT5G62620
GO:0016844	F	strictosidine synthase activity	5	1564	17	37767	0.0005	0.0071	AT1G74010 AT3G51450 AT3G51440 AT1G74020 AT3G51430
GO:0016843	F	amine-lyase activity	5	1564	17	37767	0.0005	0.0071	AT1G74010 AT3G51450 AT3G51440 AT1G74020 AT3G51430
GO:0016209	F	antioxidant activity	16	1564	150	37767	0.00055	0.0077	AT5G05340 AT2G37130 AT3G49120 AT4G08770 AT5G39580 AT5G64100 AT5G64120 AT4G08780 AT5G19890 AT4G36430 AT4G33420 AT1G14540 AT1G20630 AT1G48130 AT1G49570 AT4G37530
GO:0080043	F	quercetin 3-O-glucosyltransferase activity	6	1564	26	37767	0.00057	0.0079	AT3G46670 AT3G46660 AT2G15480 AT2G15490 AT1G07260 AT2G36790
GO:0042626	F	ATPase activity, coupled to transmembrane movement of substances	18	1564	181	37767	0.0006	0.0081	AT3G63380 AT3G25610 AT5G04930 AT1G27770 AT4G37640 AT4G11150 AT3G57330 AT3G13100 AT3G62150 AT1G13210 AT4G30190 AT2G36380 AT2G47800 AT2G39350 AT3G47780 AT1G15520 AT2G47000 AT1G59870
GO:0043492	F	ATPase activity, coupled to movement of substances	18	1564	181	37767	0.0006	0.0081	AT3G63380 AT3G25610 AT5G04930 AT1G27770 AT4G37640 AT4G11150 AT3G57330 AT3G13100 AT3G62150 AT1G13210 AT4G30190 AT2G36380 AT2G47800 AT2G39350 AT3G47780 AT1G15520 AT2G47000 AT1G59870
GO:0016705	F	oxidoreductase activity, acting on paired donors, with incorporation or reduction of molecular oxygen	19	1564	198	37767	0.00067	0.0088	AT4G31500 AT3G28480 AT1G06620 AT2G36690 AT1G14120 AT4G22880 AT5G45340 AT3G06300 AT2G27690 AT1G12200 AT1G48130 AT2G30490 AT1G02400 AT3G19010 AT4G10500 AT5G24530 AT3G13610 AT1G62570 AT2G34500
GO:0030247	F	polysaccharide binding	5	1564	18	37767	0.00067	0.0088	AT2G43570 AT2G26400 AT2G43590 AT2G43620 AT3G04720
GO:0001871	F	pattern binding	5	1564	18	37767	0.00067	0.0088	AT2G43570 AT2G26400 AT2G43590 AT2G43620 AT3G04720
GO:0016820	F	hydrolase activity, acting on acid anhydrides, catalyzing transmembrane movement of substances	18	1564	183	37767	0.00068	0.0088	AT3G63380 AT3G25610 AT5G04930 AT1G27770 AT4G37640 AT4G11150 AT3G57330 AT3G13100 AT3G62150 AT1G13210 AT4G30190 AT2G36380 AT2G47800 AT2G39350 AT3G47780 AT1G15520 AT2G47000 AT1G59870
GO:0015291	F	secondary active transmembrane transporter activity	28	1564	345	37767	0.00069	0.0089	AT5G61520 AT3G13320 AT5G45380 AT5G13490 AT3G51860 AT1G61890 AT3G47420 AT4G28390 AT2G38290 AT2G17500 AT5G17860 AT2G04050 AT1G76520 AT5G13740 AT2G04070 AT4G39030 AT1G61800 AT4G36670 AT3G18830 AT3G23550 AT5G26340 AT5G47560 AT1G64170 AT1G66760 AT1G71140 AT4G23700 AT1G66780 AT2G04040
GO:0015297	F	antiporter activity	17	1564	170	37767	0.00079	0.01	AT1G66760 AT3G23550 AT3G13320 AT1G66780 AT1G71140 AT5G17860 AT5G13490 AT2G04050 AT3G51860 AT4G23700 AT1G61890 AT2G04070 AT1G64170 AT4G28390 AT4G39030 AT1G61800 AT2G04040
GO:0016702	F	oxidoreductase activity, acting on single donors with incorporation of molecular oxygen, incorporation of two atoms of oxygen	6	1564	28	37767	0.00087	0.011	AT1G55020 AT2G33380 AT3G45140 AT2G26400 AT3G14440 AT1G72520
GO:0015662	F	ATPase activity, coupled to transmembrane movement of ions, phosphorylative mechanism	8	1564	49	37767	0.00086	0.011	AT3G63380 AT5G04930 AT1G27770 AT4G37640 AT3G57330 AT1G13210 AT4G30190 AT3G25610
GO:0015238	F	drug transmembrane transporter activity	10	1564	74	37767	0.00096	0.012	AT2G47000 AT3G23550 AT1G71140 AT2G04050 AT1G61890 AT2G04070 AT1G66780 AT4G39030 AT1G66760 AT2G04040
GO:0004806	F	triglyceride lipase activity	8	1564	53	37767	0.0015	0.018	AT3G52430 AT5G14930 AT2G30550 AT5G24210 AT3G62590 AT3G48090 AT3G48080 AT1G30370
GO:0016787	F	hydrolase activity	182	1564	3468	37767	0.0015	0.018	AT5G53050 AT5G10300 AT5G24430 AT5G58120 AT4G27830 AT4G30190 AT3G44400 AT2G32150 AT4G25810 AT1G13750 AT1G78210 AT5G14930 AT4G01610 AT4G37640 AT3G48090 AT5G10760 AT2G39350 AT4G11150 AT2G47000 AT4G30600 AT3G44320 AT5G59490 AT3G28580 AT1G66970 AT3G57260 AT4G39955 AT2G26740 AT4G15100 AT2G04450 AT5G41550 AT3G51330 AT5G11920 AT4G33920 AT3G13790 AT2G45220 AT1G51780 AT3G48080 AT5G60360 AT1G54020 AT2G36380…
GO:0004683	F	calmodulin-dependent protein kinase activity	7	1564	42	37767	0.0016	0.019	AT1G18890 AT2G17290 AT4G09570 AT5G04870 AT3G20410 AT1G76040 AT4G35310
GO:0048037	F	cofactor binding	21	1564	246	37767	0.0016	0.019	AT2G20360 AT1G26390 AT1G26420 AT3G55410 AT4G20860 AT4G12720 AT5G54500 AT4G20830 AT1G26410 AT1G12200 AT4G02580 AT1G26380 AT4G20460 AT5G44380 AT5G17380 AT1G30700 AT2G34810 AT5G44390 AT2G04450 AT5G65750 AT5G38530
GO:0046906	F	tetrapyrrole binding	14	1564	136	37767	0.0017	0.019	AT5G05340 AT2G37130 AT4G08770 AT5G39580 AT4G37530 AT5G64100 AT4G08780 AT5G19890 AT4G36430 AT4G33420 AT1G14540 AT1G49570 AT2G46650 AT3G27240
GO:0016706	F	oxidoreductase activity, acting on paired donors, with incorporation or reduction of molecular oxygen, 2-oxoglutarate as one donor, and incorporation of one atom each of oxygen into both donors	11	1564	95	37767	0.002	0.023	AT3G28480 AT4G22880 AT1G06620 AT2G36690 AT1G14120 AT3G06300 AT1G02400 AT3G19010 AT4G10500 AT5G24530 AT3G13610
GO:0042625	F	ATPase activity, coupled to transmembrane movement of ions	9	1564	68	37767	0.002	0.023	AT3G63380 AT5G04930 AT1G27770 AT4G37640 AT3G57330 AT1G13210 AT4G30190 AT3G25610 AT4G11150
GO:0008171	F	O-methyltransferase activity	7	1564	45	37767	0.0024	0.027	AT3G44860 AT1G76790 AT1G33030 AT1G21100 AT1G21130 AT1G21120 AT1G67980
GO:0016676	F	oxidoreductase activity, acting on heme group of donors, oxygen as acceptor	5	1564	24	37767	0.0027	0.03	AT5G61310 AT4G37830 AT2G47380 AT3G15640 AT1G22450
GO:0016675	F	oxidoreductase activity, acting on heme group of donors	5	1564	24	37767	0.0027	0.03	AT5G61310 AT4G37830 AT2G47380 AT3G15640 AT1G22450
GO:0015002	F	heme-copper terminal oxidase activity	5	1564	24	37767	0.0027	0.03	AT5G61310 AT4G37830 AT2G47380 AT3G15640 AT1G22450
GO:0004129	F	cytochrome-c oxidase activity	5	1564	24	37767	0.0027	0.03	AT5G61310 AT4G37830 AT2G47380 AT3G15640 AT1G22450
GO:0016701	F	oxidoreductase activity, acting on single donors with incorporation of molecular oxygen	6	1564	36	37767	0.0034	0.037	AT1G55020 AT2G33380 AT3G45140 AT2G26400 AT3G14440 AT1G72520
GO:0015082	F	di-, tri-valent inorganic cation transmembrane transporter activity	8	1564	65	37767	0.0054	0.058	AT3G63380 AT3G57330 AT1G27770 AT4G37640 AT5G67330 AT2G29410 AT2G23150 AT1G59870
GO:0004857	F	enzyme inhibitor activity	15	1564	173	37767	0.006	0.064	AT2G26390 AT2G43510 AT2G26440 AT3G47380 AT2G38870 AT1G72060 AT5G43580 AT2G43520 AT2G45220 AT1G73260 AT3G43270 AT1G17860 AT5G56260 AT2G47550 AT1G47710
GO:0016638	F	oxidoreductase activity, acting on the CH-NH2 group of donors	7	1564	53	37767	0.0061	0.065	AT5G43450 AT4G29740 AT1G62380 AT5G07440 AT1G05010 AT2G19590 AT5G53460
GO:0015405	F	P-P-bond-hydrolysis-driven transmembrane transporter activity	19	1564	243	37767	0.0067	0.07	AT3G63380 AT3G25610 AT4G30190 AT5G04930 AT1G27770 AT4G37640 AT4G11150 AT3G57330 AT3G13100 AT3G62150 AT1G13210 AT2G42210 AT2G36380 AT2G47800 AT2G39350 AT3G47780 AT1G15520 AT2G47000 AT1G59870
GO:0015399	F	primary active transmembrane transporter activity	19	1564	244	37767	0.007	0.072	AT3G63380 AT3G25610 AT4G30190 AT5G04930 AT1G27770 AT4G37640 AT4G11150 AT3G57330 AT3G13100 AT3G62150 AT1G13210 AT2G42210 AT2G36380 AT2G47800 AT2G39350 AT3G47780 AT1G15520 AT2G47000 AT1G59870
GO:0005507	F	copper ion binding	11	1564	113	37767	0.0075	0.077	AT1G71040 AT1G53030 AT2G44790 AT4G26970 AT5G08680 AT5G44070 AT5G53870 AT3G15352 AT4G39830 AT2G02850 AT5G20230
GO:0004091	F	carboxylesterase activity	26	1564	378	37767	0.0092	0.094	AT2G30550 AT3G62590 AT1G30370 AT1G29670 AT3G43270 AT4G02330 AT4G16690 AT3G52430 AT5G40990 AT3G48690 AT5G14930 AT3G48090 AT3G14225 AT1G19670 AT5G55050 AT3G47380 AT5G03610 AT3G09410 AT1G31550 AT1G53920 AT2G26440 AT5G24210 AT2G45220 AT3G48080 AT1G54020 AT2G47550
GO:0004712	F	protein serine/threonine/tyrosine kinase activity	8	1564	73	37767	0.011	0.11	AT1G51660 AT5G03730 AT4G26070 AT1G73500 AT5G01850 AT4G18950 AT4G29810 AT3G46930
GO:0003700	F	transcription factor activity	113	1564	2173	37767	0.011	0.11	AT5G49520 AT1G64380 AT1G80840 AT3G49530 AT4G11660 AT1G51700 AT3G21150 AT4G37790 AT3G46600 AT4G23550 AT1G56160 AT5G46350 AT2G37430 AT3G53600 AT1G22810 AT2G40740 AT5G39610 AT4G23810 AT2G31180 AT5G22570 AT3G47640 AT3G56980 AT3G17609 AT5G46590 AT2G43000 AT5G04340 AT5G46910 AT4G17230 AT2G24570 AT1G66370 AT3G50260 AT5G43170 AT1G18570 AT1G02220 AT5G15130 AT3G10500 AT2G33710 AT1G06160 AT5G66730 AT4G27410…
GO:0016782	F	transferase activity, transferring sulfur-containing groups	5	1564	35	37767	0.014	0.14	AT5G66170 AT1G74100 AT1G18590 AT5G07010 AT2G03760
GO:0005216	F	ion channel activity	10	1564	108	37767	0.015	0.14	AT2G29120 AT4G32650 AT2G46440 AT1G01340 AT1G27770 AT4G01010 AT5G48410 AT5G48400 AT2G29110 AT3G17700
GO:0016627	F	oxidoreductase activity, acting on the CH-CH group of donors	9	1564	93	37767	0.015	0.15	AT5G40650 AT2G06050 AT2G18450 AT5G66760 AT4G16760 AT3G27380 AT5G34930 AT3G17810 AT5G16970
GO:0016564	F	transcription repressor activity	7	1564	63	37767	0.015	0.15	AT1G27730 AT4G11660 AT5G67450 AT3G56400 AT4G36990 AT3G15210 AT5G43170
GO:0030551	F	cyclic nucleotide binding	5	1564	36	37767	0.016	0.15	AT1G01340 AT3G17700 AT2G46440 AT4G32650 AT4G01010
GO:0016462	F	pyrophosphatase activity	48	1564	832	37767	0.016	0.15	AT3G63380 AT4G12720 AT5G57480 AT5G46520 AT1G66090 AT3G44630 AT3G50930 AT4G30190 AT3G44400 AT1G11100 AT1G59870 AT2G04450 AT1G43910 AT5G04930 AT1G27770 AT5G41740 AT4G37640 AT1G61140 AT3G57330 AT4G11170 AT1G56540 AT1G13210 AT3G28600 AT5G40910 AT2G39350 AT1G15520 AT2G47000 AT4G30600 AT3G04220 AT5G17760 AT3G62150 AT3G28580 AT3G53230 AT3G25610 AT5G51070 AT3G47780 AT5G41550 AT3G28540 AT5G58120 AT1G69550…
GO:0017111	F	nucleoside-triphosphatase activity	46	1564	792	37767	0.016	0.15	AT3G63380 AT5G57480 AT5G46520 AT1G66090 AT3G44630 AT3G50930 AT4G30190 AT3G44400 AT1G11100 AT1G59870 AT1G43910 AT5G04930 AT1G27770 AT5G41740 AT4G37640 AT1G61140 AT3G57330 AT4G11170 AT1G56540 AT1G13210 AT3G28600 AT5G40910 AT2G39350 AT1G15520 AT2G47000 AT4G30600 AT3G04220 AT5G17760 AT3G62150 AT3G28580 AT3G53230 AT3G25610 AT5G51070 AT3G47780 AT5G41550 AT3G28540 AT5G58120 AT1G69550 AT4G11150 AT3G28510…
GO:0015103	F	inorganic anion transmembrane transporter activity	8	1564	79	37767	0.017	0.16	AT5G50200 AT1G23090 AT5G67330 AT1G32450 AT2G29410 AT2G23150 AT4G19030 AT3G45060
GO:0004497	F	monooxygenase activity	11	1564	127	37767	0.017	0.16	AT4G31500 AT1G19250 AT4G38540 AT4G36220 AT5G45340 AT1G12200 AT2G27690 AT2G29720 AT2G30490 AT1G62570 AT3G26830
GO:0016818	F	hydrolase activity, acting on acid anhydrides, in phosphorus-containing anhydrides	48	1564	837	37767	0.017	0.16	AT3G63380 AT4G12720 AT5G57480 AT5G46520 AT1G66090 AT3G44630 AT3G50930 AT4G30190 AT3G44400 AT1G11100 AT1G59870 AT2G04450 AT1G43910 AT5G04930 AT1G27770 AT5G41740 AT4G37640 AT1G61140 AT3G57330 AT4G11170 AT1G56540 AT1G13210 AT3G28600 AT5G40910 AT2G39350 AT1G15520 AT2G47000 AT4G30600 AT3G04220 AT5G17760 AT3G62150 AT3G28580 AT3G53230 AT3G25610 AT5G51070 AT3G47780 AT5G41550 AT3G28540 AT5G58120 AT1G69550…
GO:0015276	F	ligand-gated ion channel activity	5	1564	37	37767	0.018	0.16	AT2G29110 AT2G29120 AT5G48410 AT5G48400 AT4G32650
GO:0022834	F	ligand-gated channel activity	5	1564	37	37767	0.018	0.16	AT2G29110 AT2G29120 AT5G48410 AT5G48400 AT4G32650
GO:0016817	F	hydrolase activity, acting on acid anhydrides	48	1564	839	37767	0.018	0.16	AT3G63380 AT4G12720 AT5G57480 AT5G46520 AT1G66090 AT3G44630 AT3G50930 AT4G30190 AT3G44400 AT1G11100 AT1G59870 AT2G04450 AT1G43910 AT5G04930 AT1G27770 AT5G41740 AT4G37640 AT1G61140 AT3G57330 AT4G11170 AT1G56540 AT1G13210 AT3G28600 AT5G40910 AT2G39350 AT1G15520 AT2G47000 AT4G30600 AT3G04220 AT5G17760 AT3G62150 AT3G28580 AT3G53230 AT3G25610 AT5G51070 AT3G47780 AT5G41550 AT3G28540 AT5G58120 AT1G69550…
GO:0019829	F	cation-transporting ATPase activity	5	1564	38	37767	0.02	0.18	AT3G57330 AT1G27770 AT3G63380 AT4G37640 AT4G11150
GO:0016641	F	oxidoreductase activity, acting on the CH-NH2 group of donors, oxygen as acceptor	5	1564	39	37767	0.022	0.2	AT4G29740 AT5G43450 AT2G19590 AT1G05010 AT1G62380
GO:0016620	F	oxidoreductase activity, acting on the aldehyde or oxo group of donors, NAD or NADP as acceptor	6	1564	56	37767	0.028	0.25	AT1G76470 AT1G54100 AT1G09940 AT5G14700 AT1G23800 AT1G80820
GO:0016746	F	transferase activity, transferring acyl groups	21	1564	324	37767	0.031	0.27	AT4G26910 AT2G32030 AT5G55070 AT3G13930 AT2G39030 AT2G44350 AT4G29210 AT4G39640 AT2G39980 AT2G28630 AT5G44070 AT5G01210 AT4G34250 AT5G13930 AT1G55920 AT5G23250 AT1G54570 AT3G50280 AT5G39050 AT2G32020 AT5G42830
GO:0016874	F	ligase activity	33	1564	564	37767	0.033	0.29	AT5G61560 AT2G47240 AT1G29340 AT2G23170 AT5G23250 AT2G42360 AT5G08300 AT3G21230 AT5G67340 AT5G36880 AT3G52450 AT4G27260 AT5G09800 AT1G76390 AT4G34210 AT2G20420 AT3G53180 AT5G01830 AT2G35000 AT3G47340 AT3G21240 AT1G08050 AT5G27420 AT1G17960 AT1G51680 AT5G27600 AT2G35930 AT5G10380 AT5G37490 AT4G36550 AT2G28830 AT5G16570 AT3G18710
GO:0016830	F	carbon-carbon lyase activity	11	1564	141	37767	0.034	0.29	AT5G05730 AT5G54960 AT5G57890 AT2G16500 AT5G57190 AT1G08630 AT2G04400 AT5G17380 AT4G34710 AT5G64300 AT3G26830
GO:0016563	F	transcription activator activity	13	1564	177	37767	0.034	0.29	AT4G23810 AT5G47230 AT4G17500 AT1G32640 AT5G24590 AT2G46680 AT5G47220 AT1G06160 AT4G27410 AT3G23240 AT5G05410 AT5G61600 AT1G64280
GO:0016667	F	oxidoreductase activity, acting on sulfur group of donors	9	1564	109	37767	0.038	0.32	AT4G21830 AT5G18600 AT5G38900 AT1G45145 AT4G05020 AT3G57070 AT4G04610 AT1G48030 AT1G03850
GO:0008483	F	transaminase activity	7	1564	76	37767	0.038	0.33	AT4G35630 AT2G24850 AT4G23600 AT2G22250 AT5G11520 AT1G10070 AT5G46180
GO:0016769	F	transferase activity, transferring nitrogenous groups	7	1564	77	37767	0.041	0.34	AT4G35630 AT2G24850 AT4G23600 AT2G22250 AT5G11520 AT1G10070 AT5G46180
GO:0022838	F	substrate-specific channel activity	11	1564	151	37767	0.051	0.43	AT2G29120 AT4G32650 AT2G46440 AT1G01340 AT1G27770 AT4G01010 AT5G48410 AT5G48400 AT2G29110 AT3G17700 AT4G19030
GO:0016831	F	carboxy-lyase activity	7	1564	81	37767	0.051	0.43	AT5G54960 AT2G16500 AT5G57190 AT2G04400 AT5G17380 AT4G34710 AT3G26830
GO:0015267	F	channel activity	11	1564	152	37767	0.053	0.43	AT2G29120 AT4G32650 AT2G46440 AT1G01340 AT1G27770 AT4G01010 AT5G48410 AT5G48400 AT2G29110 AT3G17700 AT4G19030
GO:0022803	F	passive transmembrane transporter activity	11	1564	152	37767	0.053	0.43	AT2G29120 AT4G32650 AT2G46440 AT1G01340 AT1G27770 AT4G01010 AT5G48410 AT5G48400 AT2G29110 AT3G17700 AT4G19030
GO:0030528	F	transcription regulator activity	117	1564	2417	37767	0.056	0.45	AT5G49520 AT1G64380 AT1G80840 AT3G49530 AT4G11660 AT1G51700 AT4G25210 AT4G37790 AT3G46600 AT4G23550 AT1G56160 AT5G46350 AT2G37430 AT3G53600 AT1G22810 AT2G40740 AT5G39610 AT4G23810 AT2G31180 AT5G22570 AT3G21150 AT3G47640 AT3G56980 AT3G17609 AT5G46590 AT2G43000 AT5G04340 AT5G46910 AT4G17230 AT2G24570 AT1G66370 AT3G50260 AT5G43170 AT1G18570 AT2G25000 AT5G15130 AT3G10500 AT2G33710 AT1G06160 AT5G66730…
GO:0008509	F	anion transmembrane transporter activity	9	1564	120	37767	0.063	0.51	AT5G50200 AT5G47560 AT1G23090 AT5G67330 AT1G32450 AT2G29410 AT2G23150 AT4G19030 AT3G45060
GO:0015300	F	solute:solute antiporter activity	7	1564	90	37767	0.08	0.65	AT3G13320 AT5G17860 AT5G13490 AT3G51860 AT4G23700 AT1G64170 AT4G28390
GO:0016709	F	oxidoreductase activity, acting on paired donors, with incorporation or reduction of molecular oxygen, NADH or NADPH as one donor, and incorporation of one atom of oxygen	5	1564	56	37767	0.082	0.66	AT4G31500 AT1G62570 AT5G45340 AT1G12200 AT2G30490
GO:0016853	F	isomerase activity	16	1564	265	37767	0.088	0.69	AT5G48570 AT1G74710 AT1G77510 AT4G15340 AT1G78955 AT4G25900 AT5G36150 AT4G20460 AT1G30620 AT3G25760 AT3G25780 AT1G69370 AT3G55120 AT4G17070 AT1G04980 AT4G25340
GO:0004190	F	aspartic-type endopeptidase activity	7	1564	92	37767	0.088	0.69	AT1G44130 AT2G39710 AT1G03220 AT3G51330 AT5G10760 AT5G19110 AT5G48430
GO:0070001	F	aspartic-type peptidase activity	7	1564	92	37767	0.088	0.69	AT1G44130 AT2G39710 AT1G03220 AT3G51330 AT5G10760 AT5G19110 AT5G48430
GO:0046873	F	metal ion transmembrane transporter activity	11	1564	168	37767	0.092	0.72	AT2G46440 AT3G63380 AT4G32650 AT3G57330 AT1G27770 AT4G37640 AT1G05300 AT5G67330 AT2G29410 AT2G23150 AT1G59870
GO:0016810	F	hydrolase activity, acting on carbon-nitrogen (but not peptide) bonds	9	1564	131	37767	0.096	0.74	AT1G44350 AT3G02875 AT3G44320 AT3G44750 AT5G22300 AT1G51780 AT2G44420 AT5G64300 AT5G22650
GO:0016846	F	carbon-sulfur lyase activity	5	1564	59	37767	0.097	0.75	AT1G01480 AT4G11280 AT1G80160 AT4G23600 AT4G26200
GO:0015036	F	disulfide oxidoreductase activity	5	1564	60	37767	0.1	0.79	AT5G18600 AT4G05020 AT3G57070 AT5G38900 AT1G03850
GO:0005342	F	organic acid transmembrane transporter activity	6	1564	78	37767	0.1	0.79	AT4G35180 AT3G56200 AT5G47560 AT4G21120 AT4G24570 AT5G40780
GO:0046943	F	carboxylic acid transmembrane transporter activity	6	1564	78	37767	0.1	0.79	AT4G35180 AT3G56200 AT5G47560 AT4G21120 AT4G24570 AT5G40780
GO:0016887	F	ATPase activity	26	1564	482	37767	0.11	0.81	AT3G63380 AT3G57330 AT2G47000 AT3G28540 AT3G50930 AT4G30190 AT1G43910 AT1G59870 AT5G04930 AT1G27770 AT4G37640 AT5G57480 AT1G13210 AT3G25610 AT2G39350 AT4G11150 AT3G62150 AT3G28580 AT5G51070 AT3G47780 AT3G28600 AT1G15520 AT3G28510 AT3G13100 AT2G36380 AT2G47800
GO:0016866	F	intramolecular transferase activity	5	1564	61	37767	0.11	0.81	AT4G15340 AT1G69370 AT1G74710 AT1G78955 AT5G36150
GO:0016879	F	ligase activity, forming carbon-nitrogen bonds	23	1564	423	37767	0.12	0.86	AT5G61560 AT1G29340 AT2G23170 AT2G42360 AT5G67340 AT3G52450 AT4G36550 AT5G09800 AT1G76390 AT4G34210 AT3G53180 AT5G01830 AT2G35000 AT3G47340 AT1G08050 AT5G27420 AT2G35930 AT5G10380 AT5G37490 AT4G27260 AT2G28830 AT5G16570 AT3G18710
GO:0045735	F	nutrient reservoir activity	5	1564	63	37767	0.12	0.89	AT2G26560 AT5G44120 AT4G24350 AT5G54740 AT4G36700
GO:0016881	F	acid-amino acid ligase activity	20	1564	364	37767	0.13	0.92	AT5G67340 AT5G27420 AT3G52450 AT5G61560 AT2G35930 AT4G27260 AT5G10380 AT2G23170 AT5G37490 AT4G36550 AT5G09800 AT2G28830 AT1G76390 AT5G01830 AT4G34210 AT2G42360 AT1G29340 AT1G08050 AT2G35000 AT3G18710
GO:0004842	F	ubiquitin-protein ligase activity	18	1564	324	37767	0.13	0.95	AT5G67340 AT5G27420 AT3G52450 AT5G61560 AT2G35930 AT5G10380 AT5G37490 AT4G36550 AT5G09800 AT2G28830 AT1G76390 AT5G01830 AT4G34210 AT2G42360 AT1G29340 AT1G08050 AT2G35000 AT3G18710
GO:0030599	F	pectinesterase activity	6	1564	144	37767	0.55	1	AT2G26440 AT3G47380 AT2G45220 AT3G43270 AT4G02330 AT2G47550
GO:0015144	F	carbohydrate transmembrane transporter activity	9	1564	156	37767	0.2	1	AT2G02810 AT5G61520 AT5G26340 AT1G14360 AT3G18830 AT5G13740 AT3G47420 AT1G61800 AT4G36670
GO:0008565	F	protein transporter activity	7	1564	159	37767	0.49	1	AT1G76970 AT1G21380 AT5G62600 AT3G60540 AT4G12120 AT2G42210 AT5G17020
GO:0015491	F	cation:cation antiporter activity	5	1564	66	37767	0.14	1	AT3G51860 AT4G23700 AT1G64170 AT5G17860 AT3G13320
GO:0016788	F	hydrolase activity, acting on ester bonds	51	1564	1200	37767	0.45	1	AT1G73010 AT3G17790 AT2G28890 AT5G64000 AT1G66980 AT5G22250 AT5G06750 AT5G24430 AT2G30550 AT3G62590 AT1G30370 AT1G29670 AT3G43270 AT4G02330 AT3G44260 AT4G16690 AT2G26560 AT3G52430 AT5G40990 AT3G48690 AT1G13750 AT5G24780 AT5G14930 AT3G48090 AT3G14225 AT4G11840 AT1G19670 AT5G55050 AT5G59220 AT3G47380 AT1G66970 AT1G22280 AT5G03610 AT3G09410 AT1G31550 AT3G05580 AT4G28400 AT3G04480 AT1G53920 AT2G26440…
GO:0008415	F	acyltransferase activity	9	1564	231	37767	0.62	1	AT2G32030 AT2G39030 AT3G13930 AT5G55070 AT2G28630 AT4G34250 AT1G55920 AT4G26910 AT2G32020
GO:0008289	F	lipid binding	16	1564	323	37767	0.27	1	AT5G61900 AT4G39670 AT4G25940 AT3G22600 AT5G48490 AT5G64080 AT5G02100 AT4G22470 AT4G12490 AT4G12480 AT4G12500 AT5G55450 AT5G54740 AT4G22610 AT4G12470 AT3G61190
GO:0070011	F	peptidase activity, acting on L-amino acid peptides	18	1564	579	37767	0.92	1	AT1G44350 AT1G44130 AT2G39710 AT3G02875 AT1G03220 AT3G49340 AT4G01610 AT1G16420 AT1G24140 AT1G32970 AT1G51780 AT3G51330 AT5G60360 AT5G10760 AT4G15100 AT5G19110 AT5G22860 AT5G48430
GO:0016741	F	transferase activity, transferring one-carbon groups	14	1564	275	37767	0.25	1	AT3G44860 AT3G54150 AT1G21130 AT1G76790 AT2G35160 AT2G41380 AT3G11480 AT1G55450 AT2G31740 AT1G21100 AT1G21120 AT1G33030 AT4G22530 AT1G67980
GO:0016747	F	transferase activity, transferring acyl groups other than amino-acyl groups	16	1564	290	37767	0.15	1	AT5G39050 AT3G13930 AT2G39030 AT5G55070 AT5G13930 AT2G39980 AT2G28630 AT5G01210 AT4G34250 AT2G32030 AT1G55920 AT1G54570 AT3G50280 AT4G26910 AT2G32020 AT5G42830
GO:0051119	F	sugar transmembrane transporter activity	7	1564	139	37767	0.35	1	AT3G18830 AT5G61520 AT5G26340 AT5G13740 AT3G47420 AT1G61800 AT4G36670
GO:0008081	F	phosphoric diester hydrolase activity	5	1564	73	37767	0.19	1	AT4G11850 AT1G66980 AT1G66970 AT5G58670 AT4G11840
GO:0019001	F	guanyl nucleotide binding	5	1564	249	37767	0.98	1	AT4G30600 AT4G18430 AT5G47960 AT4G39890 AT5G54840
GO:0046983	F	protein dimerization activity	8	1564	144	37767	0.25	1	AT4G39400 AT1G76790 AT1G21100 AT4G12720 AT1G21120 AT1G21130 AT4G33430 AT5G39610
GO:0016791	F	phosphatase activity	16	1564	407	37767	0.62	1	AT1G73010 AT3G17790 AT1G34750 AT1G13750 AT5G24780 AT5G64000 AT4G33920 AT5G06750 AT5G24430 AT1G22280 AT5G59220 AT3G02800 AT2G28890 AT3G05580 AT4G28400 AT1G35910
GO:0032561	F	guanyl ribonucleotide binding	5	1564	249	37767	0.98	1	AT4G30600 AT4G18430 AT5G47960 AT4G39890 AT5G54840
GO:0016407	F	acetyltransferase activity	5	1564	91	37767	0.33	1	AT2G32030 AT2G32020 AT3G13930 AT2G39030 AT1G55920
GO:0004175	F	endopeptidase activity	12	1564	257	37767	0.38	1	AT1G44130 AT2G39710 AT1G03220 AT3G49340 AT4G01610 AT1G16420 AT1G24140 AT1G32970 AT3G51330 AT5G10760 AT5G19110 AT5G48430
GO:0015294	F	solute:cation symporter activity	10	1564	163	37767	0.14	1	AT3G18830 AT5G61520 AT5G26340 AT5G45380 AT2G17500 AT5G47560 AT1G76520 AT5G13740 AT3G47420 AT4G36670
GO:0003677	F	DNA binding	120	1564	2892	37767	0.51	1	AT5G49520 AT1G64380 AT1G80840 AT3G49530 AT4G11660 AT1G51700 AT3G21150 AT4G37790 AT3G46600 AT4G23550 AT1G56160 AT5G46350 AT2G37430 AT3G53600 AT1G22810 AT2G40740 AT5G39610 AT4G23810 AT2G31180 AT5G22570 AT3G47640 AT3G56980 AT3G17609 AT5G46590 AT2G43000 AT5G04340 AT5G46910 AT4G17230 AT2G24570 AT1G66370 AT3G50260 AT5G43170 AT1G18570 AT2G25000 AT5G15130 AT1G77250 AT3G10500 AT1G11100 AT2G33710 AT1G06160…
GO:0005351	F	sugar:hydrogen symporter activity	6	1564	126	37767	0.42	1	AT3G18830 AT5G61520 AT5G26340 AT5G13740 AT3G47420 AT4G36670
GO:0008270	F	zinc ion binding	47	1564	1299	37767	0.84	1	AT4G14365 AT3G46620 AT3G21150 AT3G44750 AT1G79380 AT5G67450 AT5G10380 AT4G11360 AT5G24760 AT2G42360 AT1G11100 AT2G37430 AT5G63970 AT2G27660 AT5G59550 AT1G27730 AT1G67800 AT4G15975 AT5G66730 AT1G61140 AT5G59820 AT5G14740 AT1G20823 AT1G64710 AT3G53600 AT1G03370 AT3G52800 AT4G26400 AT4G01350 AT5G48655 AT4G11370 AT2G35000 AT2G28210 AT4G02200 AT5G04340 AT5G27420 AT1G63840 AT4G33940 AT1G23730 AT3G05200…
GO:0003676	F	nucleic acid binding	126	1564	4842	37767	1	1	AT5G49520 AT1G64380 AT1G80840 AT3G49530 AT4G11660 AT1G51700 AT3G21150 AT4G37790 AT3G46600 AT4G23550 AT1G56160 AT5G46350 AT2G37430 AT3G53600 AT1G22810 AT2G40740 AT5G39610 AT4G30600 AT4G23810 AT2G31180 AT5G22570 AT3G47640 AT3G56980 AT3G17609 AT5G46590 AT2G43000 AT5G04340 AT5G46910 AT4G17230 AT2G24570 AT1G31290 AT1G66370 AT3G50260 AT5G43170 AT1G18570 AT2G25000 AT5G15130 AT1G77250 AT3G10500 AT1G11100…
GO:0008168	F	methyltransferase activity	14	1564	273	37767	0.25	1	AT3G44860 AT3G54150 AT1G21130 AT1G76790 AT2G35160 AT2G41380 AT3G11480 AT1G55450 AT2G31740 AT1G21100 AT1G21120 AT1G33030 AT4G22530 AT1G67980
GO:0042623	F	ATPase activity, coupled	18	1564	359	37767	0.24	1	AT3G63380 AT3G25610 AT5G04930 AT1G27770 AT4G37640 AT4G11150 AT3G57330 AT3G13100 AT3G62150 AT1G13210 AT4G30190 AT2G36380 AT2G47800 AT2G39350 AT3G47780 AT1G15520 AT2G47000 AT1G59870
GO:0005525	F	GTP binding	5	1564	249	37767	0.98	1	AT4G30600 AT4G18430 AT5G47960 AT4G39890 AT5G54840
GO:0042578	F	phosphoric ester hydrolase activity	21	1564	481	37767	0.43	1	AT1G73010 AT3G17790 AT1G34750 AT1G13750 AT5G24780 AT5G64000 AT1G66980 AT4G33920 AT5G06750 AT5G24430 AT1G66970 AT5G59220 AT5G58670 AT4G11850 AT3G02800 AT2G28890 AT4G11840 AT3G05580 AT4G28400 AT1G35910 AT1G22280
GO:0008233	F	peptidase activity	19	1564	646	37767	0.95	1	AT1G44350 AT1G44130 AT2G39710 AT3G02875 AT1G03220 AT3G49340 AT4G01610 AT1G16420 AT1G24140 AT1G32970 AT1G51780 AT3G51330 AT5G60360 AT5G10760 AT4G15100 AT5G19110 AT3G15710 AT5G22860 AT5G48430
GO:0022836	F	gated channel activity	5	1564	73	37767	0.19	1	AT2G29110 AT2G29120 AT5G48410 AT5G48400 AT4G32650
GO:0030234	F	enzyme regulator activity	17	1564	367	37767	0.35	1	AT2G26390 AT2G43510 AT2G26440 AT3G47380 AT2G38870 AT1G72060 AT5G43580 AT2G43520 AT1G73500 AT2G45220 AT1G67810 AT1G73260 AT3G43270 AT1G17860 AT5G56260 AT2G47550 AT1G47710
GO:0005402	F	cation:sugar symporter activity	6	1564	126	37767	0.42	1	AT3G18830 AT5G61520 AT5G26340 AT5G13740 AT3G47420 AT4G36670
GO:0019787	F	small conjugating protein ligase activity	18	1564	336	37767	0.16	1	AT5G67340 AT5G27420 AT3G52450 AT5G61560 AT2G35930 AT5G10380 AT5G37490 AT4G36550 AT5G09800 AT2G28830 AT1G76390 AT5G01830 AT4G34210 AT2G42360 AT1G29340 AT1G08050 AT2G35000 AT3G18710
GO:0004722	F	protein serine/threonine phosphatase activity	11	1564	207	37767	0.24	1	AT3G17790 AT1G34750 AT1G13750 AT4G33920 AT5G06750 AT5G24430 AT5G59220 AT2G28890 AT3G05580 AT4G28400 AT1G22280
GO:0004721	F	phosphoprotein phosphatase activity	12	1564	262	37767	0.4	1	AT3G17790 AT1G34750 AT1G13750 AT4G33920 AT5G06750 AT5G24430 AT5G59220 AT3G02800 AT2G28890 AT3G05580 AT4G28400 AT1G22280
GO:0015295	F	solute:hydrogen symporter activity	6	1564	126	37767	0.42	1	AT3G18830 AT5G61520 AT5G26340 AT5G13740 AT3G47420 AT4G36670
GO:0015293	F	symporter activity	10	1564	164	37767	0.15	1	AT3G18830 AT5G61520 AT5G26340 AT5G45380 AT2G17500 AT5G47560 AT1G76520 AT5G13740 AT3G47420 AT4G36670
GO:0015298	F	solute:cation antiporter activity	5	1564	67	37767	0.14	1	AT3G51860 AT4G23700 AT1G64170 AT5G17860 AT3G13320
GO:0005198	F	structural molecule activity	9	1564	659	37767	1	1	AT1G61580 AT3G07390 AT1G26250 AT1G26240 AT2G28830 AT5G52810 AT1G21310 AT1G76930 AT5G54270
GO:0046914	F	transition metal ion binding	76	1564	1618	37767	0.15	1	AT5G05340 AT4G14365 AT2G44790 AT3G46620 AT1G77250 AT5G19890 AT3G44750 AT1G49570 AT5G44070 AT1G79380 AT5G67450 AT5G10380 AT4G11360 AT5G24760 AT2G42360 AT3G52800 AT1G11100 AT2G37430 AT1G72520 AT5G63970 AT2G27660 AT5G59550 AT1G53030 AT1G67800 AT5G14740 AT5G66730 AT3G19010 AT1G61140 AT5G59820 AT4G15975 AT1G20823 AT2G46650 AT4G01350 AT1G64710 AT5G53870 AT3G28480 AT5G05600 AT1G03370 AT4G39830 AT5G39580…
GO:0016020	C	membrane	323	1564	4068	37767	1.6e-24	6.4e-22	AT5G46050 AT1G05570 AT4G26090 AT3G04210 AT5G45380 AT5G44870 AT5G61560 AT5G24430 AT5G58120 AT2G33380 AT4G21120 AT3G09830 AT3G08610 AT4G30190 AT4G17500 AT3G44400 AT4G28390 AT3G59350 AT2G38290 AT4G21680 AT5G61900 AT5G01550 AT4G37450 AT2G06530 AT5G61520 AT1G69270 AT4G30420 AT5G57500 AT5G06320 AT5G01560 AT4G37640 AT4G20110 AT4G05020 AT1G72920 AT1G64610 AT1G76390 AT3G15020 AT5G65280 AT3G03100 AT3G53960…
GO:0005886	C	plasma membrane	151	1564	1456	37767	5.8e-23	1.2e-20	AT4G26090 AT5G45380 AT5G61560 AT5G24430 AT3G09830 AT4G30190 AT3G59350 AT2G38290 AT4G21680 AT5G61900 AT5G01550 AT1G69270 AT2G27500 AT1G76390 AT1G30900 AT2G39350 AT1G70530 AT5G47070 AT4G39955 AT3G54200 AT3G55450 AT4G20110 AT4G19030 AT1G11330 AT1G52200 AT5G01540 AT3G07390 AT3G25070 AT3G52400 AT2G05710 AT5G10380 AT1G64060 AT5G53870 AT4G12070 AT1G66880 AT2G36380 AT5G60300 AT5G25930 AT1G70690 AT1G05570…
GO:0030312	C	external encapsulating structure	57	1564	407	37767	2.9e-15	4e-13	AT5G05340 AT1G31580 AT3G49120 AT5G06870 AT5G44380 AT2G34930 AT5G64120 AT5G20950 AT4G25900 AT2G26020 AT4G24350 AT1G29670 AT5G02490 AT3G43270 AT5G06860 AT1G79670 AT1G04980 AT5G08300 AT1G03220 AT5G44430 AT2G30490 AT3G14060 AT2G06850 AT5G03350 AT1G33600 AT4G19810 AT3G23730 AT1G74010 AT1G33590 AT4G01700 AT5G18470 AT2G38540 AT3G02880 AT4G20830 AT3G55430 AT1G11545 AT1G53240 AT3G16530 AT5G64100 AT2G02850…
GO:0005618	C	cell wall	56	1564	403	37767	7e-15	7.2e-13	AT5G05340 AT1G31580 AT3G49120 AT5G06870 AT5G44380 AT2G34930 AT5G64120 AT5G20950 AT4G25900 AT2G26020 AT4G24350 AT1G29670 AT5G02490 AT3G43270 AT5G06860 AT1G79670 AT1G04980 AT5G08300 AT1G03220 AT5G44430 AT2G30490 AT3G14060 AT2G06850 AT5G03350 AT1G33600 AT4G19810 AT3G23730 AT1G74010 AT1G33590 AT4G01700 AT5G18470 AT2G38540 AT3G02880 AT4G20830 AT3G55430 AT1G11545 AT1G53240 AT3G16530 AT5G64100 AT1G75830…
GO:0044425	C	membrane part	120	1564	1360	37767	9e-14	7.4e-12	AT3G04210 AT4G05020 AT5G44870 AT1G17600 AT3G08610 AT3G44400 AT5G62600 AT4G37640 AT4G20110 AT1G72920 AT1G64610 AT5G65280 AT3G03100 AT4G11150 AT4G36670 AT5G11250 AT5G61310 AT1G66970 AT5G36930 AT2G18450 AT3G54200 AT1G29330 AT5G42800 AT5G41550 AT2G02810 AT3G07390 AT5G65290 AT5G08680 AT1G57630 AT2G17120 AT4G02580 AT1G64060 AT5G53870 AT4G16920 AT2G26600 AT1G69550 AT5G44910 AT2G44790 AT4G09030 AT1G70690…
GO:0070469	C	respiratory chain	25	1564	115	37767	1e-11	7e-10	AT5G40650 AT3G52730 AT2G18450 AT5G05370 AT3G08610 AT4G32470 AT5G08530 AT5G52840 AT5G67590 AT2G40765 AT3G03100 AT3G12260 AT2G02050 AT5G61310 AT3G10860 AT2G42210 AT2G20360 AT2G27730 AT3G18410 AT4G02580 AT5G66760 AT5G47890 AT3G27380 AT1G49140 AT3G27240
GO:0044464	C	cell part	816	1564	15217	37767	8.7e-10	4.5e-08	AT1G61580 AT5G46050 AT5G06870 AT5G03630 AT1G51660 AT3G47480 AT5G44870 AT5G61560 AT5G47420 AT3G47520 AT3G45620 AT5G64100 AT3G59350 AT4G21680 AT3G51430 AT2G02800 AT1G22810 AT2G47800 AT1G72920 AT5G48380 AT3G15020 AT3G50770 AT1G19180 AT5G15730 AT4G04500 AT5G61310 AT2G19130 AT5G19110 AT3G13650 AT1G26390 AT4G24970 AT5G27420 AT1G74360 AT1G79450 AT5G65290 AT3G52400 AT2G21640 AT5G10380 AT2G45220 AT1G23730…
GO:0005623	C	cell	816	1564	15217	37767	8.7e-10	4.5e-08	AT1G61580 AT5G46050 AT5G06870 AT5G03630 AT1G51660 AT3G47480 AT5G44870 AT5G61560 AT5G47420 AT3G47520 AT3G45620 AT5G64100 AT3G59350 AT4G21680 AT3G51430 AT2G02800 AT1G22810 AT2G47800 AT1G72920 AT5G48380 AT3G15020 AT3G50770 AT1G19180 AT5G15730 AT4G04500 AT5G61310 AT2G19130 AT5G19110 AT3G13650 AT1G26390 AT4G24970 AT5G27420 AT1G74360 AT1G79450 AT5G65290 AT3G52400 AT2G21640 AT5G10380 AT2G45220 AT1G23730…
GO:0031224	C	intrinsic to membrane	73	1564	806	37767	1.3e-09	5.8e-08	AT3G04640 AT4G37450 AT4G28085 AT1G57630 AT4G17500 AT5G62600 AT3G04210 AT5G44870 AT4G09030 AT3G02880 AT4G19510 AT4G36010 AT3G44630 AT5G17020 AT5G45000 AT3G44400 AT1G30900 AT1G17600 AT2G32140 AT1G72940 AT5G44910 AT1G72900 AT2G44790 AT5G41740 AT3G51330 AT4G20110 AT1G76520 AT2G17500 AT1G56540 AT1G03870 AT5G40910 AT1G69550 AT5G53870 AT1G07135 AT1G17610 AT3G04220 AT5G20230 AT5G11250 AT3G22600 AT1G14040…
GO:0005739	C	mitochondrion	97	1564	1276	37767	2.9e-08	1.2e-06	AT4G31500 AT2G47510 AT4G05020 AT3G47520 AT3G08610 AT4G28390 AT4G35260 AT3G15020 AT3G03100 AT4G11150 AT2G20420 AT5G61310 AT5G50850 AT4G26910 AT2G05710 AT1G24180 AT4G34200 AT5G08680 AT2G21640 AT4G02580 AT4G33920 AT5G26030 AT2G21870 AT5G07440 AT5G58330 AT2G20800 AT3G52300 AT4G23885 AT5G08530 AT1G53030 AT2G41380 AT3G01290 AT4G11170 AT3G15640 AT4G39030 AT5G65750 AT5G27520 AT4G20830 AT3G22370 AT2G42210…
GO:0005576	C	extracellular region	34	1564	285	37767	5.1e-08	1.9e-06	AT5G05340 AT5G20630 AT5G03350 AT5G58330 AT1G29670 AT1G47710 AT3G23730 AT5G40990 AT2G14610 AT2G14580 AT2G43620 AT5G65870 AT2G06850 AT5G10760 AT3G15020 AT5G64120 AT2G22860 AT4G39830 AT3G49780 AT4G39640 AT1G32940 AT4G20830 AT1G11545 AT3G07390 AT1G78820 AT3G16530 AT4G25000 AT2G02850 AT4G14630 AT4G33720 AT2G18660 AT2G43530 AT2G43570 AT1G17860
GO:0005740	C	mitochondrial envelope	29	1564	223	37767	7.3e-08	2.5e-06	AT5G08670 AT4G05020 AT2G18450 AT5G13490 AT5G05370 AT2G20800 AT3G52730 AT4G28390 AT4G32470 AT1G53030 AT5G52840 AT3G15640 AT2G40765 AT4G11150 AT2G02050 AT5G27520 AT5G61310 AT5G47030 AT3G10860 AT4G24570 AT2G42210 AT5G01500 AT2G29990 AT5G08680 AT3G18410 AT5G66760 AT2G27730 AT1G49140 AT3G27240
GO:0031966	C	mitochondrial membrane	27	1564	210	37767	2.5e-07	7.9e-06	AT5G08670 AT4G05020 AT2G18450 AT5G13490 AT5G05370 AT2G20800 AT3G52730 AT4G28390 AT4G32470 AT5G52840 AT2G40765 AT4G11150 AT2G02050 AT5G27520 AT5G61310 AT5G47030 AT3G10860 AT4G24570 AT2G42210 AT5G01500 AT2G29990 AT5G08680 AT3G18410 AT5G66760 AT2G27730 AT1G49140 AT3G27240
GO:0044455	C	mitochondrial membrane part	17	1564	94	37767	3.3e-07	9.6e-06	AT5G08670 AT4G05020 AT2G29990 AT5G61310 AT5G08680 AT3G52730 AT5G47030 AT2G18450 AT4G11150 AT5G66760 AT5G05370 AT2G20800 AT2G40765 AT2G42210 AT3G10860 AT4G32470 AT3G27240
GO:0045271	C	respiratory chain complex I	14	1564	72	37767	1.4e-06	3.6e-05	AT2G20360 AT5G08530 AT2G02050 AT3G12260 AT2G27730 AT3G18410 AT4G02580 AT5G52840 AT5G67590 AT5G47890 AT3G08610 AT2G42210 AT3G03100 AT1G49140
GO:0030964	C	NADH dehydrogenase complex	14	1564	72	37767	1.4e-06	3.6e-05	AT2G20360 AT5G08530 AT2G02050 AT3G12260 AT2G27730 AT3G18410 AT4G02580 AT5G52840 AT5G67590 AT5G47890 AT3G08610 AT2G42210 AT3G03100 AT1G49140
GO:0044429	C	mitochondrial part	30	1564	274	37767	1.8e-06	4.3e-05	AT5G08670 AT4G05020 AT2G18450 AT5G13490 AT5G05370 AT2G20800 AT3G52730 AT4G28390 AT4G32470 AT1G53030 AT5G52840 AT3G15640 AT2G40765 AT4G11150 AT2G02050 AT5G27520 AT5G61310 AT5G47030 AT3G10860 AT4G24570 AT2G42210 AT5G01500 AT2G29990 AT5G08680 AT3G18410 AT5G66760 AT1G49140 AT1G48030 AT2G27730 AT3G27240
GO:0005743	C	mitochondrial inner membrane	22	1564	172	37767	3.3e-06	7.5e-05	AT5G08670 AT4G05020 AT2G18450 AT5G13490 AT5G05370 AT2G20800 AT3G52730 AT4G28390 AT4G32470 AT2G40765 AT4G11150 AT5G27520 AT5G61310 AT5G47030 AT3G10860 AT4G24570 AT2G42210 AT5G01500 AT2G29990 AT5G08680 AT5G66760 AT3G27240
GO:0009505	C	plant-type cell wall	27	1564	254	37767	9.8e-06	0.00021	AT1G44130 AT3G49120 AT5G06870 AT5G20950 AT4G24350 AT3G43270 AT5G06860 AT1G04980 AT1G03220 AT2G30490 AT2G06850 AT1G33600 AT1G74010 AT5G18470 AT2G38540 AT3G02880 AT4G20830 AT3G16530 AT1G33590 AT2G26440 AT1G21250 AT4G25900 AT2G45220 AT4G30270 AT2G43570 AT2G47550 AT1G16150
GO:0005746	C	mitochondrial respiratory chain	9	1564	39	37767	2.5e-05	0.00051	AT5G61310 AT2G40765 AT2G18450 AT5G66760 AT5G05370 AT3G10860 AT3G52730 AT4G32470 AT3G27240
GO:0005773	C	vacuole	34	1564	383	37767	3.7e-05	0.00071	AT1G55265 AT4G01610 AT4G20830 AT3G51860 AT1G69840 AT2G23150 AT3G55120 AT5G67330 AT4G23200 AT3G13320 AT5G61820 AT5G13930 AT1G78900 AT5G13740 AT4G11150 AT5G49760 AT4G29210 AT4G08780 AT4G29700 AT5G47560 AT4G08770 AT1G31550 AT3G14990 AT4G14630 AT1G62660 AT5G57190 AT5G64870 AT1G27100 AT3G01290 AT1G54020 AT3G22060 AT2G47800 AT2G27730 AT3G27240
GO:0019866	C	organelle inner membrane	24	1564	230	37767	3.9e-05	0.00073	AT5G08670 AT4G05020 AT2G18450 AT5G13490 AT5G05370 AT2G20800 AT3G52730 AT4G28390 AT4G32470 AT1G78620 AT1G27770 AT2G40765 AT4G11150 AT5G27520 AT5G61310 AT5G47030 AT3G10860 AT4G24570 AT2G42210 AT5G01500 AT2G29990 AT5G08680 AT5G66760 AT3G27240
GO:0005783	C	endoplasmic reticulum	38	1564	466	37767	8.3e-05	0.0014	AT4G31500 AT3G51430 AT5G47420 AT5G02100 AT3G55120 AT1G77510 AT4G36220 AT1G27770 AT4G37640 AT2G28630 AT2G30490 AT1G11890 AT3G51440 AT3G28580 AT2G47770 AT4G37370 AT1G55850 AT4G30600 AT3G02875 AT5G03730 AT5G24810 AT3G19260 AT1G29330 AT3G15710 AT5G42800 AT3G26830 AT1G42990 AT2G02810 AT4G30210 AT3G62600 AT4G32650 AT5G13930 AT4G37430 AT2G24180 AT1G72280 AT1G21520 AT4G29520 AT1G09080
GO:0031225	C	anchored to membrane	26	1564	272	37767	8.5e-05	0.0014	AT3G04640 AT4G28085 AT4G09030 AT2G44790 AT3G02880 AT4G36010 AT2G19440 AT3G51330 AT1G07135 AT5G20230 AT3G22600 AT1G66970 AT1G23040 AT3G54200 AT2G27500 AT2G26600 AT3G07390 AT4G37450 AT1G24140 AT2G17120 AT5G49280 AT5G64080 AT1G03870 AT5G53870 AT5G64310 AT3G16860
GO:0005737	C	cytoplasm	353	1564	6822	37767	8.7e-05	0.0014	AT1G61580 AT1G51660 AT3G50770 AT5G61560 AT3G47520 AT2G02390 AT2G02800 AT3G27380 AT1G30620 AT3G15020 AT5G61310 AT1G10070 AT1G79450 AT2G21640 AT1G23730 AT1G72280 AT4G37710 AT3G14090 AT3G56710 AT5G26030 AT1G07000 AT3G13320 AT5G07440 AT5G45510 AT1G53030 AT3G55120 AT1G67980 AT4G38550 AT4G37370 AT1G76790 AT4G08780 AT1G17190 AT5G10520 AT3G26830 AT2G20360 AT3G28450 AT2G39725 AT4G30270 AT5G17220 AT2G47380…
GO:0048046	C	apoplast	19	1564	182	37767	0.00023	0.0037	AT5G05340 AT3G15020 AT4G39640 AT1G32940 AT5G03350 AT4G20830 AT2G43620 AT3G16530 AT5G58330 AT2G43570 AT5G10760 AT1G11545 AT1G29670 AT5G64120 AT1G78820 AT1G17860 AT4G25000 AT1G47710 AT3G23730
GO:0005750	C	mitochondrial respiratory chain complex III	6	1564	23	37767	0.00028	0.0041	AT5G05370 AT2G40765 AT3G10860 AT3G52730 AT4G32470 AT3G27240
GO:0045275	C	respiratory chain complex III	6	1564	23	37767	0.00028	0.0041	AT5G05370 AT2G40765 AT3G10860 AT3G52730 AT4G32470 AT3G27240
GO:0044421	C	extracellular region part	6	1564	25	37767	0.00046	0.0064	AT5G20630 AT5G40990 AT3G49780 AT5G65870 AT2G22860 AT2G02850
GO:0031012	C	extracellular matrix	5	1564	17	37767	0.0005	0.0068	AT5G65870 AT5G20630 AT2G02850 AT3G49780 AT2G22860
GO:0044444	C	cytoplasmic part	316	1564	6289	37767	0.00092	0.012	AT4G31500 AT1G61580 AT1G05570 AT5G03630 AT5G05730 AT4G05020 AT3G50770 AT5G61560 AT3G44720 AT3G47520 AT4G25210 AT2G33380 AT5G02100 AT3G08610 AT3G51430 AT4G28390 AT5G40650 AT1G76790 AT1G76970 AT2G17220 AT5G17990 AT3G28450 AT1G55265 AT4G37640 AT2G28630 AT1G69370 AT4G35260 AT1G21120 AT4G11170 AT2G21640 AT3G15020 AT5G67330 AT5G13930 AT3G03100 AT2G27660 AT5G40760 AT2G20420 AT4G30600 AT1G42990 AT4G26270…
GO:0031975	C	envelope	41	1564	595	37767	0.0014	0.017	AT5G08670 AT4G17500 AT5G62600 AT4G05020 AT3G47520 AT2G18450 AT2G33380 AT5G13490 AT5G05370 AT5G02940 AT2G20800 AT3G52730 AT5G17020 AT4G28390 AT4G32470 AT1G53030 AT3G13930 AT1G78620 AT1G27770 AT5G52840 AT5G52540 AT3G15640 AT2G40765 AT4G11150 AT3G08640 AT2G02050 AT5G27520 AT5G61310 AT5G47030 AT3G10860 AT4G24570 AT2G42210 AT5G58330 AT5G01500 AT2G29990 AT5G08680 AT3G18410 AT5G66760 AT2G27730 AT1G49140…
GO:0031967	C	organelle envelope	41	1564	595	37767	0.0014	0.017	AT5G08670 AT4G17500 AT5G62600 AT4G05020 AT3G47520 AT2G18450 AT2G33380 AT5G13490 AT5G05370 AT5G02940 AT2G20800 AT3G52730 AT5G17020 AT4G28390 AT4G32470 AT1G53030 AT3G13930 AT1G78620 AT1G27770 AT5G52840 AT5G52540 AT3G15640 AT2G40765 AT4G11150 AT3G08640 AT2G02050 AT5G27520 AT5G61310 AT5G47030 AT3G10860 AT4G24570 AT2G42210 AT5G58330 AT5G01500 AT2G29990 AT5G08680 AT3G18410 AT5G66760 AT2G27730 AT1G49140…
GO:0000145	C	exocyst	6	1564	34	37767	0.0025	0.03	AT5G61010 AT1G07000 AT3G55150 AT3G29400 AT2G39380 AT3G14090
GO:0005774	C	vacuolar membrane	11	1564	100	37767	0.003	0.035	AT5G57190 AT3G13320 AT2G47800 AT3G55120 AT5G67330 AT3G51860 AT5G13930 AT1G78900 AT5G13740 AT2G23150 AT4G11150
GO:0044437	C	vacuolar part	11	1564	104	37767	0.004	0.046	AT5G57190 AT3G13320 AT2G47800 AT3G55120 AT5G67330 AT3G51860 AT5G13930 AT1G78900 AT5G13740 AT2G23150 AT4G11150
GO:0012505	C	endomembrane system	175	1564	3416	37767	0.0043	0.048	AT3G48640 AT1G76960 AT5G46080 AT4G11470 AT3G04210 AT5G65600 AT1G61610 AT4G00955 AT1G50740 AT5G62150 AT3G44400 AT3G55120 AT1G78460 AT1G13750 AT3G04480 AT5G57500 AT3G47480 AT4G37640 AT4G23260 AT1G26380 AT2G17500 AT2G05540 AT5G44390 AT1G65500 AT5G15730 AT5G12940 AT1G22890 AT5G58540 AT5G48540 AT4G04500 AT1G03820 AT5G61310 AT1G65510 AT2G19130 AT1G26250 AT4G21400 AT5G42800 AT3G13650 AT3G11340 AT1G26390…
GO:0009705	C	plant-type vacuole membrane	7	1564	51	37767	0.0049	0.053	AT5G57190 AT3G13320 AT3G55120 AT3G51860 AT5G13930 AT5G13740 AT4G11150
GO:0000325	C	plant-type vacuole	8	1564	73	37767	0.011	0.11	AT4G14630 AT5G57190 AT3G13320 AT3G55120 AT3G51860 AT5G13930 AT5G13740 AT4G11150
GO:0044432	C	endoplasmic reticulum part	8	1564	75	37767	0.013	0.13	AT1G42990 AT2G02810 AT5G03730 AT3G62600 AT4G37640 AT3G55120 AT5G42800 AT1G09080
GO:0031090	C	organelle membrane	48	1564	842	37767	0.019	0.19	AT5G08670 AT3G13320 AT4G05020 AT2G18450 AT2G33380 AT5G13490 AT3G51860 AT2G20800 AT3G52730 AT2G23150 AT4G28390 AT4G32470 AT1G78620 AT1G27770 AT4G37640 AT3G55120 AT5G52840 AT5G13930 AT1G78900 AT2G40765 AT4G11150 AT3G15640 AT2G02050 AT5G03730 AT5G27520 AT5G61310 AT5G13740 AT5G47030 AT3G14440 AT3G10860 AT4G24570 AT2G42210 AT5G42800 AT5G01500 AT1G42990 AT2G06530 AT2G02810 AT5G57190 AT2G29990 AT5G08680…
GO:0044448	C	cell cortex part	6	1564	52	37767	0.02	0.2	AT5G61010 AT1G07000 AT3G55150 AT3G29400 AT2G39380 AT3G14090
GO:0005938	C	cell cortex	6	1564	54	37767	0.024	0.23	AT5G61010 AT1G07000 AT3G55150 AT3G29400 AT2G39380 AT3G14090
GO:0031226	C	intrinsic to plasma membrane	7	1564	74	37767	0.034	0.31	AT3G02880 AT5G64080 AT4G20110 AT1G64060 AT3G54200 AT1G30900 AT2G27500
GO:0005789	C	endoplasmic reticulum membrane	6	1564	64	37767	0.049	0.45	AT1G42990 AT2G02810 AT5G03730 AT4G37640 AT3G55120 AT5G42800
GO:0043231	C	intracellular membrane-bounded organelle	347	1564	7615	37767	0.054	0.48	AT1G51660 AT3G50770 AT5G61560 AT5G47420 AT3G47520 AT3G51430 AT2G02800 AT1G22810 AT3G27380 AT1G30620 AT3G15020 AT1G19180 AT5G61310 AT1G79450 AT2G21640 AT1G72280 AT4G37710 AT3G56710 AT5G26030 AT3G13320 AT5G07440 AT2G20800 AT1G52400 AT2G33710 AT1G53030 AT3G55120 AT4G38550 AT4G37370 AT4G08780 AT3G26830 AT2G20360 AT3G28450 AT2G39725 AT2G47380 AT4G01610 AT1G49000 AT3G44750 AT2G44840 AT1G10070 AT4G32470…
GO:0043227	C	membrane-bounded organelle	347	1564	7622	37767	0.056	0.49	AT1G51660 AT3G50770 AT5G61560 AT5G47420 AT3G47520 AT3G51430 AT2G02800 AT1G22810 AT3G27380 AT1G30620 AT3G15020 AT1G19180 AT5G61310 AT1G79450 AT2G21640 AT1G72280 AT4G37710 AT3G56710 AT5G26030 AT3G13320 AT5G07440 AT2G20800 AT1G52400 AT2G33710 AT1G53030 AT3G55120 AT4G38550 AT4G37370 AT4G08780 AT3G26830 AT2G20360 AT3G28450 AT2G39725 AT2G47380 AT4G01610 AT1G49000 AT3G44750 AT2G44840 AT1G10070 AT4G32470…
GO:0042175	C	nuclear envelope-endoplasmic reticulum network	6	1564	67	37767	0.059	0.5	AT1G42990 AT2G02810 AT5G03730 AT4G37640 AT3G55120 AT5G42800
GO:0044424	C	intracellular part	419	1564	9302	37767	0.063	0.53	AT1G61580 AT1G51660 AT3G50770 AT5G61560 AT5G47420 AT3G47520 AT3G45620 AT2G02390 AT3G51430 AT2G02800 AT1G22810 AT2G47800 AT4G11170 AT3G15020 AT1G19180 AT5G61310 AT1G79450 AT2G21640 AT1G23730 AT1G72280 AT4G37710 AT3G14090 AT3G56710 AT5G26030 AT1G07000 AT3G13320 AT5G07440 AT5G45510 AT1G52400 AT2G33710 AT1G53030 AT3G55120 AT1G67980 AT4G38550 AT4G37370 AT1G76790 AT4G08780 AT1G17190 AT5G10520 AT3G26830…
GO:0044428	C	nuclear part	15	1564	543	37767	0.96	1	AT2G33710 AT4G25340 AT4G17500 AT5G62600 AT2G21870 AT5G22650 AT2G27730 AT4G25210 AT3G44750 AT3G53230 AT3G15210 AT2G39660 AT2G38250 AT5G17020 AT2G46400
GO:0044422	C	organelle part	86	1564	2562	37767	0.98	1	AT1G61580 AT4G05020 AT3G47520 AT4G25210 AT2G33380 AT4G28390 AT4G37640 AT1G30900 AT5G22650 AT5G61310 AT1G29330 AT5G42800 AT4G20110 AT2G02810 AT5G57190 AT1G79450 AT5G08680 AT5G67330 AT3G13320 AT5G58330 AT5G02940 AT2G20800 AT5G17020 AT2G33710 AT1G53030 AT1G27770 AT3G55120 AT3G15640 AT5G13740 AT5G27520 AT3G09020 AT3G62600 AT3G14440 AT2G42210 AT2G29990 AT3G09490 AT5G42650 AT3G27240 AT4G17500 AT5G62600…
GO:0009941	C	chloroplast envelope	9	1564	265	37767	0.77	1	AT3G08640 AT3G13930 AT1G78620 AT1G27770 AT2G33380 AT5G58330 AT5G02940 AT5G52540 AT5G01500
GO:0005777	C	peroxisome	8	1564	163	37767	0.36	1	AT1G26930 AT5G27520 AT5G27600 AT5G04870 AT2G44490 AT1G20630 AT4G16760 AT3G51660
GO:0009526	C	plastid envelope	11	1564	331	37767	0.81	1	AT3G08640 AT3G13930 AT1G78620 AT1G27770 AT3G47520 AT2G33380 AT5G58330 AT5G02940 AT5G52540 AT2G42210 AT5G01500
GO:0005622	C	intracellular	426	1564	9671	37767	0.13	1	AT1G61580 AT1G51660 AT3G50770 AT5G61560 AT5G47420 AT3G47520 AT3G45620 AT2G02390 AT3G51430 AT2G02800 AT1G22810 AT2G47800 AT4G11170 AT3G15020 AT1G19180 AT5G61310 AT1G79450 AT2G21640 AT1G23730 AT1G72280 AT4G37710 AT3G14090 AT3G56710 AT5G26030 AT1G07000 AT3G13320 AT5G07440 AT5G45510 AT1G52400 AT2G33710 AT1G53030 AT3G55120 AT1G67980 AT4G38550 AT4G37370 AT1G76790 AT4G08780 AT1G17190 AT5G10520 AT3G26830…
GO:0000151	C	ubiquitin ligase complex	9	1564	259	37767	0.75	1	AT5G52250 AT5G67340 AT1G21410 AT3G45620 AT5G37490 AT4G36550 AT5G09800 AT2G28830 AT5G01830
GO:0016021	C	integral to membrane	17	1564	395	37767	0.47	1	AT4G17500 AT5G62600 AT5G61520 AT1G69730 AT5G65290 AT1G14040 AT1G16260 AT2G17500 AT1G79680 AT4G20110 AT1G76520 AT1G64060 AT1G29330 AT1G35350 AT5G17020 AT1G30900 AT4G36670
GO:0042579	C	microbody	8	1564	163	37767	0.36	1	AT1G26930 AT5G27520 AT5G27600 AT5G04870 AT2G44490 AT1G20630 AT4G16760 AT3G51660
GO:0043234	C	protein complex	60	1564	1443	37767	0.51	1	AT5G05730 AT5G61010 AT5G08670 AT4G17500 AT1G07000 AT5G62600 AT3G12260 AT5G06750 AT3G08610 AT3G45620 AT1G05570 AT4G33430 AT3G52730 AT5G17020 AT2G18450 AT4G32470 AT5G08530 AT5G52250 AT5G67340 AT3G29400 AT4G33920 AT3G11820 AT4G20110 AT5G52840 AT5G67590 AT1G21410 AT2G40765 AT3G03100 AT4G11150 AT4G39400 AT5G54270 AT4G26270 AT2G02050 AT5G05370 AT5G47030 AT5G66760 AT3G10860 AT5G01830 AT2G42210 AT1G30900…
GO:0043232	C	intracellular non-membrane-bounded organelle	14	1564	1040	37767	1	1	AT1G61580 AT2G33710 AT4G25340 AT2G21870 AT5G22650 AT2G27730 AT5G55070 AT4G25210 AT3G44750 AT3G53230 AT2G28830 AT2G39660 AT2G38250 AT2G46400
GO:0005829	C	cytosol	39	1564	912	37767	0.44	1	AT1G61580 AT2G17290 AT4G12720 AT1G30270 AT5G45510 AT5G02490 AT1G17745 AT1G76790 AT1G33030 AT5G36880 AT3G52450 AT1G21130 AT1G21100 AT1G21120 AT5G14740 AT1G67980 AT4G35310 AT5G40760 AT5G49480 AT4G26270 AT2G02010 AT5G02500 AT3G53230 AT4G21850 AT5G03630 AT4G15530 AT3G09940 AT5G10520 AT5G16970 AT4G21830 AT3G12580 AT1G45145 AT2G35930 AT5G22650 AT1G23730 AT5G52640 AT1G24180 AT5G16570 AT1G55920
GO:0009579	C	thylakoid	6	1564	376	37767	1	1	AT1G79450 AT3G09490 AT5G58330 AT3G14440 AT3G15640 AT5G01500
GO:0044431	C	Golgi apparatus part	7	1564	118	37767	0.22	1	AT1G76970 AT1G21380 AT3G09020 AT1G29330 AT2G47770 AT1G30900 AT4G20110
GO:0044436	C	thylakoid part	5	1564	307	37767	1	1	AT3G09490 AT3G14440 AT5G01500 AT3G15640 AT1G79450
GO:0044435	C	plastid part	19	1564	867	37767	1	1	AT2G45290 AT3G08640 AT3G13930 AT1G78620 AT5G52540 AT1G27770 AT3G09490 AT1G79450 AT3G47520 AT2G33380 AT5G58330 AT5G42650 AT5G51070 AT5G02940 AT3G14440 AT3G15640 AT2G42210 AT1G54570 AT5G01500
GO:0044434	C	chloroplast part	17	1564	746	37767	1	1	AT2G45290 AT3G08640 AT3G13930 AT1G78620 AT1G27770 AT3G09490 AT1G79450 AT3G14440 AT2G33380 AT5G58330 AT5G42650 AT5G51070 AT5G02940 AT5G52540 AT3G15640 AT1G54570 AT5G01500
GO:0009507	C	chloroplast	107	1564	2740	37767	0.74	1	AT3G50770 AT5G61560 AT3G44720 AT3G47520 AT4G25210 AT2G33380 AT2G17220 AT4G14680 AT5G11250 AT3G47640 AT1G13990 AT4G39950 AT3G09600 AT4G30210 AT1G79450 AT2G05710 AT4G37710 AT3G56710 AT1G72520 AT5G26030 AT2G21870 AT4G39940 AT5G58330 AT5G02940 AT1G55920 AT1G17745 AT2G27660 AT1G80450 AT1G27770 AT3G15640 AT4G38550 AT5G09570 AT3G14440 AT4G15530 AT3G17810 AT2G13560 AT4G04610 AT3G28450 AT4G26970 AT3G09490…
GO:0019898	C	extrinsic to membrane	7	1564	104	37767	0.14	1	AT5G52250 AT4G05020 AT3G55120 AT1G64610 AT2G20800 AT5G65280 AT5G42800
GO:0070013	C	intracellular organelle lumen	17	1564	539	37767	0.9	1	AT2G33710 AT4G25340 AT1G79450 AT5G22650 AT2G27730 AT2G21870 AT3G62600 AT4G25210 AT3G44750 AT3G53230 AT3G09490 AT3G15210 AT2G39660 AT2G38250 AT2G46400 AT1G48030 AT1G09080
GO:0031974	C	membrane-enclosed lumen	18	1564	546	37767	0.86	1	AT2G33710 AT4G25340 AT1G53030 AT1G79450 AT5G22650 AT2G27730 AT2G21870 AT3G62600 AT4G25210 AT3G44750 AT3G53230 AT3G09490 AT3G15210 AT2G39660 AT2G38250 AT2G46400 AT1G48030 AT1G09080
GO:0043229	C	intracellular organelle	349	1564	8149	37767	0.29	1	AT1G61580 AT1G51660 AT3G50770 AT5G61560 AT5G47420 AT3G47520 AT3G51430 AT2G02800 AT1G22810 AT3G27380 AT1G30620 AT3G15020 AT1G19180 AT5G61310 AT1G79450 AT2G21640 AT1G72280 AT4G37710 AT3G56710 AT5G26030 AT3G13320 AT5G07440 AT2G20800 AT1G52400 AT2G33710 AT1G53030 AT3G55120 AT4G38550 AT4G37370 AT4G08780 AT3G26830 AT2G20360 AT3G28450 AT2G39725 AT2G47380 AT4G01610 AT1G49000 AT3G44750 AT2G44840 AT1G10070…
GO:0043228	C	non-membrane-bounded organelle	14	1564	1040	37767	1	1	AT1G61580 AT2G33710 AT4G25340 AT2G21870 AT5G22650 AT2G27730 AT5G55070 AT4G25210 AT3G44750 AT3G53230 AT2G28830 AT2G39660 AT2G38250 AT2G46400
GO:0043226	C	organelle	349	1564	8155	37767	0.29	1	AT1G61580 AT1G51660 AT3G50770 AT5G61560 AT5G47420 AT3G47520 AT3G51430 AT2G02800 AT1G22810 AT3G27380 AT1G30620 AT3G15020 AT1G19180 AT5G61310 AT1G79450 AT2G21640 AT1G72280 AT4G37710 AT3G56710 AT5G26030 AT3G13320 AT5G07440 AT2G20800 AT1G52400 AT2G33710 AT1G53030 AT3G55120 AT4G38550 AT4G37370 AT4G08780 AT3G26830 AT2G20360 AT3G28450 AT2G39725 AT2G47380 AT4G01610 AT1G49000 AT3G44750 AT2G44840 AT1G10070…
GO:0044446	C	intracellular organelle part	86	1564	2561	37767	0.98	1	AT1G61580 AT4G05020 AT3G47520 AT4G25210 AT2G33380 AT4G28390 AT4G37640 AT1G30900 AT5G22650 AT5G61310 AT1G29330 AT5G42800 AT4G20110 AT2G02810 AT5G57190 AT1G79450 AT5G08680 AT5G67330 AT3G13320 AT5G58330 AT5G02940 AT2G20800 AT5G17020 AT2G33710 AT1G53030 AT1G27770 AT3G55120 AT3G15640 AT5G13740 AT5G27520 AT3G09020 AT3G62600 AT3G14440 AT2G42210 AT2G29990 AT3G09490 AT5G42650 AT3G27240 AT4G17500 AT5G62600…
GO:0005730	C	nucleolus	11	1564	209	37767	0.25	1	AT2G33710 AT4G25340 AT2G21870 AT5G22650 AT2G27730 AT4G25210 AT3G44750 AT3G53230 AT2G39660 AT2G38250 AT2G46400
GO:0005634	C	nucleus	87	1564	2621	37767	0.98	1	AT1G64380 AT1G80840 AT1G51660 AT4G25210 AT4G37790 AT2G02800 AT1G22810 AT2G27500 AT5G39610 AT1G19180 AT5G22650 AT4G23810 AT1G72450 AT2G02010 AT5G25440 AT5G46910 AT1G24180 AT3G48890 AT4G19660 AT4G39780 AT3G50260 AT5G43170 AT2G24570 AT2G25000 AT2G21870 AT5G17020 AT2G33710 AT3G55120 AT4G27410 AT4G34390 AT2G39660 AT4G15530 AT1G10585 AT1G43160 AT5G24590 AT1G76040 AT5G47220 AT4G17500 AT5G58350 AT5G62600…
GO:0009536	C	plastid	121	1564	2965	37767	0.58	1	AT3G50770 AT5G61560 AT3G44720 AT3G47520 AT4G25210 AT2G33380 AT4G28390 AT2G17220 AT1G69370 AT4G14680 AT5G11250 AT3G47640 AT1G13990 AT4G39950 AT3G09600 AT4G30210 AT1G79450 AT2G05710 AT4G37710 AT3G56710 AT1G72520 AT5G26030 AT2G21870 AT4G39940 AT5G58330 AT5G02940 AT2G20800 AT3G52300 AT1G17745 AT2G27660 AT1G80450 AT1G27770 AT3G15640 AT4G38550 AT5G09570 AT4G39030 AT3G22370 AT3G14440 AT4G15530 AT2G42210…
GO:0032991	C	macromolecular complex	63	1564	2180	37767	1	1	AT1G61580 AT5G05730 AT5G61010 AT5G08670 AT4G17500 AT1G07000 AT5G62600 AT3G12260 AT5G06750 AT3G08610 AT3G45620 AT1G05570 AT4G33430 AT3G52730 AT5G17020 AT2G18450 AT4G32470 AT5G08530 AT5G52250 AT5G67340 AT3G29400 AT4G33920 AT3G11820 AT4G20110 AT5G52840 AT5G67590 AT1G21410 AT2G40765 AT3G03100 AT4G11150 AT4G30600 AT4G39400 AT5G54270 AT4G26270 AT2G02050 AT5G55070 AT5G05370 AT5G47030 AT5G66760 AT3G10860…
GO:0005794	C	Golgi apparatus	13	1564	293	37767	0.44	1	AT3G28480 AT1G76970 AT1G21380 AT3G09020 AT5G33290 AT1G30000 AT3G19260 AT1G11890 AT1G30620 AT1G29330 AT2G47770 AT1G30900 AT4G20110
GO:0043233	C	organelle lumen	17	1564	539	37767	0.9	1	AT2G33710 AT4G25340 AT1G79450 AT5G22650 AT2G27730 AT2G21870 AT3G62600 AT4G25210 AT3G44750 AT3G53230 AT3G09490 AT3G15210 AT2G39660 AT2G38250 AT2G46400 AT1G48030 AT1G09080
GO:0044459	C	plasma membrane part	13	1564	222	37767	0.14	1	AT5G52250 AT2G27500 AT1G24150 AT1G70140 AT3G02880 AT1G70690 AT5G64080 AT1G05570 AT1G64610 AT1G64060 AT3G54200 AT1G30900 AT4G20110
GO:0031981	C	nuclear lumen	12	1564	374	37767	0.85	1	AT2G33710 AT4G25340 AT2G21870 AT5G22650 AT2G27730 AT4G25210 AT3G44750 AT3G53230 AT3G15210 AT2G39660 AT2G38250 AT2G46400
